# Supplementary material for: The duplicated cytochrome P450 CYP6P9a/b confers cross-resistance to a mitochondrial complex I inhibitor in the African malaria vector Anopheles funestus
Source: BMC Genomics. 2025 Sep 26;26:837. doi: 10.1186/s12864-025-11984-1 (PMC12465288; doi:10.1186/s12864-025-11984-1)
Supplement: Supplementary file 1 — Supplementary Material 1 [file 12864_2025_11984_MOESM1_ESM.xlsx]

## Sheet: Bioassay_Hybrids_raw
	IVCC CDC Bottle assay with FUMOZ/FANG hybrids (30 minutes exposure)
	Species	Date	Net	Sex	Exposure	1H Knockdown	24H Dead	24H Alive	Total	%Mortality	corrected (Abbott's)	Average
	F7	15.09.21	Negative control	Female	30 minutes	0	0	23	23	0		0
	F7	15.09.21	Negative control	Female		0	0	18	18	0
	F4	7.10.21	Negative control	Female		0	2	22	24	8.33333		8.16667	0
	F4	7.10.21	Negative control	Female		0	2	23	25	8						Alive	Dead	% Knockdown	% Mortality 24 h (30 mins expo.)	Corrected	Error
	F7	15.09.21	Permethrin control	Female		ɏ	19	2	21	90.4762	90.0707	89.006			Negative control	86	4	2	4.08333	0	2.3585
	F7	15.09.21	Permethrin control	Female		ɏ - 1	18	3	21	85.7143	85.1061				Permethrin control	51	146	90.4	73.8305	72.7164	6.21122
	F7	15.09.21	Permethrin control	Female		ɏ - 1	21	4	25	84	83.3189				Sherlock 1xDC	61	132	100	67.9599	66.5959	4.58057
	F7	15.09.21	Permethrin control	Female		ɏ - 2	23	1	24	95.8333	95.656				Sherlock 5xDC	42	175	100	80.2386	79.3974	5.0674
	F4	7.10.21	Permethrin control	Female		ɏ -4	8	12	20	40	37.4457	61.6901	58.2832
	F4	7.10.21	Permethrin control	Female		ɏ -3	15	12	27	55.5556	53.6635
	F4	7.10.21	Permethrin control	Female		ɏ -2	15	5	20	75	73.9357
	F4	7.10.21	Permethrin control	Female		ɏ -3	16	4	20	80	79.1486
	F4	7.10.21	Permethrin control	Female		ɏ -3	11	8	19	57.8947	56.1022
	F7	15.09.21	1x DC Sherlock	Female		ɏ	16	5	21	76.1905	75.1769	82.0445
	F7	15.09.21	1x DC Sherlock	Female		ɏ	22	5	27	81.4815	80.6931
	f7	15.09.21	1x DC Sherlock	Female		ɏ	23	3	26	88.4615	87.9703
	F7	15.09.21	1x DC Sherlock	Female		ɏ	10	12	22	45.4545	43.1325
	F4	7.10.21	1x DC Sherlock	Female		ɏ	12	9	21	57.1429	55.3184	64.0102	64.0102
	F4	7.10.21	1x DC Sherlock	Female		ɏ	14	11	25	56	54.1268
	F4	7.10.21	1x DC Sherlock	Female		ɏ	12	7	19	63.1579	61.5895
	F4	7.10.21	1x DC Sherlock	Female		ɏ	11	5	16	68.75	67.4196
	F4	7.10.21	1x DC Sherlock	Female		ɏ	12	4	16	75	73.9357
	F7	15.09.21	5x DC Sherlock	Female		ɏ	16	4	20	80	79.1486	87.9583
	F7	15.09.21	5x DC Sherlock	Female		ɏ	23	1	24	95.8333	95.656
	F7	15.09.21	5x DC Sherlock	Female		ɏ	24	1	25	96	95.8297
	F7	15.09.21	5x DC Sherlock	Female		ɏ	20	5	25	80	79.1486
	F4	7.10.21	5x DC Sherlock	Female		ɏ	14	9	23	60.8696	59.2037	67.5786	67.5786
	F4	7.10.21	5x DC Sherlock	Female		ɏ	20	6	26	76.9231	75.9407
	F4	7.10.21	5x DC Sherlock	Female		ɏ	13	10	23	56.5217	54.6708
	F4	7.10.21	5x DC Sherlock	Female		ɏ	26	0	26	100	100
	F4	7.10.21	5x DC Sherlock	Female		ɏ	19	6	25	76	74.9783
	IVCC CDC Bottle assay with FUMOZ/FANG hybrids (60 minutes exposure)
	Species	Date	Net	Sex	Expo.	1H Knockdown	24H Dead	24H Alive	Total	%Mortality	corrected (Abbott's)	Average
	F7	11.09.21	Negative control	Female	60 minutes	0	0	23	23	0		0
	F7	11.09.21	Negative control	Female		0	0	18	18	0
	F4	19.09.21	Negative control	Female		0	0	25	25	0		7.89474	0
	F4	19.09.21	Negative control	Female		1	3	16	19	15.7895
	F4	24.09.21	Negative control	Female		1	2	25	27	7.40741		11.436	0
	F4	24.09.21	Negative control	Female		3	2	16	18	11.1111
	F4	24.09.21	Negative control	Female		1	3	16	19	15.7895
	F4	27.09.21	Negative control	Female		0	1	24	25	4		6	0
	F4	27.09.21	Negative control	Female		0	2	23	25	8
	F4	7.10.21	Negative control	Female		0	2	30	32	6.25		6.25	0
	F7	11.09.21	Permethrin control	Female		ɏ	20	0	20	100	100	93.8672
	F7	11.09.21	Permethrin control	Female		ɏ	21	0	21	100	100
	F7	11.09.21	Permethrin control	Female		ɏ	21	0	21	100	100
	F7	11.09.21	Permethrin control	Female		ɏ	21	0	21	100	100
	F7	11.09.21	Permethrin control	Female		ɏ	19	2	21	90.4762	89.7775
	F7	11.09.21	Permethrin control	Female		ɏ -1	16	6	22	72.7273	70.7265
	F4	19.09.21	Permethrin control	Female		ɏ	20	4	24	83.3333	82.1106	94.6819	100
	F4	19.09.21	Permethrin control	Female		ɏ	32	0	32	100	100
	F4	19.09.21	Permethrin control	Female		ɏ -1	23	3	26	88.4615	87.6151
	F4	19.09.21	Permethrin control	Female		ɏ	26	1	27	96.2963	96.0246					Alive	Dead	% Knockdown (1h)	%Mortality 24h (60 mins expo.)	corrected	SD
	F4	19.09.21	Permethrin control	Female		ɏ	23	0	23	100	100				Negative control	216	15	0	6.83475	0	1.91156
	F4	19.09.21	Permethrin control	Female		ɏ	21	0	21	100	100				Permethrin control	49	653	100	92.9231	92.4039	1.21603
	F4	24.09.21	Permethrin control	Female		ɏ	31	1	32	96.875	96.6457	93.1303	93.1303		IVC-5743 1x DC	42	576	100	92.8348	92.3091	1.57679
	F4	24.09.21	Permethrin control	Female		ɏ	28	3	31	90.3226	89.6126				IVC-5743 5x DC	20	646	100	96.9715	96.7493	0.924564
	F4	24.09.21	Permethrin control	Female		ɏ -1	30	2	32	93.75	93.2915
	F4	24.09.21	Permethrin control	Female		ɏ	23	2	25	92	91.4131
	F4	24.09.21	Permethrin control	Female		ɏ	30	2	32	93.75	93.2915
	F4	24.09.21	Permethrin control	Female		ɏ	27	3	30	90	89.2664
	F4	24.09.21	Permethrin control	Female		ɏ	38	1	39	97.4359	97.2478
	F4	24.09.21	Permethrin control	Female		ɏ	30	3	33	90.9091	90.2422
	F4	27.09.21	Permethrin control	Female		ɏ	22	3	25	88	87.1197	91.0557	91.0557
	F4	27.09.21	Permethrin control	Female		ɏ	24	2	26	92.3077	91.7434
	F4	27.09.21	Permethrin control	Female		ɏ	21	2	23	91.3043	90.6664
	F4	27.09.21	Permethrin control	Female		ɏ	22	2	24	91.6667	91.0553
	F4	27.09.21	Permethrin control	Female		ɏ	23	2	25	92	91.4131
	F4	7.10.21	Permethrin control	Female		ɏ -1	24	2	26	92.3077	91.7434	88.6538	88.6538
	F4	7.10.21	Permethrin control	Female		ɏ -1	17	3	20	85	83.8996
	F7	11.09.21	1x DC Sherlock	Female		ɏ	18	3	21	85.7143	84.6663	94.5774
	F7	11.09.21	1x DC Sherlock	Female		ɏ	19	0	19	100	100
	F7	11.09.21	1x DC Sherlock	Female		ɏ	23	0	23	100	100
	F7	11.09.21	1x DC Sherlock	Female		ɏ	20	0	20	100	100
	F7	11.09.21	1x DC Sherlock	Female		ɏ	22	3	25	88	87.1197
	F7	11.09.21	1x DC Sherlock	Female		ɏ	15	1	16	93.75	93.2915
	F4	19.09.21	1x DC Sherlock	Female		ɏ	19	2	21	90.4762	89.7775	93.8942	100
	F4	19.09.21	1x DC Sherlock	Female		ɏ	24	3	27	88.8889	88.0738
	F4	19.09.21	1x DC Sherlock	Female		ɏ	21	4	25	84	82.8262
	F4	19.09.21	1x DC Sherlock	Female		ɏ	20	0	20	100	100
	F4	19.09.21	1x DC Sherlock	Female		ɏ	29	0	29	100	100
	F4	19.09.21	1x DC Sherlock	Female		ɏ	24	0	24	100	100
	F4	24.0.9.21	1x DC Sherlock	Female		ɏ	14	2	16	87.5	86.583	90.6445	90.6445
	F4	24.0.9.21	1x DC Sherlock	Female		ɏ	32	2	34	94.1176	93.6861
	F4	24.0.9.21	1x DC Sherlock	Female		ɏ	13	4	17	76.4706	74.7444
	F4	24.0.9.21		Female		ɏ	27	0	27	100	100
	F4	24.0.9.21	1x DC Sherlock	Female		ɏ	21	2	23	91.3043	90.6664
	F4	24.0.9.21	1x DC Sherlock	Female		ɏ	20	2	22	90.9091	90.2422
	F4	24.0.9.21	1x DC Sherlock	Female		ɏ	30	1	31	96.7742	96.5375
	F4	24.0.9.21	1x DC Sherlock	Female		ɏ	38	1	39	97.4359	97.2478
	F4	27.09.21	1x DC Sherlock	Female		ɏ	21	3	24	87.5	86.583	91.8949	91.8949
	F4	27.09.21	1x DC Sherlock	Female		ɏ	22	2	24	91.6667	91.0553
	F4	27.09.21	1x DC Sherlock	Female		ɏ	22	3	25	88	87.1197
	F4	27.09.21	1x DC Sherlock	Female		ɏ	24	2	26	92.3077	91.7434
	F4	27.09.21	1x DC Sherlock	Female		ɏ	23	0	23	100	100
	F4	7.10.21	1x DC Sherlock	Female		ɏ	16	2	18	88.8889	88.0738	94.4444	94.4444
	F4	7.10.21	1x DC Sherlock	Female		ɏ	26	0	26	100	100
	F7	11.09.21	5x DC Sherlock	Female		ɏ	16	0	16	100	100	98.6111
	F7	11.09.21	5x DC Sherlock	Female		ɏ	22	2	24	91.6667	91.0553
	F7	11.09.21	5x DC Sherlock	Female		ɏ	22	0	22	100	100
	F7	11.09.21	5x DC Sherlock	Female		ɏ	22	0	22	100	100
	F7	11.09.21	5x DC Sherlock	Female		ɏ	21	0	21	100	100
	F7	11.09.21	5x DC Sherlock	Female		ɏ	16	0	16	100	100
	F4	19.09.21	5x DC Sherlock	Female		ɏ	20	4	24	83.3333	82.1106	94.0834	100
	F4	19.09.21	5x DC Sherlock	Female		ɏ	28	1	29	96.5517	96.2988
	F4	19.09.21	5x DC Sherlock	Female		ɏ	22	4	26	84.6154	83.4867
	F4	19.09.21	5x DC Sherlock	Female		ɏ	26	0	26	100	100
	F4	19.09.21	5x DC Sherlock	Female		ɏ	24	0	24	100	100
	F4	19.09.21	5x DC Sherlock	Female		ɏ	21	0	21	100	100
	F4	24.09.21	5x DC Sherlock	Female		ɏ	34	0	34	100	100	98.8802	86.1842
	F4	24.09.21	5x DC Sherlock	Female		ɏ	16	0	16	100	100
	F4	24.09.21	5x DC Sherlock	Female		ɏ	25	0	25	100	100
	F4	24.09.21	5x DC Sherlock	Female		ɏ	19	0	19	100	100
	F4	24.09.21	5x DC Sherlock	Female		ɏ	29	1	30	96.6667	96.4221
	F4	24.09.21	5x DC Sherlock	Female		ɏ	38	0	38	100	100
	F4	24.09.21	5x DC Sherlock	Female		ɏ	39	1	40	97.5	97.3166
	F4	24.09.21	5x DC Sherlock	Female		ɏ	31	1	32	96.875	96.6457
	F4	27.09.21	5x DC Sherlock	Female		ɏ	25	1	26	96.1538	95.8717	95.1567	95.1567
	F4	27.09.21	5x DC Sherlock	Female		ɏ	21	0	21	100	100
	F4	27.09.21	5x DC Sherlock	Female		ɏ	14	2	16	87.5	86.583
	F4	27.09.21	5x DC Sherlock	Female		ɏ	26	1	27	96.2963	96.0246
	F4	27.09.21	5x DC Sherlock	Female		ɏ	23	1	24	95.8333	95.5277
	F4	7.10.21	5x DC Sherlock	Female		ɏ	20	1	21	95.2381	94.8888	97.619	50.8403
	F4	7.10.21	5x DC Sherlock	Female		ɏ	26	0	26	100	100

## Sheet: Bioassay_Hybrids_summary
	IVCC CDC Bottle assay with FUMOZ/FANG hybrids (30 minutes exposure)
	Species	Date of Bioassay	Bioassay #	Insecticide	# of Replicates	Sex	Time expo.	Alive after 24 H	Dead after 24H	Total	%Mortality 24H	Corrected (Abbott's)
	Fz/Fg F7	15.09.21	1	Negative control	2	Female	30 mins	41	0	41	0	0
				Permethrin control	4	Female		10	81	91	89.011	89.011
				Sherlock 1xDC	4	Female		25	71	96	73.9583	73.9583
				Sherlock 5xDC	4	Female		11	83	94	88.2979	88.2979
	Fz/Fg F4	7.10.21	2	Negative control	2	Female		45	4	49	8.16327	0
				Permethrin control	5	Female		41	65	106	61.3208	57.8826
				Sherlock 1xDC	5	Female		36	61	97	62.8866	59.5876
				Sherlock 5xDC	5	Female		31	92	123	74.7967	72.5565
				SUMMARY
				Insecticide	% Mortality	SEM	Alive after 24 H	Dead after 24 H
				Negative control	0	2.3585	86	4
				Permethrin control	73.4468	6.21122	51	146
				Sherlock 1xDC	66.773	4.58057	61	132
				Sherlock 5xDC	80.4272	5.0674	42	175
	IVCC CDC Bottle assay with FUMOZ/FANG hybrids (60 minutes exposure)
	Species	Date of Bioassay	Bioassay #	Insecticide	# of Replicates	Sex	Time expo.	Alive after 24 H	Dead after 24H	Total	%Mortality 24H	Corrected (Abbott's)
	Fz/Fg F7	11.09.21	1	Negative control	2	Female	60 mins	41	0	41	0	0
				Permethrin control	6	Female		8	118	126	93.6508	93.6508
				Sherlock 1xDC	6	Female		7	117	124	94.3548	94.3548
				Sherlock 5xDC	6	Female		2	119	121	98.3471	98.3471
	Fz/Fg F4	19.09.21	2	Negative control	2	Female		41	3	44	6.81818	0
				Permethrin control	6	Female		8	145	153	94.7712	94.3886
				Sherlock 1xDC	6	Female		9	137	146	93.8356	93.3846
				Sherlock 5xDC	6	Female		9	141	150	94	93.561
	Fz/Fg F7	24.09.21	3	Negative control	3	Female		57	7	64	10.9375	0
				Permethrin control	8	Female		17	237	254	93.3071	92.4851
				Sherlock 1xDC	7	Female		14	168	182	92.3077	91.363
				Sherlock 5xDC	8	Female		3	231	234	98.7179	98.5605
	Fz/Fg F4	27.09.21	4	Negative control	2	Female		47	3	50	6	0
				Permethrin control	5	Female		11	112	123	91.0569	90.4861
				Sherlock 1xDC	5	Female		10	112	122	91.8033	91.2801
				Sherlock 5xDC	5	Female		5	109	114	95.614	95.3341
	Fz/Fg F4	7.10.21	5	Negative control	1	Female		30	2	32	6.25	0
				Permethrin control	2	Female		5	41	46	89.1304	88.4058
				Sherlock 1xDC	2	Female		2	42	44	95.4545	95.1515
				Sherlock 5xDC	2	Female		1	46	47	97.8723	97.7305
				SUMMARY
				Insecticide	% Mortality	SEM	Alive after 24 H	Dead after 24 H
				Negative control	0	0	216	15
				Permethrin control	91.8833	1.09106	49	653
				Sherlock 1xDC	93.1068	0.780809	42	576
				Sherlock 5xDC	96.7066	0.973534	20	646

## Sheet: Bioassay_FuMoz
		IVCC CDC Bottle Bioassay results Spreadsheet (An. funestus - FUMOZ lab strain)
			Species:	An fun
			Strain:	Fumoz
			Location:
			Treatment	Replicate number	Number of mosquitoes knocked down at 1h		Number dead at hours after introduction
		Date					24	total number of mosquitoes in bottle	24h % Mortality	Avg. 24h %Mortality	SEM
			Negative control	1	0		0	22	0	1.51515	1.51515
				2	0		1	22	4.54545
				3	0		0	24	0
		Date	Treatment	Replicate			24	total number of mosquitoes in bottle	24h % Mortality	Avg. 24h % Mortality	SEM
			Permethrin	1	17		22	23	95.6522	82.6087	9.05072
				2	14		20	23	86.9565
				3	14		15	23	65.2174
		Date	Treatment	Replicate			24	total number of mosquitoes in bottle	24h % Mortality	Avg. 24h %Mortality	SEM
			IVC-5743, 1xDD	1	23		21	23	91.3043	84.8359	6.05905
				2	21		19	21	90.4762
				3	22		16	22	72.7273
		Date	Treatment	Replicate			24	total number of mosquitoes in bottle	24h % Mortality	Avg. 24h %Mortality	SEM
			IVC-5743, 5xDD	1	24			24	0	66.6008	2.96443
				2	23		16	23	69.5652
				3	22		14	22	63.6364

## Sheet: Bioassay_Nkolondom
		IVCC CDC Bottle Bioassay results Spreadsheet (An. gambiae - Nkolondom)
			Species:	An gambiae
			Strain:	field (ss)
			Location:	Nkolondom, Cameroon
				Treatment	Replicate number	Number of mosquitoes knocked down at 1h		Number dead at hours after introduction
			Date			1		24 h	total number of mosquitoes in bottle	24h % Mortality	Avg. 24h % Mortality	SEM
				Negative control	1	0		1	24	4.16667	4.28744	2.51094
					2	0		2	23	8.69565
					3	0		0	25	0
					mean	0		1	24
					%mortality	0		4.16667
			Date	Treatment	Replicate	1		24 h	total number of mosquitoes in bottle	24h % Mortality	Avg. 24h % Mortality	SEM
				Permethrin	1	4		6	22	27.2727	45.4967	10.9792
					2	7		11	25	44
					3	6		15	23	65.2174
					mean	5.66667		10.6667	23.3333
					%mortality	24.2857		45.7143
			Date	Treatment	Replicate	1		24 h	total number of mosquitoes in bottle	24h % Mortality	Avg. 24h % Mortality	SEM
				IVC-5743, 1xDD	1	22		22	22	100	100	0
					2	21		21	21	100
					3	24		24	24	100
					mean	22.3333		22.3333	22.3333
					%mortality	100		100
			Date	Treatment	Replicate	1		24 h	total number of mosquitoes in bottle	24h % Mortality	Avg. 24h % Mortality	SEM
				IVC-5743, 5xDD	1	19		19	19	100	100	0
					2	23		23	23	100
					3	20		20	20	100
					mean	20.6667		20.6667	20.6667
					%mortality	100		100

## Sheet: Bioassay_Mibellon_raw
		IVCC CDC bottle bioassays - raw data (An. funestus - Mibellon field strain)
		Species	Date	Net	Sex	Expo.	1H Knockdown	24H Dead	24H Alive	Total	%Mortality	SEM
		An. funestus	16.02.22	Negative control	Female	30 minutes	0	0	15	15	0	1.5533
		Mibellon F1			Female		1	1	20	21	4.7619
				Negative control	Female		1	1	16	17	5.88235
					Female		1	0	24	24	0
				Permethrin control	Female		3	1	20	21	4.7619	9.62779
					Female		6	4	14	18	22.2222
					Female		5	3	25	28	10.7143
				Permethrin control	Female		10	17	7	24	70.8333
					Female		8	7	16	23	30.4348
				Permethrin control	Female		ɏ -6	7	12	19	36.8421
				1x DD Sherlock	Female		ɏ	29	1	30	96.6667	4.05664
					Female		ɏ	21	2	23	91.3043
					Female		ɏ	22	2	24	91.6667
					Female		ɏ	19	0	19	100
				1x DD Sherlock	Female		ɏ	23	7	30	76.6667
					Female		ɏ	25	3	28	89.2857
					Female		ɏ	26	4	30	86.6667
				1x DD Sherlock	Female		ɏ	9	9	18	50
					Female		ɏ	19	3	22	86.3636
				1x DD Sherlock	Female		ɏ	26	1	27	96.2963
					Female		ɏ	20	0	20	100
					Female		ɏ	8	0	8	100
				5x DD Sherlock	Female		ɏ	24	3	27	88.8889	1.56575
					Female		ɏ	18	4	22	81.8182
					Female		ɏ	23	1	24	95.8333
					Female		ɏ	21	2	23	91.3043
					Female		ɏ	21	0	21	100
					Female		ɏ	21	1	22	95.4545
				5x DD Sherlock	Female		ɏ	47	4	51	92.1569
					Female		ɏ	30	1	31	96.7742
					Female		ɏ	25	6	31	80.6452
				5x DD Sherlock	Female		ɏ	19	1	20	95
					Female		ɏ	17	2	19	89.4737
				5x DD Sherlock	Female		ɏ	18	1	19	94.7368
					Female		ɏ	21	0	21	100
					Female		ɏ	19	1	20	95
		60 minutes of exposure to insecticide impregnated bottles
		Species	Date	Net	Sex	Expo.	1H Knockdown	24H Dead	24H Alive	Total	%Mortality	Corrected
		An. funestus	04.02.22	Negative control	Female	60 minutes	3	3	12	15	20
		Mibellon F1		Negative control	Female		1	0	20	20	0
				Negative control	Female		2	0	18	18	0
				Negative control	Female		1	0	22	22	0
				Negative control	Female		1	2	18	20	10			SEM
				Permethrin control	Female		ɏ -2	7	8	15	46.6667	46.6667		7.16959
				Permethrin control	Female		ɏ -2	5	12	17	29.4118	29.4118
				Permethrin control	Female		ɏ -5	13	14	27	48.1481	48.1481
				Permethrin control	Female		ɏ -6	12	8	20	60	60
				Permethrin control	Female		ɏ -6	19	4	23	82.6087	82.6087
				Permethrin control	Female		ɏ -4	20	6	26	76.9231	76.9231
				Permethrin control	Female		ɏ -5	11	14	25	44	44
				1x DD Sherlock	Female		ɏ	21	0	21	100	100		0.925681
				1x DD Sherlock	Female		ɏ	22	0	22	100	100
				1x DD Sherlock	Female		ɏ	19	0	19	100	100
				1x DD Sherlock	Female		ɏ	14	0	14	100	100
				1x DD Sherlock	Female		ɏ	18	1	19	94.7368	94.7368
				1x DD Sherlock	Female		ɏ	19	1	20	95	95
				1x DD Sherlock	Female		ɏ	36	1	37	97.2973	97.2973
				5x DD Sherlock	Female		ɏ	19	0	19	100	100		1.10915
				5x DD Sherlock	Female		ɏ	22	0	22	100	100
				5x DD Sherlock	Female		ɏ	23	0	23	100	100
				5x DD Sherlock	Female		ɏ	23	0	23	100	100
				5x DD Sherlock	Female		ɏ	24	2	26	92.3077	92.3077
				5x DD Sherlock	Female		ɏ	33	1	34	97.0588	97.0588
				5x DD Sherlock	Female		ɏ	34	0	34	100	100

## Sheet: Bioassay_Mibellon_summary
	IVCC CDC Bottle Bioassay results Spreadsheet (An. funestus - Mibellon)
	Species	Date of Bioassay	Bioassay #	Insecticide	# of Replicates	Sex	Time expo.	Alive after 24 H	Dead after 24H	Total	%Mortality 24H	Corrected (Abbott's)
	An. funestus (Mibellon F1)	04.02.22	1	Negative control	5	Female	60 mins	90	5	95	5.26316	0
				Permethrin control	7	Female		66	87	153	56.8627	54.4662
				Sherlock 1xDC	7	Female		3	149	152	98.0263	97.9167
				Sherlock 5xDC	7	Female		3	178	181	98.3425	98.2505
	An. funestus (Mibellon F1)	06.02.22	2	Negative control	4	Female	30 mins	75	2	77	2.5974
				Permethrin control	6	Female		94	39	133	29.3233
				Sherlock 1xDC	12	Female		32	247	279	88.5305
				Sherlock 5xDC	14	Female		27	324	351	92.3077
				SUMMARY
				Insecticide	% Mortality	SEM	Alive after 24 H	Dead after 24 H
			60 mins	Negative control	0	0	90	5
				Permethrin control	54.4662	7.16959	66	87
				Sherlock 1xDC	97.9167	0.925681	3	149
				Sherlock 5xDC	98.2505	1.10915	3	178
			30 mins	Negative control	2.5974	1.5533	75	2
				Permethrin control	29.3233	9.62779	94	39
				Sherlock 1xDC	88.5305	4.05664	32	247
				Sherlock 5xDC	92.3077	1.56575	27	324

## Sheet: Genotype_Perm._Hybrids
	Permethrin bottles - Genotype and allele frequencies of the 6.5 kb insertion, CYP6P9a and CYP6P9b in FUMOZ/FANG hybrid mosquitoes exposed to Permethrin bottles
			Associated statistics of significance computed in GraphPad Prism v8.0.2
	Raw data
	Alive samples					Dead samples
	ID	6.5kb SV	6p9a	6p9b		ID	6.5kb	6p9a	6p9b
	AL_1	RR	RR	RR		DE_1	RR	RS	RR			Summary (6.5 kb SV)							Summary (CYP6P9a_R rflp)							Summary (CYP6P9b_R rflp)							Summary (6.5kb + CYP6P9a + CYP6P9b)
	AL_2	RR	RR	RR		DE_2	SS	RS	SS			Frequency of the 6.5 kb SV in the dead and alive hybryids							Frequency of th CYP6P9a in the dead and alive hybrids							Frequency of the CYP6P9b in the dead and alive hybrids							Frequency of the genotype combinations
	AL_3	RR	RS	RS		DE_3	RS	RS	RS				RR	RS	SS	Total				RR	RS	SS	Total				RR	RS	SS	Total				RR/RR/RR	RR/RR/RS	RR/RS/RS	RS/RS/RR	RS/RS/RS	SS/RS/SS	SS/SS/SS
	AL_4	RR	RR	RR		DE_4	SS	SS	SS			Dead	13	28	14	55			Dead	7	35	12	54			Dead	10	29	9	48			Dead	5	0	6	20	2	7	7	47
	AL_5	RR	RR	RS		DE_5	SS	SS	SS			Alive	34	3	1	38			Alive	30	7	1	38			Alive	29	7	1	37			Alive	28	1	3	3	0	1	1	37
	AL_6	RR	RR	RR		DE_6	RR	RS	RS			Total	47	31	15					37	42	13					39	36	10					33	1	9	23	2	8	8
	AL_7	RR	RR	RR		DE_7	RR	RR	RR			% Genotype frequency (6.5 kb SV)							%Genotype frequency (CYP6P9a_R )							%Genotype frequency (CYP6P9b_R)							% Genotype ferquency (6.5kb SV + CYP6P9a + CYP6P9b)
	AL_8	RR	RS	RS		DE_8	SS	SS	SS				RR	RS	SS	Totals				RR	RS	SS	Totals				RR	RS	SS	Totals				RR/RR/RR	RR/RR/RS	RR/RS/RS	RS/RS/RR	RS/RS/RS	SS/RS/SS	SS/SS/SS
	AL_9	RR	RR	RR		DE_9	RR	RR	RR			Dead	23.6364	50.9091	25.4545	100			Dead	12.963	64.8148	22.2222	100			Dead	20.8333	60.4167	18.75	100			Dead	15.1515	0	66.6667	86.9565	100	87.5	87.5
	AL_10	RR	RR	RR		DE_10	RR	RR	RR			Alive	89.4737	7.89474	2.63158	100			Alive	78.9474	18.4211	2.63158	100			Alive	78.3784	18.9189	2.7027	100			Alive	84.8485	100	33.3333	13.0435	0	12.5	12.5
	AL_11	RR	RR			DE_11	RR	RS	RS			% Genotype frequency (6.5 kb SV)							%Genotype frequency (CYP6P9a_R )							%Genotype frequency (CYP6P9b_R)
	AL_12	RR	RR	RR		DE_12	RS	RS	RS			%	RR	RS	SS				%	RR	RS	SS					RR	RS	SS
	AL_13	RR	RR	RR		DE_13	RS	RS	RS			Dead	27.6596	90.3226	93.3333				Dead	18.9189	83.3333	92.3077				Dead	25.641	80.5556	90
	AL_14	RR	RS	RR		DE_14	SS	SS	SS			Alive	72.3404	9.67742	6.66667				Alive	81.0811	16.6667	7.69231				Alive	74.359	19.4444	10
	AL_15	RS	RS	RS		DE_15	RS	RS	RS				100	100	100					100	100	100					100	100	100
	AL_16	RS	RS	RS		DE_16	RR	RS	RS
	AL_17	RR	RR	RR		DE_17	RS	RS	RS
	AL_18	RR	RR	RR		DE_18	SS	SS	SS
	AL_19	RR	RS	RS		DE_19	RS	RS	RS
	AL_20	RR	RR	RR		DE_20	RS	RS	RS
	AL_21	RR	RR	RR		DE_21	SS	SS
	AL_22	RR	RR	RR		DE_22	RS	RS	RS
	AL_23	RR	RR	RR		DE_23	RS	RS	RS
	AL_24	RR	RR	RR		DE_24	RS	RS	RS
	AL_25	RR	RR	RR		DE_25	RS	RR	RR
	AL_26	RR	RR	RR		DE_26	RR	RR	RR
	AL_27	RR	RR	RR		DE_27	RS	RS	RR
	AL_28	RS	RS	RS		DE_28	RS	RS	RS
	AL_29	RR	RR	RR		DE_29	RS	RS
	AL_30	RR	RR	RR		DE_30	RS	RS	RS																								Computed statistics (6.5kb SV + CYP6P9a + CYP6P9b)
	AL_31	SS	SS	SS		DE_31	RR	RR	RR			%Allele frequency (6.5 kb SV)							%Allele frequency (CYP6P9a_R)							%Allele frequency (CYP6P9b_R)							STAT	ODDS RATIOS	CI	p value (Fisher's exact test)
	AL_32	RR	RR	RR		DE_32	RS	RS	RS				R	S	total					R	S	total					R	S	total				RR/RR/RR vs SS/SS/SS	38.36	17.05 to 79.72	<0.0001
	AL_33	RR	RR	RR		DE_33	SS	SS	SS			Dead	49.0909	50.9091	100				Dead	45.3704	54.6296	100				Dead	51.0417	48.9583	100				RR/RR/RR vs SS/RS/SS	Infinity	145.8 to Infinity	<0.0001
	AL_34	RR	RR	RR		DE_34	SS	SS	SS			Alive	93.4211	6.57895	100				Alive	88.1579	11.8421	100				Alive	87.8378	12.1622	100				RR/RR/RR vs RS/RS/RS	37.92	16.84 to 78.85	<0.0001
	AL_35	RR	RR	RR		DE_35	RS	RS	RS																								RR/RR/RR vs RR/RS/RS	11.51	5.84 to 22.91	<0.0001
	AL_36	RR	RR	RR		DE_36	RS	RS	RS																								RR/RR/RR vs RR/RR/RS	0	0 to 0.23	<0.0001
	AL_37	RR	RR	RR		DE_37	RR	RS	RR																								RR/RR/RS vs SS/SS/SS	Infinity	169.6 to Infinity	<0.0001
	AL_38	RR	RR	RR		DE_38	RR	RS	RS																								RR/RR/RS vs SS/RS/SS	Infinity	1980 to Infinity	<0.0001
						DE_39	RS	RS	RS																								RR/RR/RS vs RS/RS/RS	Infinity	167.6 to Infinity	<0.0001
						DE_40	SS	RS	SS																								RR/RR/RS vs RR/RS/RS	Infinity	57.58 to infinity	<0.0001
						DE_41	RS	RS																									RR//RS/RS vs SS/SS/SS	3.334	1.596 to 6.56	0.0008
						DE_42	RR	RS	RS																								RR/RS/RS vs SS/RS/SS	Infinity	14.07 to Infinity	<0.0001
						DE_43	RS	RS	RS																								RR/RS/RS vs RS/RS/RS	3.296	1.58 to 6.48	0.0013
						DE_44	RS	RS	RS																								RS/RS/RS vs SS/SS/SS	1.011	0.44 to 2.32	>0.9999
						DE_45	SS	SS																									RS/RS/RS vs SS/RS/SS	Infinity	3.73 to Infinity	0.0002
						DE_46	RR	RS																									SS/RS/SS vs Ss/SS/SS	0	0 to 0.27	0.0002
						DE_47	RS	RS	RS
						DE_48	RS	RS	RS
						DE_49	SS	RS	RR			Computed statistics (6.5 kb SV)							Computed statistics (CYP6P9a_R)							Computed statistics (CYP6P9b_R)
						DE_50	RS	RR	RS			Stats	ODDS RATIOS	CI	p-value (Fisher's exact test)				Stats	ODDS RATIOS	CI	p-value (Fisher's exact test)				Stats	ODDS RATIO	CI	p-value (Fisher's exact test)
						DE_51	SS	SS	RS			RR vs RS	23.64	10.13 to 53.74	<0.0001				RR vs RS	21.94	9.941 to 47.87	<0.0001				RR vs RS	11.73	5.715 to 23.66	<0.0001
						DE_52	RS	SS	RS			RR vs SS	30.9	9.025 to 100.7	<0.0001				RR vs SS	44.56	11.20 to 149.0	<0.0001				RR vs SS	23.52	6.307 to 78.28	<0.0001
						DE_53	SS	SS	RS			RS vs SS	1.307	0.3429 to 4.856	>0.9999				RS vs SS	2.031	0.6080 to 6.983	0.3919				RS vs SS	2.006	0.5881 to 6.938	0.389
						DE_54	RS	RS				R vs S	13.83	5.834 to 34.32	<0.0001				R vs S	8.963	4.359 to 18.04	<0.0001				R vs S	7.046	3.427 to 14.15	<0.0001
						DE_55	RS
												6.5kb SV	P value and statistical significance						CYP6P9a	P value and statistical significance						CYP6P9b	P value and statistical significance
													Test	Chi-square						Test	Chi-square						Test	Chi-square
													Chi-square, df	129.0, 2						Chi-square, df	138.7, 2						Chi-square, df	106.5, 2
													P value	<0.0001						P value	<0.0001						P value	<0.0001
													P value summary	****						P value summary	****						P value summary	****

## Sheet: Genotype_1xDD_Hybrids
	1xDC-IVC5347 bottles - Genotype and allele frequencies of the 6.5 kb insertion, CYP6P9a and CYP6P9b in FUMOZ/FANG hybrid mosquitoes exposed to 1xDC Sherlock bottles
			Associated statistics of significance computed in GraphPad Prism v8.0.2
	Raw data
	Alive samples					Dead samples
	ID	6.5kb SV	6p9a	6p9b		ID	6.5kb	6p9a	6p9b
	AL_1	RR	RS	RR		DE_1	RR	RR	RS			Summary (6.5 kb SV)						Summary (CYP6P9a_R rflp)							Summary (CYP6P9b_R rflp)							Summary (6.5kb + CYP6P9a + CYP6P9b)
	AL_2	RR	RR	RR		DE_2	RS	RS	RS			Frequency of the 6.5 kb SV in the dead and alive hybryids						Frequency of th CYP6P9a in the dead and alive hybrids							Frequency of the CYP6P9b in the dead and alive hybrids							Frequency of the genotype combinations
	AL_3	RR	RR	RR		DE_3	SS	SS	RS				RR	RS	SS	Total			RR	RS	SS	Total				RR	RS	SS	Total				RR/RR/RR	RR/RR/RS	RR/RS/RS	RS/RS/RR	RS/RS/RS	SS/SS/SS	Total
	AL_4	RR	RR	RR		DE_4	SS	SS	SS			Dead	15	23	11	49		Dead	13	26	13	52			Dead	9	32	11	52			Dead	4	2	8	0	14	8	36
	AL_5	RR	RR	RR		DE_5	RR	RS	RS			Alive	26	5	0	31		Alive	21	10	0	31			Alive	21	10	0	31			Alive	18	3	4	2	3	0	30		Summary (6.5kb + CYP6P9a + CYP6P9b)
	AL_6	RR	RR	RR		DE_6	RR	RR	RR				41	28	11				34	36	13					30	42	11					22	5	12	2	17	8			Frequency of the genotype combinations
	AL_7	RR	RR	RS		DE_7	SS	SS	SS			% Genotype frequency (6.5 kb SV)						%Genotype frequency (CYP6P9a_R )							%Genotype frequency (CYP6P9b_R)							% Genotype ferquency (6.5kb SV + CYP6P9a + CYP6P9b)
	AL_8	RR	RR	RR		DE_8	RS	RS	RS				RR	RS	SS	Totals			RR	RS	SS	Totals				RR	RS	SS	Totals				RR/RR/RR	RR/RR/RS	RR/RS/RS	RS/RS/RR	RS/RS/RS	SS/SS/SS				RR/RR/RR	RR/RR/RS	RR/RS/RS	RS/RS/RS	SS/SS/SS
	AL_9	RR	RR	RR		DE_9	RR	RS	RS			Dead	30.6122	46.9388	22.449	100		Dead	25	50	25	100			Dead	17.3077	61.5385	21.1538	100			Dead	18.1818	40	66.6667	0	82.3529	100			Dead	4	2	8	14	8
	AL_10	RR	RR	RS		DE_10	RS	RS	RS			Alive	83.871	16.129	0	100		Alive	67.7419	32.2581	0	100			Alive	67.7419	32.2581	0	100			Alive	81.8182	60	33.3333	100	17.6471	0			Alive	18	3	6	3	0
	AL_11	RR	RR	RS		DE_11	RS	RS	RS			% Genotype frequency (6.5 kb SV)						%Genotype frequency (CYP6P9a_R )							%Genotype frequency (CYP6P9b_R)																	22	5	14	17	8
	AL_12	RS	RS	RS		DE_12	RS	RR	RR				RR	RS	SS				RR	RS	SS				%%%	RR	RS	SS													% Genotype ferquency (6.5kb SV + CYP6P9a + CYP6P9b)
	AL_13	RR	RR	RR		DE_13	SS	SS	SS			Dead	36.5854	82.1429	100			Dead	38.2353	72.2222	100				Dead	30	76.1905	100														RR/RR/RR	RR/RR/RS	RR/RS/RS	RS/RS/RS	SS/SS/SS
	AL_14	RR	RR	RR		DE_14	RS	RS	RS			Alive	63.4146	17.8571	0			Alive	61.7647	27.7778	0				Alive	70	23.8095	0													Dead	18.1818	40	57.1429	82.3529	100
	AL_15	RR	RS	RS		DE_15	SS	SS	SS																																Alive	81.8182	60	42.8571	17.6471	0
	AL_16	RR	RR	RR		DE_16	RR	RR	RR
	AL_17	RR	RR	RR		DE_17	RR	RS	RS
	AL_18	RR	RS	RS		DE_18	RR	RS	RR
	AL_19	RR	RR	RR		DE_19	RR	RS	RS
	AL_20	RR	RS	RS		DE_20	RS	SS	SS
	AL_21	RS	RS	RS		DE_21	RS	RS	RS
	AL_22	RS	RS	RS		DE_22	RS	RS	RS
	AL_23	RR	RR	RR		DE_23	RS	RR	RR
	AL_24	RR	RS	RS		DE_24	RS	RR	RR
	AL_25	RR	RR	RR		DE_25	SS	SS	SS
	AL_26	RS	RS	RR		DE_26	RS	RS	RS
	AL_27	RR	RR	RR		DE_27	RS	RR	RR
	AL_28	RS	RS	RR		DE_28	SS	SS	SS
	AL_29	RR	RR	RR		DE_29	RS	RS	RS			%Allele frequency (6.5 kb SV)						%Allele frequency (CYP6P9a_R)							%Allele frequency (CYP6P9b_R)
	AL_30	RR	RR	RR		DE_30	RR	RR	RR				R	S	total				R	S	total					R	S	total													Computed statistics (6.5kb SV + CYP6P9a + CYP6P9b)
	AL_31	RR	RR	RR		DE_31	SS	SS	SS			Dead	54.0816	45.9184	100			Dead	50	50	100				Dead	48.0769	51.9231	100													STAT	ODDS RATIOS	CI	p value (Fisher's exact test)
						DE_32	RR	RR	RR			Alive	91.9355	8.06452	100			Alive	83.871	16.129	100				Alive	83.871	16.129	100													RR/RR/RR vs SS/SS/SS	Infinity	120.8 to Infinity	<0.0001
						DE_33	RR	RS	RS																																RR/RR/RR vs RS/RS/RS	20.75	9.93 to 41.25	<0.0001
						DE_34	RR	RS	RS																																RR/RR/RR vs RR/RS/RS	6.039	3.13 to 11.6	<0.0001
						DE_35	RR	RR	RS																																RR/RR/RR vs RR/RR/RS	3.037	1.6 to 5.83	0.001
						DE_36	RS	RS	RS																																RR/RR/RS vs SS/SS/SS	Infinity	43.06 to Infinity	<0.0001
						DE_37	SS	SS	RS																																RR/RR/RS vs RS/RS/RS	6.83	3.53 to 13.2	<0.0001
						DE_38	RS	RR	RS																																RR/RR/RS vs RR/RS/RS	1.99	1.13 to 3.44	0.0233
						DE_39	SS	RS	RS																																RR/RS/RS vs SS/SS/SS	Infinity	21.79 to Infinity	<0.0001
						DE_40	-	RR	RS																																RR/RS/RS vs RS/RS/RS	3.44	1.77 to 6.58	0.0002
						DE_41	-	SS	SS																																RS/RS/RS vs SS/SS/SS	Infinity	5.87 to Infinity	<0.0001
						DE_42	RR	RS	RS
						DE_43	-	SS	SS
						DE_44	-	RS	RS
						DE_45	RS	RS	RS
						DE_46	RS	RS	RS
						DE_47	RS	RR	RS
						DE_48	SS	SS	SS			Computed statistics (6.5 kb SV)						Computed statistics (CYP6P9a_R)							Computed statistics (CYP6P9b_R)
						DE_49	RS	RS	RS			Stats	ODDS RATIOS	CI	p-value (Fisher's exact test)			Stats	ODDS RATIOS	CI	p-value (Fisher's exact test)				Stats	ODDS RATIOS	CI	p-value (Fisher's exact test)
						DE_50	RS	-	RS			RR vs RS	7.96	3.907 to 16.00	<0.0001			RR vs RS	4.25	2.199 to 7.807	<0.0001				RR vs RS	7.75	3.949 to 14.90	<0.0001
						DE_51	RS	RS	-			RR vs SS	Infinity	15.34 to Infinity	<0.0001			RR vs SS	Infinity	17.25 to Infinity	<0.0001				RR vs SS	Infinity	19.72 to Infinity	<0.0001
						DE_52	RR	RS	RS			RS vs SS	Infinity	1.721 to Infinity	0.0088			RS vs SS	Infinity	4.127 to Infinity	<0.0001				RS vs SS	Infinity	2.767 to Infinity	0.0008
						DE_53	RS	RS	RS			R vs S	9.796	4.352 to 20.81	<0.0001			R vs S	5.25	2.647 to 9.814	<0.0001				R vs S	5.688	2.869 to 10.64	<0.0001

## Sheet: Genotype_5xDD_Hybrids
	5xDC-IVC5347 bottles - Genotype and allele frequencies of the 6.5 kb insertion, CYP6P9a and CYP6P9b in FUMOZ/FANG hybrid mosquitoes exposed to 5xDC Sherlock bottles
			Associated statistics of significance computed in GraphPad Prism v8.0.2
	Raw data
	Alive samples					Dead samples
	ID	6.5kb SV	6p9a	6p9b		ID	6.5kb	6p9a	6p9b
	AL_1	RR	RR	RR		DE_1	RS	RS	RS				Summary (6.5 kb SV)								Summary (CYP6P9a_R rflp)								Summary (CYP6P9b_R rflp)							Summary (6.5kb + CYP6P9a + CYP6P9b)
	AL_2	RS	RR	RS		DE_2	RS	RS	RS				Frequency of the 6.5 kb SV in the dead and alive hybryids								Frequency of th CYP6P9a in the dead and alive hybrids								Frequency of the CYP6P9b in the dead and alive hybrids							Frequency of the genotype combinations
	AL_3	RR	RR	RR		DE_3	RS	RS	RS					RR	RS	SS	Total					RR	RS	SS	Total					RR	RS	SS	Total				RR/RR/RR	RR/RR/RS	RR/RS/RS	RS/RS/RS	SS/RS/SS	SS/SS/SS
	AL_4	RR	RR	RR		DE_4	RS	RS	RS				Dead	7	30	12	49				Dead	6	28	13	47				Dead	2	28	10	40			Dead	0	0	2	13	7	1	23
	AL_5	RR	RR	RR		DE_5	RS	RS	RS				Alive	16	4	0	20				Alive	17	3	0	20				Alive	16	5	0	21			Alive	14	1	0	3	0	0	18
	AL_6	RS	RS	RS		DE_6	RS	RS	RS					23	34	12						23	31	13						18	33	10					14	1	2	16	7	1
	AL_7	-	-	-		DE_7	RS	RS	RS				% Genotype frequency (6.5 kb SV)								%Genotype frequency (CYP6P9a_R )								%Genotype frequency (CYP6P9b_R)							% Genotype ferquency (6.5kb SV + CYP6P9a + CYP6P9b)
	AL_8	RR	RR	RS		DE_8	RS	RS	RS					RR	RS	SS	Totals					RR	RS	SS	Totals					RR	RS	SS	Totals			%%%	RR/RR/RR	RR/RR/RS	RR/RS/RS	RS/RS/RS	SS/RS/SS	SS/SS/SS
	AL_9	RS	RS	RS		DE_9	RS	-	RS				Dead	14.2857	61.2245	24.4898	100				Dead	12.766	59.5745	27.6596	100				Dead	5	70	25	100			Dead	0	0	100	81.25	100	100
	AL_10	RR	RR	RR		DE_10	RR	-	RS				Alive	80	20	0	100				Alive	85	15	0	100				Alive	76.1905	23.8095	0	100			Alive	100	100	0	18.75	0	0
	AL_11	RR	RR	RR		DE_11	RS	RR	RS
	AL_12	RR	-	RR		DE_12	SS	RS	SS
	AL_13	RR	RR	RR		DE_13	RS	SS	RS
	AL_14	RR	RR	RR		DE_14	RS	RS	SS
	AL_15	-	RR	RR		DE_15	SS	RS	SS
	AL_16	RR	RR	RR		DE_16	SS	SS	SS
	AL_17	RR	RR	RR		DE_17	RS	SS	RS
	AL_18	RR	RR	RR		DE_18	SS	RS	SS
	AL_19	RR	RR	RR		DE_19	RS	SS	RS
	AL_20	RR	RR	RR		DE_20	RS	RS	RS
	AL_21	RR	RR	RR		DE_21	SS	RS	SS
	AL_22	RS	RS	RS		DE_22	RS	SS	RS
						DE_23	RR	RS	RS
						DE_24	SS	RS	SS
						DE_25	RR	SS	RS
						DE_26	RS	RR	RS				%Allele frequency (6.5 kb SV)								%Allele frequency (CYP6P9a_R)								%Allele frequency (CYP6P9b_R)
						DE_27	SS	RS	SS					R	S	total						R	S	total						R	S	total				Computed statistics (6.5kb SV + CYP6P9a + CYP6P9b)
						DE_28	RS	SS	RS				Dead	44.898	55.102	100					Dead	42.5532	57.4468	100					Dead	40	60	100				STAT	ODDS RATIOS	CI	p value (Fisher's exact test)
						DE_29	RS	RS	RS				Alive	90	10	100					Alive	92.5	7.5	100					Alive	88.0952	11.9048	100				RR/RR/RR vs SS/SS/SS	Infinity	1980 to Infinity	<0.0001
						DE_30	RS	RS	RS																											RR/RR/RR vs SS/RS/SS	Infinity	1980 to Infinity	<0.0001
						DE_31	RS	RS	RS																											RR/RR/RR vs RS/RS/RS	Infinity	119.2 to Infinity	<0.0001
						DE_32	SS	RS	SS																											RR/RR/RR vs RR/RS/RS	Infinity	1980 to Infinity	<0.0001
						DE_33	RR	RS	RR																											RR/RR/RR vs RR/RR/RS			>0.9999
						DE_34	SS	SS	RR																											RR/RR/RS vs SS/SS/SS	Infinity	1980 to Infinity	<0.0001
						DE_35	RR	RR	SS																											RR/RR/RS vs SS/RS/SS	Infinity	1980 to Infinity	<0.0001
						DE_36	RS	RS	-																											RR/RR/RS vs RS/RS/RS	Infinity	119.2 to Infinity	<0.0001
						DE_37	SS	SS	-																											RR/RR/RS vs RR/RS/RS	Infinity	1980 to Infinity	<0.0001
						DE_38	RS	RS	-																											RR/RS/RS vs SS/SS/SS			>0.9999
						DE_39	RS	RR	-																											RR/RS/RS vs SS/RS/SS			>0.9999
						DE_40	RS	RR	-																											RR/RS/RS vs RS/RS/RS	0	0 to 0.17	<0.0001
						DE_41	RS	RS	-																											RS/RS/RS vs SS/SS/SS	Infinity	5.94 to Infinity	<0.0001
						DE_42	RR	RR	-																											RS/RS/RS vs SS/RS/SS	Infinity	5.94 to Infinity	<0.0001
						DE_43	-	RS	-																											SS/RS/SS vs SS/SS/SS			>0.9999
						DE_44	SS	SS	-
						DE_45	RS	RS	-				Computed statistics (6.5 kb SV)								Computed statistics (CYP6P9a_R)								Computed statistics (CYP6P9b_R)
						DE_46	RR	RS	RS				Stats	ODDS RATIOS	CI	p-value (Fisher's exact test)					Stats	ODDS RATIOS	CI	p-value (Fisher's exact test)					Stats	ODDS RATIOS	CI	p-value (Fisher's exact test)
						DE_47	RS	SS	RS				RR vs RS	17.43	8.222 to 36.77	<0.0001					RR vs RS	22.26	9.731 to 46.61	<0.0001					RR vs RS	34.83	13.44 to 86.07	<0.0001
						DE_48	RS	SS	RS				RR vs SS	Infinity	31.85 to Infinity	<0.0001					RR vs SS	Infinity	45.00 to Infinity	<0.0001					RR vs SS	Infinity	86.16 to Infinity	<0.0001
						DE_49	SS	SS	RS				RS vs SS	Infinity	1.934 to Infinity	0.0058					RS vs SS	Infinity	2.012 to Infinity	0.0045					RS vs SS	Infinity	2.725 to Infinity	0.0009
						DE_50	RS	RS	RS				R vs S	11	5.031 to 22.38	<0.0001					R vs S	18.59	7.785 to 46.37	<0.0001					R vs S	11.47	5.539 to 23.26	<0.0001

## Sheet: QRT_PCR-Hybrids
	QRT-PCR with live hybrid samples generated from bottle bioassays
	1) Input raw Ct values from the real-time PCR machine
	RAW Ct (SAMPLES)	actin	SP7	CYP6P9a	CYP6P9b		2) Input PCR Efficiencies from Standard Curves
	Neg. control_1	28.65	25.36	25.31	28.05		6P5	0.909		CYP6P9a	0.998				4) Average the technical replicates						5) Calculate the Delta Ct value (Ct Target - Ct Control)					6a) Computing the 2^-(SP7)				7a) Average of 2^-(SP7)			CYP6P9a	8) compute 2^ddCT (RSP7)							CYP6P9b	8) compute 2^ddCT (RSP7)
	Neg. control_1	29.07	24.89	25.13	27.75		SP7	1							BIOLOGICAL REPLICATES	Actin	SP7	CYP6P9a	CYP6P9b		dCt SP7					BIOLOGICAL REPLICATES	CYP6P9a	CYP6P9b		BIOLOGICAL REPLICATES	CYP6P9a	CYP6P9b		samples	2-dCt SD	2-dCt LCI	2-dCt UCI	2-ddCt (Fold-change)	2-ddCt LCI	2-ddCt Ucl		samples	2-dCt SD	2-dCt LCI	2-dCt UCI	2-ddCt (Fold-change)	2-ddCt LCI	2-ddCt Ucl
	Neg. control_1	28.7	24.54	25.03	27.71		CYP6P9b	1.005							Neg. control_1	26.806	24.93	25.1204	27.9369		BIOLOGICAL REPLICATES	CYP6P9a	CYP6P9b			Neg. control_1	0.87639	0.1244		Neg. control_1	0.884609	0.109505		Neg. control_1	0.100605	0.770766	0.998453	9.23051	0.518959	0.672261		Neg. control_1	0.0166469	0.0906673	0.128342	11.1566	0.362908	0.513707
	Neg. control_2	30.76	26.27	26.09	29.25		Actin	0.906							Neg. control_2	27.9878	25.9133	25.9292	29.0643		Neg. control_1	0.190355	3.00694			Neg. control_2	0.989072	0.112579		Permethrin_1	1.80467	0.29435		Permethrin_1	0.576416	1.1524	2.45693	18.8309	0.775915	1.65426		Permethrin_1	0.0699411	0.215205	0.373494	29.989	0.861388	1.49496
	Neg. control_2	30.16	25.96	25.93	29.09										Neg. control_3	27.3519	25.21	25.5531	28.6595		Neg. control_2	0.0158526	3.15099			Neg. control_3	0.788366	0.0915349		1xDCSherlock_1	2.21363	0.414788		1xDCSherlock_1	0.456052	1.69757	2.72969	23.0983	1.14298	1.83791		1xDCSherlock_1	0.170891	0.22141	0.608166	42.2595	0.886222	2.43427
	Neg. control_2	29.31	25.51	25.88	28.54		3) Calculate Ct values according to PCR efficiency correction; CtE = Ct*((log(E+1)/(log(2))								Permethrin_1	26.1732	24.4467	24.2549	26.6724		Neg. control_3	0.343063	3.44953			Permethrin_1	1.14213	0.21379		5xDCSherlock_1	1.48522	0.249835		5xDCSherlock_1	0.281812	1.16632	1.80411	15.4976	0.785287	1.21471		5xDCSherlock_1	0.0501272	0.193112	0.306559	25.4538	0.772958	1.22704
	Neg. control_3	29.89	25.64	25.98	28.76		RAW Ct (SAMPLES)	actin	SP7	CYP6P9a	CYP6P9b				Permethrin_2	28.9463	26.48	25.3484	28.0808		Permethrin_1	-0.191727	2.22574			Permethrin_2	2.19108	0.329696		Fang_1	0.0958353	0.00981527		Fang_1	0.0164197	0.077255	0.114416	1	0.806122	1.19388		Fang_1	0.00480958	0.00437281	0.0152577	1	0.445511	1.55449
	Neg. control_3	29.61	24.82	24.86	28.52		Neg. control_1	26.6602	25.36	25.2735	28.151				Permethrin_3	29.0145	26.7433	25.6862	28.3016		Permethrin_2	-1.13164	1.60079			Permethrin_3	2.08079	0.339563
	Neg. control_3	28.68	25.17	25.93	28.39		Neg. control_1	27.051	24.89	25.0937	27.85				1xDCSherlock_1	28.5089	26.12	24.7342	26.8363		Permethrin_3	-1.05713	1.55825			1xDCSherlock_1	2.61308	0.608646
	Permethrin_1	27.68	24.39	24.07	26.62		Neg. control_1	26.7067	24.54	24.9939	27.8098				1xDCSherlock_2	29.5573	27.8867	26.6781	29.4022		1xDCSherlock_1	-1.38575	0.716324			1xDCSherlock_2	2.31107	0.349767
	Permethrin_1	28.33	24.38	24.47	26.56		Neg. control_2	28.6237	26.27	26.0523	29.3554				1xDCSherlock_3	27.9444	25.9133	25.1337	27.7195		1xDCSherlock_2	-1.20856	1.51553			1xDCSherlock_3	1.71673	0.285951
	Permethrin_1	28.37	24.57	24.33	26.55		Neg. control_2	28.0653	25.96	25.8926	29.1948				5xDCSherlock_1	30.3452	26.6633	26.2687	28.5023		1xDCSherlock_3	-0.779664	1.80616			5xDCSherlock_1	1.31461	0.279521
	Permethrin_2	31.32	26.45	25.36	27.9		Neg. control_2	27.2744	25.51	25.8426	28.6428				5xDCSherlock_2	31.0617	26.0267	25.1703	27.8734		5xDCSherlock_1	-0.394638	1.83897			5xDCSherlock_2	1.81049	0.278025
	Permethrin_2	30.56	26.31	No Ct	27.98		Neg. control_3	27.8141	25.64	25.9425	28.8636				5xDCSherlock_3	28.3073	24.8633	24.4513	27.2445		5xDCSherlock_2	-0.856384	1.84671			5xDCSherlock_3	1.33054	0.19196
	Permethrin_2	31.44	26.68	25.41	28.06		Neg. control_3	27.5535	24.82	24.8241	28.6227				Fang_1	25.3636	23.9067	27.0875	30.7905		5xDCSherlock_3	-0.412011	2.38112			Fang_1	0.110273	0.00846749
	Permethrin_3	30.79	26.79	25.58	28.23		Neg. control_3	26.6881	25.17	25.8926	28.4923				Fang_2	25.8165	23.39	27.0709	30.8139		Fang_1	3.18084	6.88385			Fang_2	0.0779737	0.00582335
	Permethrin_3	31.14	26.53	25.88	28.11		Permethrin_1	25.7576	24.39	24.0353	26.7159				Fang_3	24.9387	24.8067	28.1393	30.8507		Fang_2	3.68087	7.42393			Fang_3	0.099259	0.015155
	Permethrin_3	31.61	26.91	25.71	28.26		Permethrin_1	26.3624	24.38	24.4347	26.6557										Fang_3	3.33266	6.04407							7a) Average of 2^-(Actin)				8) compute 2^ddCT(Actin)								8) compute 2^ddCT(Actin)
	1xDCSherlock_1	30.51	26.98	24.71	26.67		Permethrin_1	26.3997	24.57	24.2949	26.6456																			BIOLOGICAL REPLICATES	CYP6P9a	CYP6P9b		samples	2-dCt SD	2-dCt LCI	2-dCt UCI	2-ddCt (Fold-change)	2-ddCt LCI	2-ddCt Ucl		samples	2-dCt SD	2-dCt LCI	2-dCt UCI	2-ddCt (Fold-change)	2-ddCt LCI	2-ddCt Ucl
	1xDCSherlock_1	30.44	25.65	24.87	26.69		Permethrin_2	29.1448	26.45	25.3234	28.0005										dCt ACTIN									Neg. control_1	3.62069	0.444922		Neg. control_1	0.490017	3.06619	4.17518	13.076	0.101406	0.138083		Neg. control_1	0.036522	0.403594	0.48625	18.7575	0.0818555	0.0986194
	1xDCSherlock_1	30.96	25.73	24.73	26.86		Permethrin_2	28.4376	26.31	#VALUE!	28.0808										BIOLOGICAL REPLICATES	CYP6P9a	CYP6P9b			6b) Computing the 2^-(actin)				Permethrin_1	8.64397	1.38951		Permethrin_1	4.33712	3.73615	13.5518	31.2175	0.123563	0.448188		Permethrin_1	0.597664	0.713202	2.06582	58.5805	0.144649	0.418982
	1xDCSherlock_2	31.51	27.92	26.71	29.34		Permethrin_2	29.2564	26.68	25.3733	28.1611										Neg. control_1	-1.68563	1.13095			BIOLOGICAL REPLICATES	CYP6P9a	CYP6P9b		1xDCSherlock_1	9.35327	1.82333		1xDCSherlock_1	3.75627	5.10273	13.6038	33.7791	0.168759	0.449909		1xDCSherlock_1	1.182	0.485795	3.16087	76.87	0.0985271	0.641075
	1xDCSherlock_2	31.94	27.9	26.7	29.39		Permethrin_3	28.6516	26.79	25.5431	28.3317										Neg. control_2	-2.0586	1.07654			Neg. control_1	3.21682	0.456614		5xDCSherlock_1	30.2368	4.93057		5xDCSherlock_1	25.2495	1.6648	58.8088	109.2	0.0550586	1.94494		5xDCSherlock_1	3.70084	0.742754	9.11838	207.868	0.150643	1.84936
	1xDCSherlock_2	31.84	27.84	26.74	29.16		Permethrin_3	28.9773	26.53	25.8426	28.2113										Neg. control_3	-1.79885	1.30762			Neg. control_2	4.16582	0.474166		Fang_1	0.276895	0.0237197		Fang_1	0.156809	0.0994522	0.454338	1	0.359169	1.64083		Fang_1	0.0073607	0.0153904	0.0320489	1	0.648845	1.35115
	1xDCSherlock_3	30.39	26	25.18	27.78		Permethrin_3	29.4146	26.91	25.6729	28.3618										Permethrin_1	-1.91828	0.499185			Neg. control_3	3.47942	0.403986
	1xDCSherlock_3	30.16	25.87	25.1	27.6		1xDCSherlock_1	28.391	26.98	24.6743	26.7661										Permethrin_2	-3.59789	-0.86546			Permethrin_1	3.77971	0.707506
	1xDCSherlock_3	29.54	25.87	25.23	27.48		1xDCSherlock_1	28.3259	25.65	24.8341	26.7861										Permethrin_3	-3.32829	-0.712907			Permethrin_2	12.108	1.82192
	5xDCSherlock_1	32.61	26.97	25.73	27.8		1xDCSherlock_1	28.8098	25.73	24.6943	26.9568										1xDCSherlock_1	-3.77465	-1.67257			Permethrin_3	10.0442	1.6391
	5xDCSherlock_1	No Ct	26.3	26.47	28.56		1xDCSherlock_2	29.3216	27.92	26.6714	29.4457										1xDCSherlock_2	-2.87921	-0.15511			1xDCSherlock_1	13.6862	3.18782
	5xDCSherlock_1	No Ct	26.72	26.72	28.84		1xDCSherlock_2	29.7217	27.9	26.6615	29.4959										1xDCSherlock_3	-2.81069	-0.224866			1xDCSherlock_2	7.35745	1.11351
	5xDCSherlock_2	30.63	25.72	24.98	27.52		1xDCSherlock_2	29.6287	27.84	26.7014	29.265										5xDCSherlock_1	-4.07648	-1.84287			1xDCSherlock_3	7.0162	1.16867
	5xDCSherlock_2	33.56	26.04	24.97	27.65		1xDCSherlock_3	28.2794	26	25.1437	27.8801										5xDCSherlock_2	-5.89141	-3.18832			5xDCSherlock_1	16.8711	3.58723
	5xDCSherlock_2	35.95	26.32	25.67	28.15		1xDCSherlock_3	28.0653	25.87	25.0638	27.6994										5xDCSherlock_3	-3.85595	-1.06282			5xDCSherlock_2	59.3598	9.11547
	5xDCSherlock_3	28.55	24.66	24.31	26.48		1xDCSherlock_3	27.4884	25.87	25.1936	27.579										Fang_1	1.72387	5.42688			5xDCSherlock_3	14.4796	2.08901
	5xDCSherlock_3	30.94	24.85	24.42	26.87		5xDCSherlock_1	30.3452	26.97	25.6929	27.9001										Fang_2	1.25436	4.99743			Fang_1	0.302735	0.023246
	5xDCSherlock_3	31.77	25.08	24.73	28.09		5xDCSherlock_1	#VALUE!	26.3	26.4318	28.6629										Fang_3	3.20063	5.91204			Fang_2	0.419179	0.0313058
	Fang_1	27.95	23.8	26.78	30.69		5xDCSherlock_1	#VALUE!	26.72	26.6814	28.9439															Fang_3	0.108771	0.0166072
	Fang_1	27.41	24.15	27.38	31.04		5xDCSherlock_2	28.5027	25.72	24.9439	27.6191
	Fang_1	26.41	23.77	27.22	30.31		5xDCSherlock_2	31.2292	26.04	24.934	27.7496
	Fang_2	28.64	23.46	26.83	31.02		5xDCSherlock_2	33.4532	26.32	25.6329	28.2514																							8) compute 2^ddCT(Actin+RSP7)								8) compute 2^ddCT(Actin+RSP7)
	Fang_2	27.56	23.45	27.24	31.09		5xDCSherlock_3	26.5671	24.66	24.2749	26.5754															6c) Computing the 2^-(SP7+2^-dCt ACTIN)/2)				7c) Average (Combined)			CYP6P9a	RSP7/Actin	CYP6P9a						CYP6P9b	RSP7/Actin	CYP6P9b
	Fang_2	27.03	23.26	27.26	30		5xDCSherlock_3	28.7912	24.85	24.3848	26.9668															BIOLOGICAL REPLICATES	CYP6P9a	CYP6P9b		BIOLOGICAL REPLICATES	CYP6P9a	CYP6P9b		samples	2-dCt SD	2-dCt LCI	2-dCt UCI	2-ddCt (Fold-change)	2-ddCt LCI	2-ddCt Ucl		samples	2-dCt SD	2-dCt LCI	2-dCt UCI	2-ddCt (Fold-change)	2-ddCt LCI	2-ddCt Ucl
	Fang_3	26.97	24.69	27.86	30.92		5xDCSherlock_3	29.5635	25.08	24.6943	28.1912															Neg. control_1	2.0466	0.290507		Neg. control_1	2.25265	0.277213		Neg. control_1	0.284648	1.93054	2.57475	12.0873	0.227151	0.302949		Neg. control_1	0.0255473	0.248304	0.306122	16.5328	0.161559	0.199178
	Fang_3	26.83	24.66	28.4	30.1		Fang_1	26.0088	23.8	26.7413	30.8006															Neg. control_2	2.57744	0.293373		Permethrin_1	6.60601	1.03257		Permethrin_1	2.45412	3.82897	9.38306	35.4466	0.450522	1.10402		Permethrin_1	0.333019	0.655732	1.40941	61.5818	0.42665	0.917029
	Fang_3	26.6	25.07	28.28	31.2		Fang_1	25.5063	24.15	27.3405	31.1518															Neg. control_3	2.13389	0.24776		1xDCSherlock_1	4.60037	0.729473		1xDCSherlock_1	2.06247	2.2665	6.93423	24.6847	0.26668	0.815891		1xDCSherlock_1	0.674786	-0.0341053	1.49305	43.5053	-0.0221905	0.971451
	Negative	No Ct	No Ct	29.89	30.95		Fang_1	24.5758	23.77	27.1807	30.4192															Permethrin_1	2.46092	0.460648		5xDCSherlock_1	8.49896	1.53693		5xDCSherlock_1	12.7653	-5.94605	22.944	45.6038	-0.699621	2.69962		5xDCSherlock_1	1.8669	-0.575627	3.64949	91.6615	-0.374531	2.37453
							Fang_2	26.6509	23.46	26.7913	31.1317															Permethrin_2	7.14955	1.07581		Fang_1	0.186365	0.0167675		Fang_1	0.0743551	0.102226	0.270504	1	0.548525	1.45147		Fang_1	0.00155638	0.0150063	0.0185286	1	0.894964	1.10504
							Fang_2	25.6459	23.45	27.2007	31.202															Permethrin_3	6.06248	0.989333
							Fang_2	25.1527	23.26	27.2207	30.1081															1xDCSherlock_1	8.14962	1.89823
							Fang_3	25.0969	24.69	27.8198	31.0314															1xDCSherlock_2	4.83426	0.731637
							Fang_3	24.9666	24.66	28.359	30.2084															1xDCSherlock_3	4.36647	0.72731
							Fang_3	24.7526	25.07	28.2392	31.3124															5xDCSherlock_1	9.09284	1.93338
																										5xDCSherlock_2	30.5851	4.69675
																										5xDCSherlock_3	7.90508	1.14048
																										Fang_1	0.206504	0.0158567
																										Fang_2	0.248576	0.0185646
																										Fang_3	0.104015	0.0158811
																															BIOLOGICAL REPLICATES	CYP6P9a	CYP6P9b			Standard Deviation
																															Neg. control_1	10.9817	17.3257			sdev	6P9a	6P9b
																															Neg. control_2	13.8301	17.4965			Neg. control	1.52737	1.52363
																															Neg. control_3	11.4501	14.7763			Permethrin	4.12457	3.64676
																															Permethrin_1	13.2048	27.4727			1xDCSherlock	1.77491	0.182469
																															Permethrin_2	38.3631	64.1605			5xDCSherlock_1	4.5066	33.4373
																															Permethrin_3	32.5301	59.0032			Mean Fold changes
																															1xDCSherlock_1	43.7293	113.209			mean	6P9a	6P9b
																															1xDCSherlock_2	25.9397	43.6343			Neg. control_1	12.0873	16.5328
																															1xDCSherlock_3	23.4296	43.3763			Permethrin_1	35.4466	61.5818
																															5xDCSherlock_1	48.7904	115.305			1xDCSherlock_1	24.6847	43.5053
																															5xDCSherlock_2	164.114	280.111			5xDCSherlock_1	45.6038	91.6615
																															5xDCSherlock_3	42.4171	68.0177
																															Fang_1	0.186365	0.0167675
																															Computed statistics
																															stats (a))	t-statistic	CI	p
																															5x vs neg	12.967	25.66 to 42.34	p=0.001
																															1x vs neg	8.866	8.33 to 17.67	p=0.003
																															perm vs neg	9.453	15.26 to 30.74	p=0.0025
																															5x vs 1x	min6.128	min35.75 to min6.25	p=0.0256
																															5x vs perm	minus2.555	min29.52 to 7.52	p=0.125
																															perm vs 1x	3.158	minus3.63 to 23.62	p=0.0873
																															stats (b))	t	CI	p
																															5x vs neg	4.252	18.87 to 131.14	p=0.0238
																															1x vs neg	24.043	23.43 to 30.57	0.0002
																															perm vs neg	20.433	37.99 to 52.01	p=0.0003
																															5x vs 1x	2.032	min53.62 to 149.62	p=0.1792
																															5x vs perm	min1.263	min132.21 to 72.21	p=0.3339
																															perm vs 1x	7.06	7.03 to 28.97	p=0.0195

[truncated: 1 more sheets: QRT_PCR-Mibellon]
