# Supplementary material for: The duplicated cytochrome P450 CYP6P9a/b confers cross-resistance to a mitochondrial complex I inhibitor in the African malaria vector Anopheles funestus
Source: BMC Genomics. 2025 Sep 26;26:837. doi: 10.1186/s12864-025-11984-1 (PMC12465288; doi:10.1186/s12864-025-11984-1)
Supplement: Supplementary file 3 — Supplementary Material 3 [file 12864_2025_11984_MOESM3_ESM.xlsx]

## Sheet: WHO cone_FZ_FG hybrids
	WHO cone bioassay with FUMOZ/FANG hybrids (raw data)
	Species	Date	Net	Sex	Expo.	1H Knockdown	24H Dead	24H Alive	Total	%Mortality	Average
	F6	2021-07-02	Control nets	F1	3 mins.	0	0	11	11	0	0
	F6	2021-07-02	Control nets	F2		0	0	11	11	0
	F6	2021-07-02	Control nets	F3		0	0	11	11	0					Summary
	F6	2021-07-04	Control nets	F1	3 mins.	1	1	7	8	12.5	2.5					Alive	Dead	%Mortality 24h	SEM
	F6	2021-07-04	Control nets	F2		1	0	11	11	0					Control net	205	4	1.95833	0.91542
	F6	2021-07-04	Control nets	F3		1	0	12	12	0					Permanet 2.0	183	40	17.1217	3.54502
	F6	2021-07-04	Control nets	F4		0	0	10	10	0					Permanet 3.0 (Side)	128	61	32.2748	4.63432
	F6	2021-07-04	Control nets	F5		1	0	9	9	0					Permanet 3.0 (Top)	5	135	96.461	1.55476
	F6	2021-07-07	Control nets	F1	3 mins.	1	1	11	12	8.33333	3.80952				Sherlock net	200	52	20.9466	4.90711
	F6	2021-07-07	Control nets	F2		1	0	10	10	0
	F6	2021-07-07	Control nets	F3		1	1	9	10	10
	F6	2021-07-07	Control nets	F4		1	1	11	12	8.33333
	F6	2021-07-07	Control nets	F5		1	0	10	10	0
	F6	2021-07-07	Control nets	F6		1	0	12	12	0
	F6	2021-07-07	Control nets	F7		1	0	14	14	0
	F6	2021-07-09	Control nets	F1	3 mins.	0	0	9	9	0	0
	F6	2021-07-09	Control nets	F2		0	0	7	7	0
	F6	2021-07-09	Control nets	F3		0	0	12	12	0
	F6	16.07.21	Control nets	F1	3 mins.	0	0	8	8	0	0
	F6	16.07.21	Control nets	F2		0	0	10	10	0
	F6	2021-07-02	Permanet 2.0	F1	3 mins.	ɏ - 5	3	8	11	27.2727	12.1212
	F6	2021-07-02	Permanet 2.0	F2		ɏ - 3	1	10	11	9.09091
	F6	2021-07-02	Permanet 2.0	F3		ɏ - 6	0	11	11	0
	F6	2021-07-04	Permanet 2.0	F1	3 mins.	1	0	10	10	0	22.6263
	F6	2021-07-04	Permanet 2.0	F2		3	3	8	11	27.2727
	F6	2021-07-04	Permanet 2.0	F3		3	1	8	9	11.1111
	F6	2021-07-04	Permanet 2.0	F4		1	1	8	9	11.1111
	F6	2021-07-04	Permanet 2.0	F5		5	7	4	11	63.6364
	F6	2021-07-07	Permanet 2.0	F1	3 mins.	ɏ - 5	0	11	11	0	14.7464
	F6	2021-07-07	Permanet 2.0	F2		ɏ - 5	3	9	12	25
	F6	2021-07-07	Permanet 2.0	F3		ɏ - 6	2	12	14	14.2857
	F6	2021-07-07	Permanet 2.0	F4		ɏ - 3	3	8	11	27.2727
	F6	2021-07-07	Permanet 2.0	F5		ɏ - 8	1	9	10	10
	F6	2021-07-07	Permanet 2.0	F6		ɏ - 6	1	9	10	10
	F6	2021-07-07	Permanet 2.0	F7		ɏ - 5	2	10	12	16.6667
	F6	2021-07-09	Permanet 2.0	F1	3 mins.	ɏ - 3	6	7	13	46.1538	23.5839
	F6	2021-07-09	Permanet 2.0	F2		4	2	9	11	18.1818
	F6	2021-07-09	Permanet 2.0	F3		3	0	9	9	0
	F6	2021-07-09	Permanet 2.0	F4		4	3	7	10	30
	F6	16.07.21	Permanet 2.0	F1	3 mins.	4	0	9	9	0	6.25
	F6	16.07.21	Permanet 2.0	F2		5	1	7	8	12.5
	F6	2021-07-04	Permanet 3.0 (Side)	F1	3 mins.	ɏ - 4	5	5	10	50	33.3333
	F6	2021-07-04	Permanet 3.0 (Side)	F2		ɏ - 2	5	5	10	50
	F6	2021-07-04	Permanet 3.0 (Side)	F3		5	3	6	9	33.3333
	F6	2021-07-04	Permanet 3.0 (Side)	F4		ɏ - 03	0	12	12	0
	F6	2021-07-07	Permanet 3.0 (Side)	F1	3 mins.	6	4	7	11	36.3636	32.8463
	F6	2021-07-07	Permanet 3.0 (Side)	F2		7	3	9	12	25
	F6	2021-07-07	Permanet 3.0 (Side)	F3		4	2	10	12	16.6667
	F6	2021-07-07	Permanet 3.0 (Side)	F4		6	5	6	11	45.4545
	F6	2021-07-07	Permanet 3.0 (Side)	F5		ɏ - 1	8	6	14	57.1429
	F6	2021-07-07	Permanet 3.0 (Side)	F6		7	3	11	14	21.4286
	F6	2021-07-07	Permanet 3.0 (Side)	F7		ɏ - 3	5	9	14	35.7143
	F6	2021-07-07	Permanet 3.0 (Side)	F8		ɏ - 2	3	9	12	25
	F6	2021-07-09	Permanet 3.0 (side)	F1	3 mins.	2	1	10	11	9.09091	27.5758
	F6	2021-07-09	Permanet 3.0 (side)	F2		3	1	9	10	10
	F6	2021-07-09	Permanet 3.0 (side)	F3		ɏ - 2	7	4	11	63.6364
	F6	16.07.21	Permanet 3.0 (side)	F1	3 mins.	ɏ - 2	1	6	7	14.2857	34.9206
	F6	16.07.21	Permanet 3.0 (side)	F2		ɏ - 1	5	4	9	55.5556
	F6	2021-07-04	Permanet 3.0 (Top)	F1	3 mins.	ɏ -	11	0	11	100	95.4545
	F6	2021-07-04	Permanet 3.0 (Top)	F2		ɏ	10	0	10	100
	F6	2021-07-04	Permanet 3.0 (Top)	F3		ɏ	10	1	11	90.9091
	F6	2021-07-04	Permanet 3.0 (Top)	F4		ɏ	10	1	11	90.9091
	F6	2021-07-04	Permanet 3.0 (Top)	F5		ɏ	5	7	12	41.6667
	F6	2021-07-07	Permanet 3.0 (Top)	F1	3 mins.	ɏ	13	0	13	100	96.9643
	F6	2021-07-07	Permanet 3.0 (Top)	F2		ɏ	11	0	11	100
	F6	2021-07-07	Permanet 3.0 (Top)	F3		ɏ - 1	9	1	10	90
	F6	2021-07-07	Permanet 3.0 (Top)	F4		ɏ	9	0	9	100
	F6	2021-07-07	Permanet 3.0 (Top)	F5		ɏ	14	0	14	100
	F6	2021-07-07	Permanet 3.0 (Top)	F6		ɏ	12	0	12	100
	F6	2021-07-07	Permanet 3.0 (Top)	F7		ɏ - 1	12	2	14	85.7143
	F6	2021-07-07	Permanet 3.0 (Top)	F8		ɏ	14	0	14	100
	F6	2021-07-02	Sherlock net	F1	3 mins.	ɏ - 1	9	2	11	81.8182	70.7071
	F6	2021-07-02	Sherlock net	F2		ɏ	8	4	12	66.6667
	F6	2021-07-02	Sherlock net	F3		ɏ	7	4	11	63.6364
	F6	2021-07-04	Sherlock net	F1	3 mins.	ɏ - 5	1	10	11	9.09091	24.2424
	F6	2021-07-04	Sherlock net	F2		ɏ - 5	3	6	9	33.3333
	F6	2021-07-04	Sherlock net	F3		ɏ - 3	3	8	11	27.2727
	F6	2021-07-04	Sherlock net	F4		ɏ - 2	4	8	12	33.3333
	F6	2021-07-04	Sherlock net	F5		ɏ - 4	2	9	11	18.1818
	F6	2021-07-07	Sherlock net	F1	3 mins.	ɏ - 7	1	11	12	8.33333	10.7343
	F6	2021-07-07	Sherlock net	F2		ɏ - 4	1	9	10	10
	F6	2021-07-07	Sherlock net	F3		ɏ - 5	1	11	12	8.33333
	F6	2021-07-07	Sherlock net	F4		ɏ - 5	2	9	11	18.1818
	F6	2021-07-07	Sherlock net	F5		ɏ - 4	4	8	12	33.3333
	F6	2021-07-07	Sherlock net	F6		ɏ - 3	1	12	13	7.69231
	F6	2021-07-07	Sherlock net	F7		ɏ - 6	0	13	13	0
	F6	2021-07-07	Sherlock net	F8		ɏ - 7	0	14	14	0
	F6	2021-07-09	Sherlock net	F1	3 mins.	ɏ - 3	0	11	11	0	6.55844
	F6	2021-07-09	Sherlock net	F2		ɏ - 2	1	9	10	10
	F6	2021-07-09	Sherlock net	F3		ɏ - 3	1	10	11	9.09091
	F6	2021-07-09	Sherlock net	F4		ɏ - 5	1	13	14	7.14286
	F6	16.07.21	Sherlock net	F1	3 mins.	ɏ - 4	0	8	8	0	7.69231
	F6	16.07.21	Sherlock net	F2		ɏ - 2	2	11	13	15.3846
	Name: By Theofelix and Ebai
	Age of Mosquitoes: 2 - 5 days old
	Conditions: 25oC, 80%RH

## Sheet: cone_FZ_FG_hybrids summary
	WHO cone bioassay with FUMOZ/FANG hybrids (summarized)
	Species	Date of Bioassay	Bioassay No.	Insecticide	No. of Replicates	Sex	Time expo.	Alive after 24 H	Dead after 24 H	% Mortality
	FUMOZ/FANG F6	16.07.21	1	Control nets	2	Females	3 mins.	18	0	0
				Permanet 2.0	2	Females		16	1	5.88235
				Permanet 3.0 (side)	2	Females		10	6	37.5
				Sherlock net (0.7% of incorporated Sherlock)	2	Females		19	2	9.52381
		2021-07-02	2	Control nets	3	Females	3 mins.	33	0	0
				Permanet 2.0	3	Females		29	4	12.1212
				Sherlock net (0.7% of incorporated Sherlock)	3	Females		10	24	70.5882
		2021-07-04	3	Control nets	5	Females	3 mins.	49	1	2
				Permanet 2.0	5	Females		38	12	24
				Permanet 3.0 (Side)	4	Females		28	13	31.7073
				Permanet 3.0 (Top)	5	Females		2	41	95.3488
				Sherlock net (0.7% of incorporated Sherlock)	5	Females		41	13	24.0741
		2021-07-07	4	Control nets	7	Females	3 mins.	77	3	3.75
				Permanet 2.0	7	Females		68	12	15
				Permanet 3.0 (Side)	8	Females		67	33	33
				Permanet 3.0 (Top)	8	Females		3	94	96.9072
				Sherlock net (0.7% of incorporated Sherlock)	8	Females		87	10	10.3093
		2021-07-09	5	Control nets	3	Females	3 mins.	28	0	0
				Permanet 2.0	3	Females		32	11	25.5814
				Permanet 3.0 (side)	3	Females		23	9	28.125
				Sherlock net (0.7% of incorporated Sherlock)	4	Females		43	3	6.52174
				SUMMARY
				Insecticide	% Mortality	Standard error of the mean	Alive after 24 H	Dead after 24 H
				Control nets	1.15	0.756637	0	166
				Permanet 2.0	16.517	3.69377	0	120
				Permanet 3.0 (Side)	32.5831	1.93631	0	176
				Permanet 3.0 (Top)	96.128	0.77919	0	87
				Sherlock net (0.7% of incorporated Sherlock)	24.2034	11.9849	3	26
		Name: By Theofelix and Ebai
		Age of Mosquitoes: 2 - 5 days old
		Conditions: 25oC, 80%RH

## Sheet: WHO cone _ Mibellon strains
	WHO cone bioassays with F1 An. funestus from the Mibellon
	Species	Date	Net	Sex	Expo.	1H Knockdown	24H Dead	24H Alive	Total	%Mortality 24h	Average
	An. funestus	05.02.22	Control nets	F1	3 minutes	1	0	8	8	0	1.81818
	Mib. F1	05.02.22	Control nets	F2		0	1	10	11	9.09091				Summary
		05.02.22	Control nets	F3		0	0	10	10	0					Alive	Dead	%Mortality 24h	Error
		05.02.22	Control nets	F4		0	0	10	10	0				Control net	125	3	2.34848	1.22816
		05.02.22	Control nets	F5		1	0	10	10	0				Permanet 2.0	110	20	16.672	5.53485
		08.02.22	Control nets	F1		0	1	9	10	10	4.77273			Permanet 3.0 (side)	134	12	8.70888	3.09211
		08.02.22	Control nets	F2		1	1	10	11	9.09091				PermanNet 3.0 (top)	0	129	100	0
		08.02.22	Control nets	F3		0	0	9	9	0				Sherlock net	157	16	10.6801	3.05281
		08.02.22	Control nets	F4		0	0	10	10	0
		10.02.22	Control nets	F1		0	0	11	11	0	0
		10.02.22	Control nets	F2		0	0	12	12	0
		10.02.22	Control nets	F3		1	0	16	16	0
		05.02.22	Permanet 2.0	F1		0	0	13	13	0	6.25
		05.02.22	Permanet 2.0	F2		1	8	5	13	61.5385
		05.02.22	Permanet 2.0	F3		0	0	13	13	0
		05.02.22	Permanet 2.0	F4		1	0	17	17	0
		05.02.22	Permanet 2.0	F5		0	2	6	8	25
		08.02.22	Permanet 2.0	F1		0	2	6	8	25	8.33333
		08.02.22	Permanet 2.0	F2		0	6	4	10	60
		08.02.22	Permanet 2.0	F3		0	0	10	10	0
		08.02.22	Permanet 2.0	F4		0	0	14	14	0
		10.02.22	Permanet 2.0	F1		3	7	6	13	53.8462	33.3479
		10.02.22	Permanet 2.0	F2		4	8	2	10	80
		10.02.22	Permanet 2.0	F3		3	2	9	11	18.1818
		10.02.22	Permanet 2.0	F4		3	3	9	12	25
		10.02.22	Permanet 2.0	F5		4	4	7	11	36.3636
		05.02.22	Permanet 3.0 (side)	F2		1	1	12	13	7.69231
		05.02.22	Permanet 3.0 (side)	F3		0	0	12	12	0
		05.02.22	Permanet 3.0 (side)	F4		0	0	13	13	0
		05.02.22	Permanet 3.0 (side)	F5		0	1	12	13	7.69231
		08.02.22	Permanet 3.0 (side)	F1		0	0	11	11	0	7.47863
		08.02.22	Permanet 3.0 (side)	F2		0	1	12	13	7.69231
		08.02.22	Permanet 3.0 (side)	F3		0	2	7	9	22.2222
		08.02.22	Permanet 3.0 (side)	F4		0	0	16	16	0
		10.02.22	Permanet 3.0 (side)	F1		1	1	12	13	7.69231	14.8019
		10.02.22	Permanet 3.0 (side)	F2		0	0	10	10	0
		10.02.22	Permanet 3.0 (side)	F3		2	2	9	11	18.1818
		10.02.22	Permanet 3.0 (side)	F4		1	4	8	12	33.3333
		05.02.22	PermanNet 3.0 (top)	F1		ɏ	14	0	14	100	100
		05.02.22	PermanNet 3.0 (top)	F2		ɏ	14	0	14	100
		05.02.22	PermanNet 3.0 (top)	F3		ɏ	8	0	8	100
		05.02.22	PermanNet 3.0 (top)	F4		ɏ	15	0	15	100
		05.02.22	PermanNet 3.0 (top)	F5		ɏ	12	0	12	100
		08.02.22	PermanNet 3.0 (top)	F1		ɏ	14	0	14	100	100
		08.02.22	PermanNet 3.0 (top)	F2		ɏ	9	0	9	100
		08.02.22	PermanNet 3.0 (top)	F3		ɏ	12	0	12	100
		08.02.22	PermanNet 3.0 (top)	F4		ɏ	10	0	10	100
		10.02.22	PermanNet 3.0 (top)	F1		ɏ	10	0	10	100	100
		10.02.22	PermanNet 3.0 (top)	F2		ɏ	11	0	11	100
		05.02.22	Sherlock net	F1		ɏ -6	0	16	16	0	5.95238
		05.02.22	Sherlock net	F2		ɏ -3	1	13	14	7.14286
		05.02.22	Sherlock net	F3		ɏ -2	2	12	14	14.2857
		05.02.22	Sherlock net	F4		ɏ -4	0	16	16	0
		05.02.22	Sherlock net	F5		ɏ -4	1	11	12	8.33333
		08.02.22	Sherlock net	F1		ɏ -6	2	8	10	20	16.4583
		08.02.22	Sherlock net	F2		ɏ -3	1	11	12	8.33333
		08.02.22	Sherlock net	F3		ɏ -2	3	5	8	37.5
		08.02.22	Sherlock net	F4		ɏ -4	0	13	13	0
		10.02.22	Sherlock net	F1		0	1	13	14	7.14286	10.7852
		10.02.22	Sherlock net	F2		2	1	10	11	9.09091
		10.02.22	Sherlock net	F3		5	3	7	10	30
		10.02.22	Sherlock net	F4		2	1	12	13	7.69231
		10.02.22	Sherlock net	F5		2	0	10	10	0
	Name: By Theofelix
	Age of Mosquitoes: 2 - 5 days old
	Conditions: 24oC, 51%RH

## Sheet: WHO cone_FuMoz
		WHO cone assay with FUMOZ pyrethroid-resistant laboratory strain
		Start Date of BioAssay	Type mosquitoes	NET	Time of exposition	Gender	Tube	Knock down after 60min	DEAD at 24h	ALIVE at 24h	Total	% Mortality	KD %	Average	Mortality Error	KD error
		2021-03-18	Fumoz	Control	3min	Female	1	0	0	12	12	0	0
		2021-03-18	Fumoz	Control	3min	Female	2	0	0	10	10	0	0
		2021-03-18	Fumoz	Control	3min	Female	3	0	0	11	11	0	0
		2021-03-18	Fumoz	Control	3min	Female	4	0	0	11	11	0	0
		2021-03-18	Fumoz	Control	3min	Female	5	0	0	10	10	0	0	0	0	0
								0	0	54	54		0						Summary
												Mortality 24h
		2021-03-18	Fumoz	PermaNet 2.0	3min	Female	1	0	0	10	10	0	0							Knock down%	Mortality 24h %	Error 24h	Error KD
		2021-03-18	Fumoz	PermaNet 2.0	3min	Female	2	0	0	10	10	0	0						Control	0	0	0	0
		2021-03-18	Fumoz	PermaNet 2.0	3min	Female	3	0	0	9	9	0	0						PermaNet 2.0	0	0	0	0
		2021-03-18	Fumoz	PermaNet 2.0	3min	Female	4	0	0	11	11	0	0	0	0	0			PermaNet 3.0	94.74	100	0	3.21
								0	0	40	40	0	0						Sherlock net (0.7% incorporated Sherlock)	0	0	0	0
												Mortality 24h
		2021-03-18	Fumoz	PermaNet 3.0 (top)	3min	Female	1	8	9	0	9	100	88.8889
		2021-03-18	Fumoz	PermaNet 3.0 (top)	3min	Female	2	8	9	0	9	100	88.8889
		2021-03-18	Fumoz	PermaNet 3.0 (top)	3min	Female	3	10	10	0	10	100	100
		2021-03-18	Fumoz	PermaNet 3.0 (top)	3min	Female	4	10	10	0	10	100	100	100	0	3.2075
								36	38	0	38		94.7368
												Mortality 24h
		2021-03-18	Fumoz	AM 16-8	3min	Female	1	0	0	11	11	0	0
		2021-03-18	Fumoz	AM 16-8	3min	Female	2	0	0	10	10	0	0
		2021-03-18	Fumoz	AM 16-8	3min	Female	3	0	0	10	10	0	0
		2021-03-18	Fumoz	AM 16-8	3min	Female	4	0	0	12	12	0	0	0	0	0

## Sheet: WHO cone assay_Kisumu
	WHO cone bioassays with Kisumu An. gambiae laboratory insecticide-susceptible strain
	Species	Date	Net	Sex	Expo.	Start	Stop	1H Knockdown	24H Dead	24H Alive	Total	%Mortality 24h	Average
	Kisumu	10.09.21	Control nets	F1	3 mins.			0	0	8	8	0	0
				F2				0	0	10	10	0
				F3				0	0	10	10	0
				F4				1	0	10	10	0
				F5				0	0	10	10	0
			Permanet 2.0	F1	3 mins.			ɏ	16	0	16	100	98.3333
				F2				ɏ	14	0	14	100
				F3				ɏ	16	0	16	100
				F4				ɏ	11	0	11	100
				F5				ɏ	11	1	12	91.6667
			Sherlock net	F1	3 mins.			ɏ	12	0	12	100	92.5628
				F2				ɏ	10	0	10	100
				F3				ɏ	14	1	15	93.3333
				F4				ɏ	11	3	14	78.5714
				F5				ɏ	10	1	11	90.9091
				Summarry
					Alive	Dead	%Mortality 24h	SEM
				Control net	48	0	0	0
				Permanet 2.0	1	68	98.3333	1.66667
				Sherlock net	5	57	92.5628	3.93517
	Name: By Theofelix and Sonia
	Age of Mosquitoes: 2 - 5 days old
	Conditions: 24oC, 60%RH

## Sheet: hybrid_Perm_genotyping
	Genotype and allele frequencies of the 6.5kb insertion, CYP6P9a and CYP6P9b in FUMOZ/FANG hybrids exposed to PermaNet 2.0 (DELTAMETHRIN(55 MG/M2)
	Associated statistics of significance computed with GraphPad Prism v8.0.2
		Raw data
		Alive samples					Dead samples
		ID	6.5kb SV	6p9a	6p9b		ID	6.5kb	6p9a	6p9b			Summary (6.5 kb insertion)								summary (6.5 kb insertion)								summary (6.5 kb insertion)									Summary (6.5 kb SV + CYP6P9a + CYP6P9b)
		AL_1	RR	RS	RS		DE_1	SS	SS	SS			Genotype frequency of the 6.5 kb SV								Genotype frequency of the CYP6P9a_R								Genotype frequency of the CYP6P9b_R									Dead
		AL_2	RR	RS	RS		DE_2	SS	SS	SS				RR	RS	SS	Total					RR	RS	SS	Total					RR	RS	SS	Total						RR/RR/RR	RR/RS/RR	RR/RS/RS	RS/RS/RS	RS/SS/SS	SS/SS/SS	Total
		AL_3	RR	RS	RS		DE_3	SS	SS	SS			Dead	0	2	32	34				Dead	1	1	32	34				Dead	1	0	32	33					Dead	0	1	0	0	2	30	33
		AL_4	RR	RS	RR		DE_4	SS	SS	SS			Alive	45	5	2	52				Alive	14	38	3	55				Alive	17	33	5	55					Alive	14	3	28	5	2	0	52
		AL_5	RR	RR	RR		DE_5	SS	SS	SS				45	7	34						15	39	35						18	33	37						total	14	4	28	5	4	30
		AL_6		SS	SS		DE_6	SS	SS	SS			%Genotype frequency of the 6.5 kb SV								%Genotype frequency of the CYP6P9a_R								%Genotype frequency of the CYP6P9b_R									%Genotype frequency (6.5 kb SV + CYP6P9a + CYP6P9b)
		AL_7	RR	RS	RS		DE_7	SS	SS	SS				RR	RS	SS	Total					RR	RS	SS						RR	RS	SS							RR/RR/RR	RR/RS/RR	RR/RS/RS	RS/RS/RS	RS/SS/SS	SS/SS/SS
		AL_8	RR	RS	RS		DE_8	SS	SS	SS			Dead	0	28.5714	94.1176					Dead	6.66667	2.5641	91.4286					Dead	5.55556	0	86.4865						Dead	0	25	0	0	50	100
		AL_9	RR	RS	RS		DE_9	SS	SS	SS			Alive	100	71.4286	5.88235					Alive	93.3333	97.4359	8.57143					Alive	94.4444	100	13.5135						Alive	100	75	100	100	50	0
		AL_10	RR	RR	RR		DE_10	SS	SS	SS				100	100	100
		AL_11	RR	RS	RS		DE_11	SS	SS
		AL_12	RR	RS	RS		DE_12	SS	SS	SS
		AL_13	RR	RR	RR		DE_13	SS	SS	SS
		AL_14	RR	RR	RR		DE_14	SS	SS	SS
		AL_15	RR	RR	RR		DE_15	SS	SS	SS
		AL_16	RR	RS	RS		DE_16	SS	SS	SS
		AL_17	RR	RS	RS		DE_17	SS	SS	SS
		AL_18	RR	RR	RR		DE_18	SS	RS	SS
		AL_19	RR	RS	RS		DE_19	SS	SS	SS
		AL_20	RR	RS	RS		DE_20	RS	SS	SS
		AL_21	RS	RS	RS		DE_21	SS	SS	SS
		AL_22	RR	RS	RS		DE_22	SS	SS	SS
		AL_23	RR	RR	RR		DE_23	SS	SS	SS
		AL_24		SS	SS		DE_24	SS	SS	SS
		AL_25	RR	RR	RR		DE_25	SS	SS	SS			6.5kb SV %Allelic frequency								CYP6P9a % Allelic frequency								CYP6P9b % Allelic frequency
		AL_26	SS	RS	SS		DE_26	SS	SS	SS				R	S							R	S							R	S
		AL_27	RR	RS	RS		DE_27	SS	SS	SS			Dead	2.94118	97.0588						Dead	4.41176	95.5882						Dead	3.0303	96.9697									Computed statistics (6.5 kb SV + CYP6P9a + CYP6P9b)
		AL_28	RR	RS	RS		DE_28	SS	SS	SS			Alive	91.3462	8.65385						Alive	60	40						Alive	60.9091	39.0909									STATS	ODDS RATIO	CI	p value (Fisher's exact test)
		AL_29	RR	RS	RS		DE_29	SS	SS	SS																														RR/RR/RR vs SS/SS/SS	Infinity	1980 to Infinity	<0.0001
		AL_30	RR	RS	RS		DE_30	SS	SS	SS																														RR/RR/RR vs RS/SS/SS	Infinity	28.91 to Infinity	<0.0001
		AL_31	RR	RR	RR		DE_31	RS	RR	RR																														RR/RR/RR vs RS/RS/RS			>0.9999
		AL_32	RR	RS	RS		DE_32	SS	SS	SS																														RR/RR/RR vs RR/RS/RS			>0.9999
		AL_33	RS	RS	RS		DE_33	SS	SS	SS																														RR/RR/RR vs RR/RS/RR	Infinity	9.31 to Infinity	<0.0001
		AL_34	RS	RS	RS		DE_34	SS	SS	SS																														RR/RS/RR vs SS/SS/SS	Infinity	82.96 to Infinity	<0.0001
		AL_35	RS	RS	RS																																			RR/RS/RR vs RS/SS/SS	3	1.67 to 5.39	0.0004
		AL_36	RR	RR	RR																																			RR/RS/RR vs RS/RS/RS	0	0 to 0.11	<0.0001
		AL_37	RR	RS	RR																																			RR/RS/RR vs RR/RS/RS	0	0 to 0.11	<0.0001
		AL_38	RR	RS	RR																																			RR/RS/RS vs Ss/Ss/SS	Infinity	1980 to Infinity	<0.0001
		AL_39	RR	RS	RS																																			RR/RS/RS vs RS/SS/SS	Infinity	28.91 to Infinity	<0.0001
		AL_40	RR	RS	RS																																			RR/RS/RS vs RS/RS/RS			>0.9999
		AL_41	RR	RS	RS								Computed statistics (6.5 kb SV)								Computed statistics (CYP6P9a_R)								Computed statistics (CYP6P9b_R)											RS/RS/RS vs SS/SS/SS	Infinity	1980 to Infinity	<0.0001
		AL_42	RR	RS	RS									ODDS RATIO	CI (95%)	p value (Fisher's exact test)						ODDS RATIO	CI (95%)	p value (Fisher's exact test)						OR	CI (95%)	p value (Fisher's exact test)								RS/RS/RS vs RS/SS/SS	Infinity	28.91 to Infinity	<0.0001
		AL_43	RR	RS	RS								RR vs RS	Inf	11.56-Inf.	<0.0001					RR vs RS	0.4	0.1-1.6	0.3311					RR vs RS	0	0-0.7	0.0289								RS/Ss/SS vs Ss/SS/SS	Infinity	28.91 to Infinity	<0.0001
		AL_44		SS	SS								RR vs SS	Inf	318.8-Inf.	<0.0001					RR vs SS	134.3	48.01-351.4	<0.0001					RR vs SS	96.2	33.96-256.2	<0.0001
		AL_45	RR	RR	RR								RS vs SS	38.36	15.5-91.7	<0.0001					RS vs SS	326.9	86.3-1059	<0.0001					RS vs SS	Inf.	156.1-Inf.	<0.0001
		AL_46	RR	RS	RS								R vs S	326.9	86.25 to 1059	<0.0001					R vs S	36	12.35 to 96.02	<0.0001					R vs S	50.57	15.96 to 158.5	<0.0001
		AL_47	RR	RR	RR
		AL_48	RS	RS	RS								P value and statistical significance								P value and statistical significance								P value and statistical significance
		AL_49	RR	RR	RR								Test	Chi-square							Test	Chi-square							Test	Chi-square
		AL_50	RR	RS	RS								Chi-square, df	191.6, 2							Chi-square, df	221.1, 2							Chi-square, df	216.8, 2
		AL_51	RR	RS	RS								P value	<0.0001							P value	<0.0001							P value	<0.0001
		AL_52	SS	RS	SS								P value summary	****							P value summary	****							P value summary	****
		AL_53	RR	RS	RS								One- or two-sided	NA							One- or two-sided	NA							One- or two-sided	NA
		AL_54	RR	RS	RS								Statistically significant (P < 0.05)?	Yes							Statistically significant (P < 0.05)?	Yes							Statistically significant (P < 0.05)?	Yes
		AL_55	RR	RR	RR

## Sheet: hybrid_sher_genotyping
	Genotype and allele frequencies of the 6.5kb insertion, CYP6P9a and CYP6P9b in FUMOZ/FANG hybrids exposed to Sherlock bed net (0.7% incorporated shelock net)
	Associated statistics of significance computed with GraphPad Prism v8.0.2
	Raw Data
	Alive samples					Dead samples
	ID	6.5kb SV	6p9a	6p9b		ID	6.5kb	6p9a	6p9b
	AL_1	RS		RS		DE_1	RS	RS	RS			Summary (6.5 kb SV)							Summary (CYP6P9a_R)							Summary (CYP6Pb_R)							Summary (6.5 kb SV + CYP6P9a + CYP6P9b)
	AL_2	RR	RS	RR		DE_2	SS	SS	SS			Genoptype frequency of the 6.5 kb SV							Genotype frequency of the CYP6P9a_R							Genotype frequency of the CYP6P9b_R							Genotype frequency (6.5kb SV + CYP6P9a + CYP6P9b)
	AL_3	SS	RS	SS		DE_3	SS	SS	SS				RR	RS	SS	Total				RR	RS	SS	Total				RR	RS	SS	Total				RR/RR/RR	RR/RR/RS	RR/RS/RS	RS/RS/RR	RS/RS/RS	SS/RS/SS	SS/SS/SS	Total
	AL_4	SS	SS	SS		DE_4	SS	SS	SS			Dead	3	13	37	53			Dead	2	15	37	54			Dead	1	18	38	57			Dead	0	2	1	0	10	2	30	45
	AL_5	RR	RR	RR		DE_5	RS	RS	RS			Alive	40	10	8	58			Alive	12	36	9	57			Alive	24	27	11	62			Alive	11	10	18	4	4	1	5	53
	AL_6	RS		RS		DE_6	SS	SS	SS				43	23	45	111				14	51	46	111				25	45	49	119				11	12	19	4	14	3	35
	AL_7	RS	RS	RS		DE_7	SS	SS	SS			%Genotype frequency of the 6.5kb SV							%Genotype frequency of the CYP6P9a_R							%Genotype frequency of the CYP6P9a_R							%Genotype frequency (6.5kb SV + CYP6P9a + CYP6P9b)
	AL_8	RR	RS	RS		DE_8	SS	SS	SS				RR	RS	SS					RR	RS	SS					RR	RS	SS					RR/RR/RR	RR/RR/RS	RR/RS/RS	RS/RS/RR	RS/RS/RS	SS/RS/SS	SS/SS/SS
	AL_9	RR	RS	RS		DE_9	SS	SS	SS			Dead	6.97674	56.5217	82.2222				Dead	14.2857	29.4118	80.4348				Dead	4	40	77.551				Dead	0	16.6667	5.26316	0	71.4286	66.6667	85.7143
	AL_10	SS	SS	SS		DE_10	RS	RS	RS			Alive	93.0233	43.4783	17.7778				Alive	85.7143	70.5882	19.5652				Alive	96	60	22.449				Alive	100	83.3333	94.7368	100	28.5714	33.3333	14.2857
	AL_11	RS	RS	RS		DE_11	SS	SS	SS				100	100	100					100	100	100					100	100	100
	AL_12		SS	SS		DE_12	SS	SS	SS																								Genotype frequency (6.5 kb SV + CYP6P9a + CYP6P9b)									%Genotype frequency (6.5 kb SV + CYP6P9a + CYP6P9b)
	AL_13	RR	RS	RS		DE_13	SS	SS	SS																									RR/RR/RR	RR/RR/RS	RR/RS/RS	RS/RS/RS	SS/RS/SS	SS/SS/SS				RR/RR/RR	RR/RR/RS	RR/RS/RS	RS/RS/RS	SS/RS/SS	SS/SS/SS
	AL_14	RS	RS	RS		DE_14	SS	SS	SS																								Dead	0	2	1	10	2	30	45		Dead	0	16.6667	4	71.4286	66.6667	85.7143
	AL_15	RS	RS	RS		DE_15	SS	SS	SS																								Alive	11	10	24	4	1	5	55		Alive	100	83.3333	96	28.5714	33.3333	14.2857
	AL_16	RR	RS	RS		DE_16	RS	RS	RS																									11	12	25	14	3	35	100
	AL_17			SS		DE_17			RS
	AL_18	RR	RS	RS		DE_18	RS	RS	RS
	AL_19	RR	RS	RS		DE_19	RS	RS	RS
	AL_20	RR	RR	RR		DE_20	RR	RR	RS
	AL_21	SS	SS	RS		DE_21	RR	RS	RR
	AL_22	RR	RS	RS		DE_22	SS	SS	RS
	AL_23		SS	SS		DE_23	RS	RS	SS
	AL_24	SS	SS	SS		DE_24			RS
	AL_25	RR		RS		DE_25	RS	RS	RS			6.5kb SV %Allelic frequency							6p9a %Allelic frequency							6p9b %Allelic frequency
	AL_26	RR	RS	RS		DE_26	SS	RS	SS				R	S						R	S						R	S
	AL_27	RR	RR	RR		DE_27	SS	RS	SS			Dead	17.9245	82.0755					Dead	17.5926	82.4074					Dead	17.5439	82.4561
	AL_28	RR	RS	RS		DE_28	SS	RR	SS			Alive	77.5862	22.4138					Alive	52.6316	47.3684					Alive	60.4839	39.5161
	AL_29	RR	RR	RR		DE_29	RR	RS	RS
	AL_30	RR	RS	RR		DE_30	RS	SS	RS																																	Computed Statistics (6.5kb SV + CYP6P9a + CYP6P9b)
	AL_31	RR	RR	RR		DE_31	RS	RS	RS																																	Stats	ODDS RATIO	CI	p value (Fisher's exact test)
	AL_32	SS	SS	SS		DE_32	RS	RS	RS																																	RR/RR/RR vs SS/SS/SS	Infinity	156.1 to Infinity	<0.0001
	AL_33	RR	RR	RR		DE_33	RS	SS	RS																																	RR/RR/RR vs SS/RS/SS	Infinity	57.58 to Infinity	<0.0001
	AL_34	RS	RS	RR		DE_34	SS	SS	SS																																	RR/RR/RR vs RS/RS/RS	Infinity	68.71 to Infinity	<0.0001
	AL_35	RR	RS	RS		DE_35		SS	SS																																	RR/RR/RR vs RR/RR/RS	Infinity	5.42 to Infinity	<0.0001
	AL_36	RR	RS	RS		DE_36	SS	SS	SS																																	RR/RR/RS vs SS/SS/SS	29.99	14.02 to 65.09	<0.0001
	AL_37	RR	RR	RR		DE_37	SS	SS	SS																																	RR/RR/RS vs SS/RS/SS	9.91	4.96 to 18.59	<0.0001
	AL_38	RR	RS	RR		DE_38	SS	SS	SS																																	RR/RR/RS vs RS/RS/RS	11.95	6.17 to 22.86	<0.0001
	AL_39	RR	RS	RR		DE_39	SS	SS	SS																																	RR/RR/RS vs RR/RS/RS	0.2034	0.07 to 0.58	0.0046
	AL_40	RR	RS	RS		DE_40	RS	RS	RS																																	RR/RS/RS vs SS/SS/SS	147.4	46.52 to 402.5	<0.0001
	AL_41	RR	RS	RS		DE_41	SS	SS	SS			Computed statistics (6.5kb SV)							Computed statistics (CYP6P9a_R)							Computed statistics (CYP6P9b_R)																RR/RS/RS vs SS/RS/SS	48.73	16.46 to 130.1	<0.0001
	AL_42	RR	RS	RS		DE_42	SS	SS	SS				ODDS RATIO	CI (95%)	p value (Fisher's exact test)					ODDS RATIO	CI (95%)	p value (Fisher's exact test)					ODDS RATIO	CI (95%)	p value (Fisher's exact test)													RR/RS/RS vs RS/RS/RS	58.76	19.56 to 157.1	<0.0001
	AL_43	RR	RR	RS		DE_43	-	SS	SS			RR vs RS	16.9	5.8 to 47.3	<0.0001				RR vs RS	2.3	0.8 to 6.7	0.2067				RR vs RS	14.18	3.4 to 62.3	<0.0001													RS/RS/RS vs SS/SS/SS	2.509	1.27 to 5.24	0.0153
	AL_44	RS	RS	RR		DE_44	SS	SS	SS			RR vs SS	57.5	21.3 to 156.4	<0.0001				RR vs SS	22.6	6.8 to 65.2	<0.0001				RR vs SS	72.6	16.6 to 315	<0.0001													RS/RS/RS vs SS/RS/SS	0.8293	0.45 to 1.53	0.6467
	AL_45	RS	RS	RR		DE_45		SS	SS			RS vs SS	3.4	1.5 to 8.1	0.0046				RS vs SS	9.7	4.8 to 19.6	<0.0001				RS vs SS	5.1	2.5 to 9.9	<0.0001													SS/RS/SS vs SS/SS/SS	3.026	1.48 to 6.22	0.0025
	AL_46	RR	RR	RR		DE_46	SS	SS	SS			R vs S	16.15	8.066 to 32.07	<0.0001				R vs S	5.137	2.671 to 9.819	<0.0001				R vs S	7.125	3.676 to 13.80	<0.0001
	AL_47	RR	RS	RS		DE_47	SS		SS				P value and statistical significance							P value and statistical significance						P value and statistical significance
	AL_48	RR	RS	RS		DE_48	SS	SS	SS				Test	Chi-square						Test	Chi-square					Test	Chi-square
	AL_49	RR	RS	RS		DE_49	SS	SS	SS				Chi-square, df	116.7, 2						Chi-square, df	98.97, 2					Chi-square, df	113.5, 2
	AL_50		SS	SS		DE_50	SS	SS	SS				P value	<0.0001						P value	<0.0001					P value	<0.0001
	AL_51	RR	RR	RR		DE_51	SS	SS	SS				P value summary	****						P value summary	****					P value summary	****
	AL_52	RR	RS	RR		DE_52	SS	SS	RS				One- or two-sided	NA						One- or two-sided	NA					One- or two-sided	NA
	AL_53	RR	RS	RR		DE_53	SS						Statistically significant (P < 0.05)?	Yes						Statistically significant (P < 0.05)?	Yes					Statistically significant (P < 0.05)?	Yes
	AL_54	RR	RS	RR		DE_54	SS	SS	SS
	AL_55	RR	RS	RR		DE_55	SS	SS	SS
	AL_56	SS	SS	SS		DE_56	SS	SS	SS
	AL_57	RR	RR	RR		DE_57	SS	SS	SS
	AL_58	RR	RR	RR		DE_58	SS	SS	SS
	AL_59	RR	RS	RR
	AL_60	RR	RS	RS
	AL_61	SS		SS
	AL_62	RS	RS	RR

## Sheet: Field_Perm_GSTe2_genotyping
	Genotype and allele frequencies of the L119F_GSTe2 in An. funestus (Mibellon) F1 exposed to PermaNet 2.0
	Associated statistics of significance computed with GraphPad Prism v8.0.2
	Raw data
	Alive				Dead
	ID	Genotype			ID	Genotype				Summary (L119F_GSTe2)
	AL_1	RS			DE_1	SS				Genotype frequency
	AL_2	RR			DE_2	RS					RR	RS	SS	Total		%%	RR	RS	SS
	AL_3	RS			DE_3	SS				Dead	0	6	13	19		Dead	0	28.5714	33.3333
	AL_4	SS			DE_4	SS				Alive	3	15	26	44		Alive	100	71.4286	66.6667
	AL_5	SS			DE_5	SS				Total	3	21	39
	AL_6	RS			DE_6	SS				%Genotype frequency
	AL_7	SS			DE_7	SS				%	RR	RS	SS	total
	AL_8	SS			DE_8					Dead	0	31.5789	68.4211	100
	AL_9	SS			DE_9	RS				Alive	6.81818	34.0909	59.0909	100
	AL_10	SS			DE_10	RS
	AL_11	SS			DE_11	SS
	AL_12	RR			DE_12	SS
	AL_13	RS			DE_13	RS
	AL_14	SS			DE_14	SS
	AL_15	SS			DE_15	SS
	AL_16	SS			DE_16	RS
	AL_17	SS			DE_17	SS
	AL_18	SS			DE_18	RS
	AL_19	RS			DE_19	SS
	AL_20	RS			DE_20	SS
	AL_21	RR
	AL_22	RS
	AL_23	SS
	AL_24	SS
	AL_25	RS								%Allele frequency
	AL_26	RS									R	S	Total
	AL_27	SS								Dead	15.7895	84.2105	100
	AL_28	SS								Alive	23.8636	76.1364	100
	AL_29	SS
	AL_30	RS
	AL_31	SS
	AL_32	SS
	AL_33	SS
	AL_34	RS
	AL_35	SS
	AL_36	SS
	AL_37	RS
	AL_38	SS
	AL_39	SS
	AL_40	RS
	AL_41	RS
	AL_42	RS
	AL_43	SS
	AL_44	SS
										Computed statistics
											ODDS RATIO	CI	p value (Fisher's exact test)
										RR vs SS	Infinity	1.957 to Infinity	0.0059	**
										RR vs RS	Infinity	1.490 to Infinity	0.0159	*
										RS vs SS	1.225	0.6713 to 2.249	0.5454	ns
										R vs S	1.658	0.8289 to 3.304	0.2156	ns

## Sheet: Field_Sher_GSTe2_genotyping
	Genotype and allele frequencies of the L119F_GSTe2 in An. funestus (Mibellon) F1 exposed to 0.7% incorporated Sherlock net
	Associated statistics of significance computed with GraphPad Prism v8.0.2
	Raw data
	Alive				Dead
	ID	Genotype			ID	Genotype				Summary (L119F_GSTe2)
	AL_1	SS			DE_1	RS				Genotype frequency
	AL_2	RS			DE_2	RS					RR	RS	SS	Total
	AL_3	SS			DE_3	RS				Dead	0	10	4	14
	AL_4	SS			DE_4	RS				Alive	3	21	21	45
	AL_5	SS			DE_5	RS				Total	3	31	25
	AL_6	RS			DE_6	RS				%Genotype Frequency
	AL_7	RS			DE_7	RS				%	RR	RS	SS	total
	AL_8	RS			DE_8	RS				Dead	0	32.2581	16	48.2581
	AL_9	SS			DE_9	SS				Alive	100	67.7419	84	251.742
	AL_10	RS			DE_10	SS
	AL_11	RS			DE_11	SS
	AL_12	SS			DE_12	SS
	AL_13	SS			DE_13	RS
	AL_14	RS			DE_14	RS
	AL_15	SS
	AL_16	SS
	AL_17	SS
	AL_18	RR
	AL_19	SS
	AL_20	RS
	AL_21	SS
	AL_22	SS
	AL_23	SS
	AL_24	SS
	AL_25	RS								%Allele frequency
	AL_26	RS									R	S	total
	AL_27	RS								Dead	35.7143	64.2857	100
	AL_28	RS								Alive	30	70	100
	AL_29	RS
	AL_30	SS
	AL_31	RS
	AL_32	RS
	AL_33	SS
	AL_34	RS
	AL_35	RS
	AL_36	SS
	AL_37	RS
	AL_38	RR
	AL_39	RS
	AL_40	SS
	AL_41	RS								Computed statistics
	AL_42	SS									ODDS RATIO	CI	p value (Fisher's exact test)
	AL_43	RR								RR vs SS	Infinity	0.9918 to Infinity	0.0901	ns
	AL_44	SS								RR vs RS	Infinity	2.537 to Infinity	0.0022	**
	AL_45	RS								RS vs SS	0.4085	0.2319 to 0.7280	0.0033	**
										R vs S	0.7619	0.4164 to 1.372	0.4522	ns

## Sheet: QRT-PCR analysis_field strains
	QPCR analysis of the level of gene expression in An. funestus (Mibellon) F1 computed using the 2-∆∆CT
	1) Input raw Ct values from the real-time PCR machine
	RAW Ct (SAMPLES)	actin	SP7	CYP6P9a	CYP6P9b	CYP9K1	CYP325A	GSTe2	Carboxylesterase E2		2) Input PCR Efficiencies from Standard Curves
	Control Net_1	35.47	35.54	27.44	32.18	28.55	No Ct	28.36	No Ct		6P5	0.909		CYP6P9a	0.998	9K1	0.91																5) Calculate the Delta Ct value (Ct Target - Ct Control)									6a) Computing the 2^-(SP7)
	Control Net_1	32.25	31.08	27.31	30.97	28.22	35.09	28.06	36.05		SP7	1		GSTe2	1.107							4) Average the technical replicates											dCt SP7									BIOLOGICAL REPLICATES	CYP6P9a	CYP6P9b	CYP9K1	CYP325A	GSTe2	Carboxylesterase E2
	Control Net_1	30.25	28.5	27.22	29.87	27.97	34.16	28.64	35.11		CYP6P9b	1.005		325A	1.09							BIOLOGICAL REPLICATES	Actin	SP7	CYP6P9a	CYP6P9b	CYP9K1	CYP325A	GSTe2	Carboxylesterase E2			BIOLOGICAL REPLICATES	CYP6P9a	CYP6P9b	CYP9K1	CYP325A	GSTe2	Carboxylesterase E2			Control Net_1	5.68085	0.598914	9.78479	0.00763165	0.617611	0.0177547
	Control Net_2	35.85	No Ct	27.45	32.97	28.03	36.57	27.88	No Ct		Actin	0.906		Carb.E2	1.001							Control Net_1	28.1491	29.79	27.2839	30.5296	26.4995	36.8238	30.4852	35.6057			Control Net_1	-2.50611	0.73958	-3.29054	7.03379	0.695229	5.81566			Control Net_2	10.1787	0.993592	22.4143	0.0371371	1.45511	0.0132632
	Control Net_2	31.49	32.43	27.05	31.07	27.56	33.76	28.17	38.25													Control Net_2	28.1723	30.435	27.0875	30.4443	25.9487	35.186	29.8939	36.6714			Control Net_2	-3.34749	0.00927385	-4.48635	4.75099	-0.541125	6.23643			Control Net_3	4.13776	0.742074	10.3277	0.0119794	0.425111	0.00383481
	Control Net_2	29.06	28.44	26.88	29.6	27.06	32.41	27.36	35.04		3) Calculate Ct values according to PCR efficiency correction; CtE = Ct*((log(E+1)/(log(2))											Control Net_3	28.3538	28.925	26.8762	29.3554	25.5566	35.3083	30.1591	36.9516			Control Net_3	-2.04885	0.430365	-3.36845	6.3833	1.23409	8.02663			Perm. 2.0_1	1.50883	0.40012	4.53188	0.00311948	0.124082	0.023585
	Control Net_3	No Ct	35.62	27.06	31.01	27.67	36.53	28.19	No Ct		RAW Ct (SAMPLES)	actin	SP7	CYP6P9a	CYP6P9b	CYP9K1	CYP325A	GSTe2	Carboxylesterase E2			Perm. 2.0_1	25.6397	26.0267	25.4332	27.3482	23.8466	34.3511	29.0373	31.4327			Perm. 2.0_1	-0.59343	1.32149	-2.18011	8.32448	3.01064	5.40599			Perm. 2.0_2	1.42279	0.354365	4.30492	0.00427446	0.116403	0.029908
	Control Net_3	34.53	30.24	26.77	29.63	27.08	33.79	28.13	38.09		Control Net_1	33.0065	35.54	27.4004	32.2959	26.6535	#VALUE!	30.4924	#VALUE!			Perm. 2.0_2	26.6013	27.3	26.7913	28.7967	25.194	35.17	30.4028	32.3633			Perm. 2.0_2	-0.508727	1.49669	-2.10599	7.87004	3.1028	5.06332			Perm. 2.0_3	2.91605	0.591449	5.37336	0.0319415	0.186271	0.0543053
	Control Net_3	30.47	27.61	26.35	28.87	26.51	32.61	27.83	35.76		Control Net_1	30.0102	31.08	27.2706	31.0816	26.3454	37.3183	30.1698	36.076			Perm. 2.0_3	26.8587	27.3833	25.8393	28.141	24.9575	32.3518	29.8079	31.5861			Perm. 2.0_3	-1.54402	0.757673	-2.42582	4.96843	2.42453	4.20276			Sherlock net_1	3.97604	0.686125	4.23053	0.00238437	0.264527	0.0105366
	Perm. 2.0_1	27.89	26.35	25.57	27.21	25.52	32.82	27.16	31.69		Control Net_1	28.1491	28.5	27.1807	29.9776	26.112	36.3293	30.7935	35.1353			Sherlock net_1	27.752	28.28	26.2887	28.8235	26.1992	36.9922	30.1985	34.8484			Sherlock net_1	-1.99133	0.543456	-2.08084	8.71218	1.91851	6.56845			Sherlock net_2	5.72511	1.04994	2.06794	0.0105933	0.976419	0.0194219
	Perm. 2.0_1	27.5	25.93	25.49	27.36	25.51	32.37	27.09	31.41		Control Net_2	33.3602	#VALUE!	27.4104	33.0888	26.168	38.8923	29.9763	#VALUE!			Sherlock net_2	29.8489	30.63	28.1127	30.5597	29.5818	37.1907	30.6644	36.3162			Sherlock net_2	-2.5173	-0.0703119	-1.0482	6.5607	0.0344278	5.68617			Sherlock net_3	4.01806	0.719725	2.48531	0.000644356	0.517429	#VALUE!
	Perm. 2.0_1	27.27	25.8	25.35	27.18	25.6	31.71	26.77	31.13		Control Net_2	29.303	32.43	27.011	31.1819	25.7293	35.9039	30.2881	38.2776			Sherlock net_3	29.1975	29.5633	27.5568	30.0378	28.2499	40.1632	30.5139	#VALUE!			Sherlock net_3	-2.0065	0.474482	-1.31343	10.5999	0.950568	#VALUE!			Fang_1	0.280428	0.0681922	0.314885	0.000335332	0.0452534	0.00641921
	Perm. 2.0_2	28.91	27.42	26.83	28.92	27.11	33.04	28.16	32.27		Control Net_2	27.0417	28.44	26.8412	29.7066	25.2625	34.4681	29.4172	35.0653			Fang_1	24.6688	25.17	27.0043	29.0442	26.8371	36.7121	29.6358	32.4534			Fang_1	1.8343	3.87425	1.6671	11.5421	4.46583	7.28339			Fang_2	3.31025	1.55759	0.315479	0.00019266	0.0797438	0.00327578
	Perm. 2.0_2	28.54	27.26	26.86	28.49	26.87	33.34	28.24	32.5		Control Net_3	#VALUE!	35.62	27.0209	31.1217	25.832	38.8498	30.3096	#VALUE!			Fang_2	24.6719	24.9767	23.2497	24.3374	26.6411	37.3183	28.6252	33.2306			Fang_2	-1.72694	-0.639312	1.66438	12.3417	3.64848	8.25395			Fang_3	0.236825	0.642942	0.17167	0.000202269	0.0376569	0.0025465
	Perm. 2.0_2	28.31	27.22	26.8	28.67	26.98	32.83	28.43	32.25		Control Net_3	32.1318	30.24	26.7314	29.7367	25.2811	35.9358	30.2451	38.1175			Fang_3	24.7092	24.5967	26.6748	25.2339	27.139	36.8681	29.3276	33.2139			Fang_3	2.07811	0.637239	2.54229	12.2714	4.73094	8.61727
	Perm. 2.0_3	29.56	27.66	25.89	28.35	26.7	30.56	27.77	31.64		Control Net_3	28.3538	27.61	26.312	28.974	24.749	34.6808	29.9225	35.7858
	Perm. 2.0_3	28.52	27.36	25.89	28	26.8	30.32	27.71	31.89		Perm. 2.0_1	25.953	26.35	25.5331	27.308	23.8248	34.9042	29.2022	31.7129
	Perm. 2.0_3	28.51	27.13	25.85	27.77	26.7	30.38	27.69	31.16		Perm. 2.0_1	25.5901	25.93	25.4532	27.4586	23.8154	34.4256	29.1269	31.4327														dCt ACTIN									6b) Computing the 2^-(actin)
	Sherlock net_1	29.98	28.25	26.23	28.37	28.18	34.81	28.2	34.87		Perm. 2.0_1	25.376	25.8	25.3134	27.2779	23.8995	33.7237	28.7828	31.1524														BIOLOGICAL REPLICATES	CYP6P9a	CYP6P9b	CYP9K1	CYP325A	GSTe2	Carboxylesterase E2			BIOLOGICAL REPLICATES	CYP6P9a	CYP6P9b	CYP9K1	CYP325A	GSTe2	Carboxylesterase E2
	Sherlock net_1	29.81	28.24	26.26	29.15	28	35.07	27.87	34.27		Perm. 2.0_2	26.9021	27.42	26.7913	29.0242	25.3092	35.1381	30.2774	32.2933														Control Net_1	-0.865186	2.3805	-1.64962	8.67471	2.33615	7.45658			Control Net_1	1.82157	0.192043	3.13751	0.0024471	0.198038	0.00569307
	Sherlock net_1	29.68	28.35	26.49	28.64	28.01	34.47	28.19	35.33		Perm. 2.0_2	26.5578	27.26	26.8212	28.5926	25.0851	35.4572	30.3634	32.5234														Control Net_2	-1.08483	2.27193	-2.22369	7.01365	1.72153	8.49908			Control Net_2	2.12113	0.207053	4.67087	0.00773893	0.303227	0.00276389
	Sherlock net_2	32.44	30.82	28.2	30.68	31.79	35.22	28.67	36.66		Perm. 2.0_2	26.3438	27.22	26.7613	28.7733	25.1878	34.9148	30.5677	32.2733														Control Net_3	-1.47765	1.00156	-2.79725	6.9545	1.80529	8.59783			Control Net_3	2.78495	0.499458	6.95114	0.00806284	0.286124	0.00258105
	Sherlock net_2	31.92	30.69	27.87	30.2	31.73	No Ct	28.31	36.92		Perm. 2.0_3	27.507	27.66	25.8526	28.4521	24.9264	32.5006	29.858	31.6628														Perm. 2.0_1	-0.206466	1.70846	-1.79315	8.71144	3.3976	5.79295			Perm. 2.0_1	1.15386	0.305987	3.4657	0.00238558	0.0948898	0.0180363
	Sherlock net_2	31.87	30.38	28.39	30.47	31.54	34.72	28.58	35.29		Perm. 2.0_3	26.5392	27.36	25.8526	28.1009	25.0197	32.2454	29.7935	31.913														Perm. 2.0_2	0.190004	2.19542	-1.40726	8.56877	3.80153	5.76205			Perm. 2.0_2	0.876603	0.218329	2.65232	0.00263355	0.0717176	0.0184268
	Sherlock net_3	31.62	29.84	27.96	29.88	30.13	38.59	28.49	No Ct		Perm. 2.0_3	26.5299	27.13	25.8127	27.87	24.9264	32.3092	29.772	31.1825														Perm. 2.0_3	-1.0194	1.28229	-1.90121	5.49304	2.94914	4.72738			Perm. 2.0_3	2.02708	0.411143	3.73527	0.022204	0.129485	0.0377501
	Sherlock net_3	31.3	29.62	27.21	29.7	30.15	36.94	28.27	No Ct		Sherlock net_1	27.8978	28.25	26.1921	28.4722	26.3081	37.0205	30.3204	34.8951														Sherlock net_1	-1.46338	1.07141	-1.55289	9.24013	2.44647	7.0964			Sherlock net_1	2.75754	0.475854	2.93404	0.00165365	0.18346	0.00730753
	Sherlock net_3	31.21	29.23	27.62	30.21	30.5	33.94	28.38	No Ct		Sherlock net_1	27.7396	28.24	26.2221	29.255	26.14	37.297	29.9656	34.2947														Sherlock net_2	-1.73619	0.710806	-0.267077	7.34182	0.815546	6.46729			Sherlock net_2	3.33153	0.610979	1.20337	0.00616443	0.568193	0.0113019
	Fang_1	26.25	25.15	26.92	28.82	28.89	36.35	27.63	32.63		Sherlock net_1	27.6187	28.35	26.4518	28.7432	26.1494	36.6589	30.3096	35.3555														Sherlock net_3	-1.64066	0.840317	-0.94759	10.9657	1.3164	#VALUE!			Sherlock net_3	3.1181	0.558521	1.92865	0.000500033	0.401535	#VALUE!
	Fang_1	26.93	25.12	27.06	29.06	28.59	34.47	27.64	32.34		Sherlock net_2	30.187	30.82	28.1593	30.7905	29.6783	37.4566	30.8257	36.6864														Fang_1	2.33547	4.37542	2.16827	12.0433	4.967	7.78456			Fang_1	0.198132	0.0481801	0.222477	0.000236924	0.0319731	0.00453539
	Fang_1	26.35	25.24	27.15	25.48	28.76	34.57	27.42	32.32		Sherlock net_2	29.7031	30.69	27.8298	30.3088	29.6223	#VALUE!	30.4386	36.9466														Fang_2	-1.42221	-0.334578	1.96912	12.6464	3.95322	8.55868			Fang_2	2.67995	1.26101	0.255409	0.000155976	0.0645599	0.00265204
	Fang_2	26.27	24.82	23.13	24.37	28.44	38.45	26.44	32.77		Sherlock net_2	29.6566	30.38	28.349	30.5798	29.4449	36.9248	30.7289	35.3154														Fang_3	1.96562	0.524751	2.4298	12.1589	4.61845	8.50478			Fang_3	0.256029	0.695079	0.185591	0.000218671	0.0407106	0.002753
	Fang_2	26.66	24.96	23.42	24.25	28.59	34.92	26.67	33.71		Sherlock net_3	29.4239	29.84	27.9196	29.9876	28.1285	41.0406	30.6322	#VALUE!
	Fang_2	26.61	25.15	23.3	24.13	28.58	35.26	26.76	33.14		Sherlock net_3	29.1262	29.62	27.1707	29.807	28.1472	39.2858	30.3956	#VALUE!
	Fang_3	26.52	24.49	26.74	25.1	28.84	35.25	27.32	33.16		Sherlock net_3	29.0424	29.23	27.5801	30.3188	28.474	36.0953	30.5139	#VALUE!
	Fang_3	26.16	24.64	26.62	25.05	28.83	34.62	27.75	32.97		Fang_1	24.4269	25.15	26.8811	28.9238	26.9709	38.6583	29.7075	32.6535																							7c) Computing the AVG.(SP7+ ACTIN)/2)
	Fang_3	26.98	24.66	26.78	25.28	29.54	34.13	26.76	33.44		Fang_1	25.0597	25.12	27.0209	29.1647	26.6908	36.6589	29.7183	32.3633																							BIOLOGICAL REPLICATES	CYP6P9a	CYP6P9b	CYP9K1	CYP325A	GSTe2	Carboxylesterase E2
	Negative	No Ct	36.31	27.82	31.89	No Ct	36.22	28.07	No Ct		Fang_1	24.5199	25.24	27.1108	25.5718	26.8495	36.7653	29.4817	32.3433																							Control Net_1	3.75121	0.395478	6.46115	0.00503938	0.407825	0.0117239
											Fang_2	24.4455	24.82	23.0966	24.4578	26.5508	40.8917	28.428	32.7936																							Control Net_2	6.14994	0.600323	13.5426	0.022438	0.879167	0.00801355
											Fang_2	24.8084	24.96	23.3862	24.3374	26.6908	37.1375	28.6753	33.7343																							Control Net_3	3.46135	0.620766	8.63943	0.0100211	0.355618	0.00320793
											Fang_2	24.7619	25.15	23.2664	24.2169	26.6815	37.4991	28.7721	33.1639																							Perm. 2.0_1	1.33134	0.353054	3.99879	0.00275253	0.109486	0.0208107
											Fang_3	24.6781	24.49	26.7014	25.1904	26.9242	37.4885	29.3742	33.1839																							Perm. 2.0_2	1.1497	0.286347	3.47862	0.00345401	0.0940604	0.0241674
											Fang_3	24.3431	24.64	26.5816	25.1402	26.9149	36.8185	29.8365	32.9938																							Perm. 2.0_3	2.47157	0.501296	4.55431	0.0270727	0.157878	0.0460277
											Fang_3	25.1062	24.66	26.7413	25.3711	27.5777	36.2974	28.7721	33.4641																							Sherlock net_1	3.36679	0.58099	3.58229	0.00201901	0.223993	0.00892207
																																										Sherlock net_2	4.52832	0.830461	1.63565	0.00837889	0.772306	0.0153619
																																										Sherlock net_3	3.56808	0.639123	2.20698	0.000572194	0.459482	#VALUE!
																																										Fang_1	0.23928	0.0581862	0.268681	0.000286128	0.0386133	0.0054773
																																										Fang_2	2.9951	1.4093	0.285444	0.000174318	0.0721519	0.00296391
																																										Fang_3	0.246427	0.669011	0.17863	0.00021047	0.0391837	0.00264975

[truncated: 1 more sheets: QRT-PCR analysis_Hybrids]
