# Supplementary material for: The duplicated cytochrome P450 CYP6P9a/b confers cross-resistance to a mitochondrial complex I inhibitor in the African malaria vector Anopheles funestus
Source: BMC Genomics. 2025 Sep 26;26:837. doi: 10.1186/s12864-025-11984-1 (PMC12465288; doi:10.1186/s12864-025-11984-1)
Supplement: Supplementary file 5 — Supplementary Material 5 [file 12864_2025_11984_MOESM5_ESM.xlsx]

## Sheet: 6.5 kb
	Genotype and allele frequencies of the 6.5kb insertion and ability of FUMOZ/FANG hybrids to bloodfeed, survive, and survive postbloodfeed (PermaNet 2.0 - WHO tunnel tests)
	Associated statistics of significance computed with GraphPad Prism v8.0.2
	Raw data
	Alive samples					Dead samples
	ID	6.5kb SV	6P9a	6P9b		ID	6.5kb SV	6P9a	6P9b			Summary
	BF_1	RR	RS	RS		BF_1	RR	RS	RR			Genotype distribution between dead and alive
	BF_2	RS	RS	RS		BF_2	RS	RS	SS				RR	RS	SS	Total
	BF_3	RR	RR	RR		BF_3	RR	RS	RS			Dead Blood Fed	11	12	6	29
	BF_4	RR	RS	RS		BF_4	RS	RS	SS			Dead Unfed	8	11	12	31
	BF_5	RS	RS	RS		BF_5	RR	SS	RS			Alive Blood fed	25	10	1	36
	BF_6	RS	RS	RS		BF_6		RS	SS			Alive Unfed	8	9	1	18
	BF_7	RR	RS	RS		BF_7	SS		SS			The ability of hybrids to blood feed							The ability of hybrids to survive exposure
	BF_8	RR	RS	RS		BF_8	RS	SS	RS			Genotype frequency of 6.5kb SV and ability to blood feed							Genotype frequency of the 6.5kb SV and ability to survive exposure
	BF_9	RS	RS	RS		BF_9	SS	RS	SS				RR	RS	SS	total				RR	RS	SS	Total
	BF_10	RR	RS	RS		BF_10	RR	SS	RR			Blood fed	36	22	7	65			Alive unfed	8	9	1	18
	BF_11	RR	RS	RS		BF_11	RS	RR	RS			Unfed	16	20	13	49			Dead unfed	8	11	12	31
	BF_12	RS	RS	RS		BF_12	RS	RS	RS				52	42	20					16	20	13
	BF_13	SS	SS	SS		BF_13	RR	RS	RS																		the ability of hybrids to survive post blood feed
	BF_14	RR	RS	RS		BF_14	RS	RS	RR			%Genotype frequency of 6.5kb SV and ability to blood feed							% Genotype frequency of 6.5 kb SV and ability to survive								The ability of different genotypes of 6.5kb SV to survive post-bloodfeeding
	BF_15	RR	RR	RR		BF_15	RR		RR				RR	RS	SS				%ages	RR	RS	SS						RR	RS	SS
	BF_16		RS	SS		BF_16	RR	RS	RS			Blood fed	69.2308	52.381	35				Alive Unfed	50	45	7.69231					Alive Blood fed	69.4444	45.4545	14.2857
	BF_17	RS		RS		BF_17	RR	RS	RR			Unfed	30.7692	47.619	65				Dead Unfed	50	55	92.3077					Dead Blood Fed	30.5556	54.5455	85.7143
	BF_18	RR		RS		BF_18	RS	RS					100	100	100				total	100	100	100					Total	100	100	100
	BF_19	RR	RR	RR		BF_19	RR	RS	RS			%Genotype frequency of 6.5kb SV and ability to blood feed							% Genotype frequency of 6.5 kb SV and ability to survive
	BF_20	RR	RS	RS		BF_20	RR	RS	RR			%ages	RR	RS	SS	Total				RR	RS	SS	Total
	BF_21	RS	RR	RS		BF_21	RS		RS			BF	55.3846	33.8462	10.7692	100			AU	44.4444	50	5.55556	100
	BF_22	RR	RR	SS		BF_22	SS	RS	RS			UF	32.6531	40.8163	26.5306	100			DU	25.8065	35.4839	38.7097	100
	BF_23	RR	RS	RR		BF_23	SS	RS	SS
	BF_24	RS	RS	RR		BF_24	RR	RS	SS
	BF_25	RR		RS		BF_25	SS	RS	RR
	BF_26	RR	RS	RS		BF_26	SS	RS	SS
	BF_27	RR	RS	RR		BF_27	RS	RS	SS
	BF_28	RR	RS	RS		BF_28	RS		RS
	BF_29	RR	RS	RS		BF_29	RS	RS	RS
	BF_30		RR	RS		BF_30	RS	SS	RS
	BF_31	RR	RR	SS		UF_1	RS	RS	RS
	BF_32	RR	RS	RR		UF_2	RS	RS	RS
	BF_33	RS	RS	RR		UF_3	SS	RS	SS
	BF_34	RS	RR	RS		UF_4	RR	RS	RR
	BF_35	RR	RR	RS		UF_5	SS	RS	SS																		Correlation between the genotypes of 6.5kb SV and ability to survive post bloodfeeding
	BF_36	RR	RR	RR		UF_6	SS		SS																		STATS	OR	CI	p value
	BF_37	RR	RR	RR		UF_7	SS	RS	SS																		RR vs RS	2.72	1.504 to 4.896	0.001
	BF_38	RR	RS	RR		UF_8	RR					% Allele frequency on ability to blood feed							% Allele frequency between Alive unfed and dead unfed								RR vs SS	13.67	6.760 to 27.17	<0.0001
	UF_1	RS	RR	RS		UF_9	RR		RR				R	S	TOTAL					R	S	Total					RS vs SS	5.026	2.551 to 10.12	<0.0001
	UF_2	RR	RR	RR		UF_10	SS		SS			Blood fed	72.3077	27.6923	100				AliveUnFed	69.4444	30.5556	100
	UF_3	RR	RS	RR		UF_11	RS	RS	RS			Unfed	53.0612	46.9388	100				DeadUnFed	43.5484	56.4516	100
	UF_4	RS	SS	RS		UF_12	SS	RS	SS
	UF_5	SS	RS	SS		UF_13	RS	RS	RS
	UF_6	RR	RS	RS		UF_14	RS	RS	RS
	UF_7	RS	RS	RS		UF_15	RR	RS
	UF_8	RS	RR	RS		UF_16	SS	RS	RS
	UF_9	RR	RS	RR		UF_17	RS		SS
	UF_10	RR	SS	SS		UF_18	RS	RS
	UF_11	RS	SS	RS		UF_19	RR	SS
	UF_12	RS	RS	SS		UF_20	RS	RS	RS
	UF_13	RS	RS	RS		UF_21	SS		RS
	UF_14	RS	RS	RS		UF_22	SS	SS	RR
	UF_15		RS	RS		UF_23	RS	SS	RS
	UF_16	RR	RS	RS		UF_24	SS		RS
	UF_17	RR	RS	RR		UF_25	RS		SS
	UF_18	RS	RS	RS		UF_26	RS	RR	RS
	UF_19	RR	RS	RS		UF_27	SS	RR	SS
						UF_28	RR		RS			Correlation between the 6.5 kb and ability to bloodfeed							Correlation between the 6.5 kb and ability to survive
						UF_29	RR		SS			STATS	ODDS RATIO	CI	p value (Fisher's exact test)				Stat	ODDS RATIO	CI	p value (Fisher's exact test)
						UF_30	SS		RR			RR vs RS	2.083	1.123 to 3.973	0.0261				RR vs RS	1.232	0.6362 to 2.301	0.6187
						UF_31	RR		RR			RR vs SS	4.469	1.887 to 10.51	0.0006				RR vs SS	13.38	4.691 to 33.81	<0.0001
												RS vs SS	2.145	0.8737 to 5.158	0.0974				RS vs SS	10.86	4.042 to 27.07	<0.0001
												R vs S	2.314	1.297 to 4.087	0.0078				R vs S	2.995	1.640 to 5.471	0.0003
																			P value and statistical significance
																			Test	Chi-square
																			Chi-square, df	46.69, 2
																			P value	<0.0001
																			P value summary	****
																			One- or two-sided	NA
																			Statistically significant (P < 0.05)?	Yes

## Sheet: 6p9a
	Genotype and allele frequencies of the CYP6P9a_R and ability of FUMOZ/FANG hybrids to bloodfeed, survive, and survive postbloodfeed (PermaNet 2.0 - WHO tunnel tests)
	Associated statistics of significance computed with GraphPad Prism v8.0.2
	Raw data
	Alive samples			Dead samples
	ID	6P9a		ID	6P9a			Summary
	BF_1	RS		BF_1	RS			Genotype distribution between dead and alive
	BF_2	RS		BF_2	RS				RR	RS	SS	Total
	BF_3	RR		BF_3	RS			Dead Blood Fed	1	21	4	26
	BF_4	RS		BF_4	RS			Dead Unfed	2	14	3	19
	BF_5	RS		BF_5	SS			Alive Blood fed	11	23	1	35
	BF_6	RS		BF_6	RS			Alive Unfed	3	13	3	19
	BF_7	RS		BF_7				The ability of hybrids to blood feed							The ability of hybrids to survive exposure
	BF_8	RS		BF_8	SS			Genotype frequency of CYP6P9a and ability to blood feed							Genotype frequency of the CYP6P9a and ability to survive
	BF_9	RS		BF_9	RS				RR	RS	SS	total				RR	RS	SS	Total
	BF_10	RS		BF_10	SS			Blood fed	12	44	5	61			Alive unfed	3	13	3	19
	BF_11	RS		BF_11	RR			Unfed	5	27	6	38			Dead unfed	2	14	3	19
	BF_12	RS		BF_12	RS				17	71	11					5	27	6				The ability of hybrids to survive post blood feed
	BF_13	SS		BF_13	RS			%Genotype frequency of CYP6P9a and ability to blood feed							%Genotype frequency of CYP6P9a and ability to survive							The ability of different genotypes of CYP6P9a to survive post-bloodfeeding
	BF_14	RS		BF_14	RS				RR	RS	SS				%ages	RR	RS	SS					RR	RS	SS
	BF_15	RR		BF_15				Blood fed	70.5882	61.9718	45.4545				Alive unfed	60	48.1481	50				Alive Blood fed	91.6667	52.2727	20
	BF_16	RS		BF_16	RS			Unfed	29.4118	38.0282	54.5455				Dead unfed	40	51.8519	50				Dead Blood Fed	8.33333	47.7273	80
	BF_17			BF_17	RS				100	100	100				Total	100	100	100				Total	100	100	100
	BF_18			BF_18	RS
	BF_19	RR		BF_19	RS			%Genotype frequency of CYP6P9a and ability to blood feed							%Genotype frequency of CYP6P9a and ability to survive
	BF_20	RS		BF_20	RS			%ages	RR	RS	SS				%ages	RR	RS	SS	Total
	BF_21	RR		BF_21				BF	19.6721	72.1311	8.19672				AU	15.7895	68.4211	15.7895	100
	BF_22	RR		BF_22	RS			UF	13.1579	71.0526	15.7895				DU	10.5263	73.6842	15.7895	100
	BF_23	RS		BF_23	RS
	BF_24	RS		BF_24	RS
	BF_25			BF_25	RS
	BF_26	RS		BF_26	RS
	BF_27	RS		BF_27	RS
	BF_28	RS		BF_28
	BF_29	RS		BF_29	RS
	BF_30	RR		BF_30	SS
	BF_31	RR		UF_1	RS
	BF_32	RS		UF_2	RS
	BF_33	RS		UF_3	RS																	Correlation between the genotypes of CYP6P9a and ability to survive post bloodfeeding
	BF_34	RR		UF_4	RS																	STATS	ODDS RATIO	CI	p value (Fisher's exact test)
	BF_35	RR		UF_5	RS																	RR vs RS	10.62	4.723 to 22.53	<0.0001
	BF_36	RR		UF_6																		RR vs SS	46	18.52 to 105.0	<0.0001
	BF_37	RR		UF_7	RS			% CYP6P9a Allele frequency on ability to blood feed							% CYP6P9a Allele frequency between Alive unfed and dead unfed							RS vs SS	4.333	2.309 to 7.919	<0.0001
	BF_38	RS		UF_8					R	S	TOTAL					R	S	Total
	UF_1	RR		UF_9				Blood fed	55.7377	44.2623	100				AliveUnFed	50	50	100
	UF_2	RR		UF_10				Unfed	48.6842	51.3158	100				DeadUnFed	47.3684	52.6316	100
	UF_3	RS		UF_11	RS
	UF_4	SS		UF_12	RS
	UF_5	RS		UF_13	RS
	UF_6	RS		UF_14	RS
	UF_7	RS		UF_15	RS
	UF_8	RR		UF_16	RS
	UF_9	RS		UF_17
	UF_10	SS		UF_18	RS
	UF_11	SS		UF_19	SS
	UF_12	RS		UF_20	RS
	UF_13	RS		UF_21
	UF_14	RS		UF_22	SS
	UF_15	RS		UF_23	SS
	UF_16	RS		UF_24
	UF_17	RS		UF_25				Correlation between the CYP6P9a and ability to bloodfeed							Correlation between CYP6P9a genotypes and mortality of hybrids
	UF_18	RS		UF_26	RR			STATS	ODDS RATIO	CI	p value (Fisher's exact test)				STATS	ODDS RATIO	CI	p value (Fisher's exact test)
	UF_19	RS		UF_27	RR			RR vs RS	1.441	0.6670 to 3.098	0.4349				RR vs RS	1.61	0.6836 to 3.841	0.3857
				UF_28				RR vs SS	2.74	0.9403 to 7.647	0.1022				RR vs SS	1.5	0.5346 to 4.505	0.5881
				UF_29				RS vs SS	1.901	0.7505 to 4.642	0.1843				RS vs SS	0.9315	0.4420 to 1.964	>0.9999
				UF_30				R vs S	1.328	0.7537 to 2.364	0.3934				R vs S	1.106	0.6297 to 1.951	0.7773
				UF_31
								P value of statistical significance
								Test	Chi-square
								Chi-square, df	3.316, 2
								P value	0.1905
								P value summary	ns
								One- or two-sided	NA
								Statistically significant (P < 0.05)?	No

## Sheet: 6p9b
	Genotype and allele frequencies of the CYP6P9b_R and ability of FUMOZ/FANG hybrids to bloodfeed, survive, and survive postbloodfeed (PermaNet 2.0 - WHO tunnel tests)
	Associated statistics of significance computed with GraphPad Prism v8.0.2
	Raw Data
	Alive samples			Dead samples
	ID	6P9b		ID	6P9b
	BF_1	RS		BF_1	RR			Genotype distribution between dead and alive
	BF_2	RS		BF_2	SS				RR	RS	SS	Total
	BF_3	RR		BF_3	RS			Dead Blood Fed	7	13	9	29
	BF_4	RS		BF_4	SS			Dead Unfed	5	12	10	27
	BF_5	RS		BF_5	RS			Alive Blood fed	11	23	4	38
	BF_6	RS		BF_6	SS			Alive Unfed	4	12	3	19
	BF_7	RS		BF_7	SS			The ability of hybrids to blood feed							The ability of hybrids to survive exposure
	BF_8	RS		BF_8	RS			Genotype frequency of CYP6P9b and ability to blood feed							Genotype frequency of CYP6P9b and ability to sruvive
	BF_9	RS		BF_9	SS				RR	RS	SS	total				RR	RS	SS
	BF_10	RS		BF_10	RR			Blood fed	18	36	13	67			Alive unfed	4	12	3	19
	BF_11	RS		BF_11	RS			Unfed	9	24	13	46			Dead unfed	5	12	10	27
	BF_12	RS		BF_12	RS				27	60	26					9	24	13				The ability of hybrids to survive post blood feed
	BF_13	SS		BF_13	RS			%Genotype frequency of CYP6P9b and ability to blood feed							%Genotype frequency of CYP6P9b and ability to survive exposure							%Genotype frequency of CYP6P9b and ability to survive post bloodfeed
	BF_14	RS		BF_14	RR				RR	RS	SS				Alive unfed	44.4444	50	23.0769					RR	RS	SS
	BF_15	RR		BF_15	RR			Blood fed	66.6667	60	50				Dead unfed	55.5556	50	76.9231				Alive Blood fed	61.1111	63.8889	30.7692
	BF_16	SS		BF_16	RS			Unfed	33.3333	40	50											Dead Blood Fed	38.8889	36.1111	69.2308
	BF_17	RS		BF_17	RR																	Total	100	100	100
	BF_18	RS		BF_18				%Genotype frequency of CYP6P9b and ability to blood feed							%Genotype frequency of CYP6P9b and ability to survive exposure
	BF_19	RR		BF_19	RS			%ages	RR	RS	SS					RR	RS	SS	Total
	BF_20	RS		BF_20	RR			BF	26.8657	53.7313	19.403				AU	21.0526	63.1579	15.7895	100
	BF_21	RS		BF_21	RS			UF	19.5652	52.1739	28.2609				DU	18.5185	44.4444	37.037	100
	BF_22	SS		BF_22	RS
	BF_23	RR		BF_23	SS
	BF_24	RR		BF_24	SS
	BF_25	RS		BF_25	RR
	BF_26	RS		BF_26	SS
	BF_27	RR		BF_27	SS
	BF_28	RS		BF_28	RS
	BF_29	RS		BF_29	RS
	BF_30	RS		BF_30	RS
	BF_31	SS		UF_1	RS
	BF_32	RR		UF_2	RS
	BF_33	RR		UF_3	SS																	Correlation between the genotypes of CYP6P9b and ability to survive post bloodfeeding
	BF_34	RS		UF_4	RR																	STATS	ODDS RATIO	CI	p value (Fisher's exact tet)
	BF_35	RS		UF_5	SS			% CYP6P9b Allele frequency on ability to blood feed							% CYP6P9b Allele frequency and ability to survive exposure							RR vs RS	0.8798	0.5024 to 1.533	0.7703
	BF_36	RR		UF_6	SS				R	S	TOTAL					R	S	Total				RR vs SS	3.481	1.911 to 6.216	<0.0001
	BF_37	RR		UF_7	SS			Blood fed	53.7313	46.2687	100				AliveUnFed	52.6316	47.3684	100				RS vs SS	3.957	2.157 to 6.937	<0.0001
	BF_38	RR		UF_8				Unfed	45.6522	54.3478	100				DeadUnFed	40.7407	59.2593	100
	UF_1	RS		UF_9	RR
	UF_2	RR		UF_10	SS
	UF_3	RR		UF_11	RS
	UF_4	RS		UF_12	SS
	UF_5	SS		UF_13	RS
	UF_6	RS		UF_14	RS
	UF_7	RS		UF_15
	UF_8	RS		UF_16	RS
	UF_9	RR		UF_17	SS
	UF_10	SS		UF_18
	UF_11	RS		UF_19
	UF_12	SS		UF_20	RS
	UF_13	RS		UF_21	RS
	UF_14	RS		UF_22	RR
	UF_15	RS		UF_23	RS
	UF_16	RS		UF_24	RS			Correlation between the CYP6P9b and the bloodfeeding success							Correlation between CYP6P9b genotypes and mortality of hybrids
	UF_17	RR		UF_25	SS			STATS	ODDS RATIO	CI	p value (Fisher's exact test)				Stat	ODDS RATIO	CI	p value (Fisher's exact test)
	UF_18	RS		UF_26	RS			RR vs RS	1.343	0.6663 to 2.623	0.4769				RR vs RS	0.8148	0.4009 to 1.690	0.7054
	UF_19	RS		UF_27	SS			RR vs SS	2.017	0.9013 to 4.657	0.1438				RR vs SS	2.878	1.220 to 6.525	0.0186
				UF_28	RS			RS vs SS	1.343	0.6663 to 2.623	0.4769				RS vs SS	3.532	1.771 to 7.303	0.0004
				UF_29	SS			R vs S	1.383	0.7851 to 2.462	0.3198				R vs S	1.632	0.9222 to 2.812	0.1168
				UF_30	RR										P value and statistical significance
				UF_31	RR										Test	Chi-square
															Chi-square, df	16.9, 2
															P value	0.0002
															P value summary	***
															One- or two-sided	NA
															Statistically significant (P < 0.05)?	Yes

## Sheet: Combined
	Combined Genotype and allele frequencies of markers (6.5kb SV + CYP6P9a + CYP6P9b) and ability of FUMOZ/FANG hybrids to bloodfeed, survive, and survive postbloodfeed (PermaNet 2.0 - WHO tunnel tests)
	Associated statistics of significance computed with GraphPad Prism v8.0.2
	Raw data
	Alive samples					Dead samples
	ID	6.5kb SV	6P9a	6P9b		ID	6.5kb SV	6P9a	6P9b
	BF_1	RR	RS	RS		BF_1	RR	RS	RR				RR/RR/RR	RR/RR/RS	RS/RS/RS	RR/RS/RR	RS/RS/RR	RR/RS/SS	RR/RS/RS	RR/SS/RR	RS/RR/RS	RR/SS/SS	SS/SS/SS	SS/RS/RR	RR/SS/RS	SS/RS/RS	RS/SS/RS	Total
	BF_2	RS	RS	RS		BF_2	RS	RS	SS			Dead Blood Fed	0	0	2	3	1	1	4	1	1	0	0	1	1	1	2	18
	BF_3	RR	RR	RR		BF_3	RR	RS	RS			Dead Unfed	0	0	6	1	0	0	0	0	1	0	0	0	0	1	1	10
	BF_4	RR	RS	RS		BF_4	RS	RS	SS			Alive Blood fed	5	1	5	4	1	0	11	0	2	0	1	0	0	0	0	30
	BF_5	RS	RS	RS		BF_5	RR	SS	RS			Alive Unfed	1	0	4	3	0	0	3	0	2	1	0	0	0	0	2	16
	BF_6	RS	RS	RS		BF_6		RS	SS
	BF_7	RR	RS	RS		BF_7	SS		SS			Summary (the combined genotypes (6.5kb SV + CYP6P9a + CYP6P9b))
	BF_8	RR	RS	RS		BF_8	RS	SS	RS				RR/RR/RR	RR/RR/RS	RS/RS/RS	RR/RS/SS	RS/SS/RS	RR/SS/SS	SS/RS/RS	SS/SS/SS	Total
	BF_9	RS	RS	RS		BF_9	SS	RS	SS			Dead Blood Fed	0	7	4	3	2	0	2	0	18
	BF_10	RR	RS	RS		BF_10	RR	SS	RR			Dead Unfed	0	1	7	0	1	0	1	0	10
	BF_11	RR	RS	RS		BF_11	RS	RR	RS			Alive Blood fed	5	16	8	0	0	0	0	1	30
	BF_12	RS	RS	RS		BF_12	RS	RS	RS			Alive Unfed	1	6	6	0	2	1	0	0	16
	BF_13	SS	SS	SS		BF_13	RR	RS	RS
	BF_14	RR	RS	RS		BF_14	RS	RS	RR			The ability of hybrids possessing the three genotypes (6.5kb SV + CYP6P9a + CYP6P9b) to blood feed														The ability of hybrids possessing the three genotypes (6.5kb SV + CYP6P9a + CYP6P9b) to survive exposure
	BF_15	RR	RR	RR		BF_15	RR		RR			Genotype frequency of combined genotypes (6.5kb SV + CYP6P9a + CYP6P9b) and ability to blood feed														Genotype frequency of the combined genotypes (6.5kb SV + CYP6P9a + CYP6P9b) and ability to survive
	BF_16		RS	SS		BF_16	RR	RS	RS				RR/RR/RR	RR/RR/RS	RS/RS/RS	RR/RS/SS	RS/SS/RS	RR/SS/SS	SS/RS/RS	SS/SS/SS	Total						RR/RR/RR	RR/RR/RS	RS/RS/RS	RS/SS/RS	RR/SS/SS	SS/RS/RS	SS/SS/SS	Total
	BF_17	RS		RS		BF_17	RR	RS	RR			Blood fed	5	23	12	3	2	0	2	1	48					Alive Unfed	1	6	6	2	1	0	0	16
	BF_18	RR		RS		BF_18	RS	RS				Un fed	1	7	13	0	3	1	1	0	26					Dead Unfed	0	1	7	1	0	1	0	10
	BF_19	RR	RR	RR		BF_19	RR	RS	RS				6	30	25	3	5	1	3	1							1	7	13	3	1	1	0
	BF_20	RR	RS	RS		BF_20	RR	RS	RR																												The ability of hybrids possessing the three genotypes (6.5kb SV + CYP6P9a + CYP6P9b) to survive post blood feed
	BF_21	RS	RR	RS		BF_21	RS		RS			%Genotype frequency of combined genotypes (6.5kb SV + CYP6P9a + CYP6P9b) and ability to blood feed														%Genotype frequency of the combined genotypes (6.5kb SV + CYP6P9a + CYP6P9b) and ability to survive											% Genotype of the combined genotypes (6.5kb SV + CYP6P9a + CYP6P9b) and ability to survive post bloofd feed
	BF_22	RR	RR	SS		BF_22	SS	RS	RS				RR/RR/RR	RR/RR/RS	RS/RS/RS	RR/RS/SS	RS/SS/RS	RR/SS/SS	SS/RS/RS	SS/SS/SS							RR/RR/RR	RR/RR/RS	RS/RS/RS	RS/SS/RS	RR/SS/SS	SS/RS/RS						RR/RR/RR	RR/RR/RS	RS/RS/RS	RR/RS/SS	RS/SS/RS	SS/RS/RS	SS/SS/SS
	BF_23	RR	RS	RR		BF_23	SS	RS	SS			Blood fed	83.3333	76.6667	48	100	40	0	66.6667	100						Alive Unfed	100	85.7143	46.1538	66.6667	100	0					Dead Blood Fed	0	30.4348	33.3333	100	100	100	0
	BF_24	RS	RS	RR		BF_24	RR	RS	SS			Un fed	16.6667	23.3333	52	0	60	100	33.3333	0						Dead Unfed	0	14.2857	53.8462	33.3333	0	100					Alive Blood fed	100	69.5652	66.6667	0	0	0	100
	BF_25	RR		RS		BF_25	SS	RS	RR
	BF_26	RR	RS	RS		BF_26	SS	RS	SS
	BF_27	RR	RS	RR		BF_27	RS	RS	SS
	BF_28	RR	RS	RS		BF_28	RS		RS
	BF_29	RR	RS	RS		BF_29	RS	RS	RS
	BF_30		RR	RS		BF_30	RS	SS	RS
	BF_31	RR	RR	SS		UF_1	RS	RS	RS
	BF_32	RR	RS	RR		UF_2	RS	RS	RS
	BF_33	RS	RS	RR		UF_3	SS	RS	SS
	BF_34	RS	RR	RS		UF_4	RR	RS	RR
	BF_35	RR	RR	RS		UF_5	SS	RS	SS
	BF_36	RR	RR	RR		UF_6	SS		SS
	BF_37	RR	RR	RR		UF_7	SS	RS	SS
	BF_38	RR	RS	RR		UF_8	RR
	UF_1	RS	RR	RS		UF_9	RR		RR
	UF_2	RR	RR	RR		UF_10	SS		SS
	UF_3	RR	RS	RR		UF_11	RS	RS	RS																	Correlation between the combined three genotypes (6.5kb SV + CYP6P9a + CYP6P9b) and ability to survive											Correlation between the genotypes of CYP6P9b and ability to survive post bloodfeeding
	UF_4	RS	SS	RS		UF_12	SS	RS	SS																		ODDS RATIO	CI	p value (Fisher's exact test)									ODDS RATIO	CI	p value (Fisher's exact test)
	UF_5	SS	RS	SS		UF_13	RS	RS	RS																	RR/RR/RR vs Ss/RS/RS	Infinity	1980 to Infinity	<0.0001								RR/RR/RR vs SS/SS/SS
	UF_6	RR	RS	RS		UF_14	RS	RS	RS																	RR/RR/RR vs RS/SS/RS	Infinity	33.88 to Infinity	<0.0001								RR/RR/RR vs SS/RS/RS	Infinity	1980 to Infinity	<0.0001
	UF_7	RS	RS	RS		UF_15	RR	RS																		RR/RR/RR vs RS/RS/RS	Infinity	14.07 to Infinity	<0.0001								RR/RR/RR vs RS/SS/RS	Infinity	1980 to Infinity	<0.0001
	UF_8	RS	RR	RS		UF_16	SS	RS	RS																	RR/RR/RR vs RR/RR/RS	Infinity	4.14 to Infinity	<0.0001								RR/RR/RR vs RR/RS/SS	Infinity	1980 to Infinity	<0.0001
	UF_9	RR	RS	RR		UF_17	RS		SS																	RR/RR/RS vs SS/RS/RS	Infinity	156.1 to Infinity	<0.0001								RR/RR/RR vs RS/RS/RS	Infinity	14.07 to Infinity	<0.0001
	UF_10	RR	SS	SS		UF_18	RS	RS																		RR/RR/RS vs RS/SS/RS	3.026	1.48 to 6.22	0.0025								RR/RR/RR vs RR/RR/RS	Infinity	12.16 to Infinity	<0.0001
	UF_11	RS	SS	RS		UF_19	RR	SS																		RR/RR/RS vs RS/RS/RS	7.2	3.68 to 14.53	<0.0001								RR/RR/RS vs SS/SS/SS
	UF_12	RS	RS	SS		UF_20	RS	RS	RS																	RS/RS/RS vs SS/rS/RS	Infinity	57.58 to Infinity	<0.0001								RR/RR/RS vs SS/RS/RS	Infinity	65.68 to Infinity	<0.0001
	UF_13	RS	RS	RS		UF_21	SS		RS																	RS/RS/RS vs RS/SS/RS	2.38	1.33 to 4.23	0.0042								RR/RR/RS vs RS/SS/RS	Infinity	65.68 to Infinity	<0.0001
	UF_14	RS	RS	RS		UF_22	SS	SS	RR																	RS/SS/RS vs SS/RS/RS	Infinity	24.63 to Infinity	<0.0001								RR/RR/RS vs RR/RS/SS	Infinity	65.68 to Infinity	<0.0001
	UF_15		RS	RS		UF_23	RS	SS	RS																												RR/RR/RS vs RS/RS/RS	1.15	0.64 to 2.12	0.7609
	UF_16	RR	RS	RS		UF_24	SS		RS																												RS/RS/RS vs SS/SS/SS
	UF_17	RR	RS	RR		UF_25	RS		SS																												RS/RS/RS vs SS/RS/RS	Infinity	57.58 to Infinity	<0.0001
	UF_18	RS	RS	RS		UF_26	RS	RR	RS																												RSRS/RS vs RS/SS/RS	Infinity	57.58 to Infinity	<0.0001
	UF_19	RR	RS	RS		UF_27	SS	RR	SS																												RS/RS/RS vs RR/RS/SS	Infinity	57.58 to Infinity	<0.0001
						UF_28	RR		RS																												RR/RS/SS vs SS/SS/SS
						UF_29	RR		SS																												RR/RS/SS vs SS/RS/RS			>0.9999
						UF_30	SS		RR																												RR/RS/SS vs RS/SS/RS			>0.9999
						UF_31	RR		RR																												RS/SS/RS vs SS/SS/SS
																																					RS/SS/RS vs SS/RS/RS			>0.9999
