# Supplementary material for: The duplicated cytochrome P450 CYP6P9a/b confers cross-resistance to a mitochondrial complex I inhibitor in the African malaria vector Anopheles funestus
Source: BMC Genomics. 2025 Sep 26;26:837. doi: 10.1186/s12864-025-11984-1 (PMC12465288; doi:10.1186/s12864-025-11984-1)
Supplement: Supplementary file 6 — Supplementary Material 6 [file 12864_2025_11984_MOESM6_ESM.xlsx]

## Sheet: 6.5kb
	Genotype and allele frequencies of the 6.5kb insertion and ability of FUMOZ/FANG hybrids to bloodfeed, survive, and survive postbloodfeed (0.7% incorporated Sherlock net - WHO tunnel tests)
	Associated statistics of significance computed with GraphPad Prism v8.0.2
	Raw data
	Alive samples					Dead samples
	ID	6.5kb SV	6P9a	6P9b		ID	6.5kb SV	6P9a	6P9b			Summary
	BF_1	RR	RR	RR		BF_1	RS	RS	RS			Genotype distribution between dead and alive
	BF_2	RS	RS	RS		BF_2	RR	RR	RS				RR	RS	SS	Total
	BF_3	RR	RS	RR		BF_3	RS	RR	RS			Dead Blood Fed	18	8	0	26
	BF_4	RS	RS	RS		BF_4	RR	RR	RS			Dead Unfed	4	15	9	28
	BF_5	RS	RS	RS		BF_5		RS	RS			Alive Blood fed	20	9	0	29
	BF_6	RS	RS	RS		BF_6	RS	RS	RS			Alive Unfed	16	9	0	25
	BF_7	RS	RS	RR		BF_7	RR	RR	RS
	BF_8	RR	RR	RR		BF_8	RR	RS	RS			The ability of hybrids to blood feed							The ability of hybrids to survive exposure
	BF_9	RR	RR	RR		BF_9	RS	RS	RS			Genotype frequency of 6.5kb SV and ability to blood feed							Genotype frequency of the 6.5kb SV and ability to survive exposure
	BF_10	RR	RR	RR		BF_10	RR	RS	RS				RR	RS	SS	total				RR	RS	SS
	BF_11	RR	RR	RR		BF_11	RS	RS	RS			Blood fed	38	17	0	55			Alive unfed	16	9	0	25
	BF_12	RR	RR	RR		BF_12	RR	RS	RR			Unfed	20	24	9	53			Dead unfed	4	15	9	28
	BF_13	RR	RR	RR		BF_13	RS	RS	RS				58	41	9					20	24	9
	BF_14	RR	RS			BF_14	RR	SS	SS
	BF_15	RR	RR			BF_15	RS	SS	SS			%Genotype frequency of 6.5kb SV and ability to blood feed							% Genotype frequency of 6.5 kb SV and ability to survive							the ability of hybrids to survive post blood feed
	BF_16		RR	RR		BF_16	RR	RR	RR			%ages	RR	RS	SS				%ages	RR	RS	SS				The ability of different genotypes of 6.5kb SV to survive post-bloodfeeding
	BF_17	RS	RR	RR		BF_17	RR	SS	SS			BF	69.0909	30.9091	0				Alive Unfed	80	37.5	0					RR	RS	SS
	BF_18	RS	RS	RR		BF_18	RR	RS	RS			UF	37.7358	45.283	16.9811				Dead Unfed	20	62.5	100				Alive blood-fed	52.6316	52.9412	#DIV/0!
	BF_19	RR	RR	RS		BF_19	RR	SS	RS											100	100	100				Dead Blood-fed	47.3684	47.0588	#DIV/0!
	BF_20	RR	RR	RS		BF_20	RR	RS	RS
	BF_21	RR	RS	SS		BF_21	RS	RS	RS
	BF_22	RR	RS	RS		BF_22	RR	SS	SS
	BF_23	RR	RS	RS		BF_23	RR	RS	RS
	BF_24	RR	RS	RS		BF_24	RR	RS	RS
	BF_25	RR	RS	RS		BF_25	RR	RS	RS
	BF_26	RS	RR	RS		BF_26	RR	SS	RS
	BF_27	RR	SS	RR		BF_27	RR	RS	RS
	BF_28	RR	RR	RS		UF_1	SS	RS	RR
	BF_29	RS	RR	RR		UF_2	SS	RS	RS
	BF_30	RR	RR	RR		UF_3	RR	RR	RR
	UF_1	RR	RS	RR		UF_4	SS	RR	RR
	UF_2	RR	RS	RS		UF_5	RS	RS
	UF_3	RS	RS	RS		UF_6	SS	RS	RS
	UF_4	RR	RR	RR		UF_7	RS	RS	RR
	UF_5	RR	RR	RR		UF_8	RS	RS	RS			% Allele frequency on ability to blood feed							% Allele frequency between Alive unfed and dead unfed
	UF_6	RS	RS	RS		UF_9	SS	RS	RS				R	S	TOTAL					R	S	Total
	UF_7	RS	RR	RR		UF_10	RS	RS	RS			Blood fed	84.5455	15.4545	100				AliveUF	82	18	100				STATS	OR	CI	p value
	UF_8	RR	RS	RS		UF_11	RR	RR	RR			Unfed	60.3774	39.6226	100				DeadUF	41.0714	58.9286	100				RR vs SS
	UF_9	RR	RR	RR		UF_12	RS	RR	RR																	RS vs SS
	UF_10	RS		RR		UF_13	SS	RR	RR																	RR vs RS
	UF_11	RR	RR	RR		UF_14	RS	RR	RR
	UF_12	RS	RR	RR		UF_15	RR	RR	RR
	UF_13	RR	RR	RR		UF_16	SS	SS	SS
	UF_14	RR	RS	RS		UF_17	RS	RR	RR
	UF_15	RR	RS	RS		UF_18	RS	RS	RS
	UF_16	RR		RS		UF_19	RS	SS	RS
	UF_17	RS	RS	RS		UF_20	SS	SS	SS
	UF_18	RS		RS		UF_21	RS	RS	RS
	UF_19	RR	RR	RR		UF_22	RS	RS	RS
	UF_20	RS	RS	RS		UF_23	RR	RR	RR
	UF_21	RR	RR	RR		UF_24	RS	RS	RS
	UF_22	RS	RS	RS		UF_25	RS	RS	RS
	UF_23	RR	RR	RR		UF_26	RS	RS	RS
	UF_24	RR	RS	RS		UF_27	RS	RS	RS
	UF_25	RR	RR	RR		UF_28	SS	SS	SS
												Correlation between the 6.5 kb and ability to bloodfeed							Correlation between the 6.5 kb and ability to survive
												STATS	OR	CI	p value (Fisher's exact test)				Stat	OR	CI	p value (Fisher's exact test)
												RR vs RS	2.797	1.513 to 5.104	0.0014				RR vs RS	6.73	3.233 to 13.42	<0.0001
												RR vs SS	Infinity	7.901 to Infinity	<0.0001				RR vs SS	Infinity	34.72 to Infinity	<0.0001
												RS vs SS	Infinity	2.723 to Infinity	0.001				RS vs SS	Infinity	5.828 to Infinity	<0.0001
												R vs S	3.778	1.935 to 7.347	0.0001				R vs S	6.556	3.393 to 12.64	<0.0001
																			P value and statistical significance
																			Test	Chi-square
																			Chi-square, df	134.5, 2
																			P value	<0.0001
																			P value summary	****
																			One- or two-sided	NA
																			Statistically significant (P < 0.05)?	Yes

## Sheet: 6P9a
	Genotype and allele frequencies of the CYP6P9a_R and ability of FUMOZ/FANG hybrids to bloodfeed, survive, and survive postbloodfeed (0.7% incorporated Sherlock net - WHO tunnel tests)
	Associated statistics of significance computed with GraphPad Prism v8.0.2
	Raw data
	Alive samples			Dead samples
	ID	6P9a		ID	6P9a			Summary
	BF_1	RR		BF_1	RS			Genotype distribution between dead and alive
	BF_2	RS		BF_2	RR				RR	RS	SS	Total
	BF_3	RS		BF_3	RR			Dead Blood Fed	5	16	6	27
	BF_4	RS		BF_4	RR			Dead Unfed	9	15	4	28
	BF_5	RS		BF_5	RS			Alive Blood fed	16	13	1	30
	BF_6	RS		BF_6	RS			Alive Unfed	11	11	0	22
	BF_7	RS		BF_7	RR			total	41	55	11	107
	BF_8	RR		BF_8	RS			The ability of hybrids to blood feed							The ability of hybrids to survive exposure
	BF_9	RR		BF_9	RS			Genotype frequency of CYP6P9a and ability to blood feed							Genotype frequency of the CYP6P9a and ability to survive
	BF_10	RR		BF_10	RS				RR	RS	SS	total				RR	RS	SS
	BF_11	RR		BF_11	RS			Blood fed	21	29	7	57			Alive unfed	11	11	0	22
	BF_12	RR		BF_12	RS			Unfed	20	26	4	50			Dead unfed	9	15	4	28
	BF_13	RR		BF_13	RS				41	55	11					20	26	4					the ability of hybrids to survive post blood feed
	BF_14	RS		BF_14	SS			%Genotype frequency of CYP6P9a and ability to blood feed							%Genotype frequency of the CYP6P9a and ability to survive								The ability of different genotypes of CYP6P9a to survive post-bloodfeeding
	BF_15	RR		BF_15	SS			%ages	RR	RS	SS				%ages	RR	RS	SS						RR	RS	SS
	BF_16	RR		BF_16	RR			BF	51.2195	52.7273	63.6364				Alive Unfed	55	42.3077	0					Alive Blood fed	76.1905	44.8276	14.2857
	BF_17	RR		BF_17	SS			UF	48.7805	47.2727	36.3636				Dead Unfed	45	57.6923	100					Dead Blood Fed	23.8095	55.1724	85.7143
	BF_18	RS		BF_18	RS			Total	100	100	100				Total	100	100	100					Total	0	0	0
	BF_19	RR		BF_19	SS			%Genotype frequency of CYP6P9a and ability to blood feed							%Genotype frequency of the CYP6P9a and ability to survive
	BF_20	RR		BF_20	RS			%ages	RR	RS	SS					RR	RS	SS	Total
	BF_21	RS		BF_21	RS			BF	36.8421	50.8772	12.2807	100			AU	50	50	0	100
	BF_22	RS		BF_22	SS			UF	40	52	8	100			DU	32.1429	53.5714	14.2857	100
	BF_23	RS		BF_23	RS
	BF_24	RS		BF_24	RS
	BF_25	RS		BF_25	RS
	BF_26	RR		BF_26	SS
	BF_27	SS		BF_27	RS
	BF_28	RR		UF_1	RS
	BF_29	RR		UF_2	RS
	BF_30	RR		UF_3	RR
	UF_1	RS		UF_4	RR
	UF_2	RS		UF_5	RS
	UF_3	RS		UF_6	RS
	UF_4	RR		UF_7	RS
	UF_5	RR		UF_8	RS
	UF_6	RS		UF_9	RS
	UF_7	RR		UF_10	RS
	UF_8	RS		UF_11	RR																		Correlation between the genotypes of CYP6P9a and ability to survive post bloodfeeding
	UF_9	RR		UF_12	RR																		STATS	ODDS RATIO	CI	p value (Fisher's exact test)
	UF_10			UF_13	RR																		RR vs RS	3.87	2.140 to 7.079	<0.0001
	UF_11	RR		UF_14	RR			% CYP6P9a Allele frequency on ability to blood feed							% CYP6P9a Allele frequency between Alive unfed and dead unfed								RR vs SS	19.45	9.250 to 38.48	<0.0001
	UF_12	RR		UF_15	RR				R	S	TOTAL					R	S	Total					RS vs SS	5.026	2.551 to 10.12	0.0177
	UF_13	RR		UF_16	SS			Blood fed	62.2807	37.7193	100				AliveUF	75	25	100
	UF_14	RS		UF_17	RR			Unfed	66	34	100				DeadUF	58.9286	41.0714	100
	UF_15	RS		UF_18	RS
	UF_16			UF_19	SS
	UF_17	RS		UF_20	SS
	UF_18			UF_21	RS
	UF_19	RR		UF_22	RS
	UF_20	RS		UF_23	RR
	UF_21	RR		UF_24	RS
	UF_22	RS		UF_25	RS
	UF_23	RR		UF_26	RS
	UF_24	RS		UF_27	RS
	UF_25	RR		UF_28	SS
								Correlation between the CYP6P9a and ability to bloodfeed							Correlation between CYP6P9a genotypes and mortality of hybrids
								STATS	ODDS RATIO	CI	p value (Fisehr's exact test)				STATS	ODDS RATIO	CI	p value (Fisher's exact test)
								RR vs RS	0.936	0.5121 to 1.703	0.88				RR vs RS	1.656	0.9303 to 3.020	0.1037
								RR vs SS	0.6	0.2148 to 1.668	0.4515				RR vs SS	Infinity	6.275 to Infinity	<0.0001
								RS vs SS	1.56	0.2405 to 1.689	0.4653				RS vs SS	Infinity	3.193 to Infinity	0.0003
								R vs S	1.158	0.6551 to 2.062	0.6587				R vs S	6.556	3.393 to 12.64	<0.0001
																P value and statistical significance
																Test	Chi-square
																Chi-square, df	75.74, 2
																P value	<0.0001
																P value summary	****
																One- or two-sided	NA
																Statistically significant (P < 0.05)?	Yes

## Sheet: 6P9b
	Genotype and allele frequencies of the CYP6P9b_R and ability of FUMOZ/FANG hybrids to bloodfeed, survive, and survive postbloodfeed (0.7% incorporated Sherlock net - WHO tunnel tests)
	Associated statistics of significance computed with GraphPad Prism v8.0.2
	Alive samples				Dead samples
	ID	6P9b			ID	6P9b			Summary
	BF_1	RR			BF_1	RS			Genotype distribution between dead and alive
	BF_2	RS			BF_2	RS				RR	RS	SS	Total
	BF_3	RR			BF_3	RS			Dead Blood Fed	2	21	4	27
	BF_4	RS			BF_4	RS			Dead Unfed	11	13	3	27
	BF_5	RS			BF_5	RS			Alive Blood fed	15	12	1	28
	BF_6	RS			BF_6	RS			Alive Unfed	13	12	0	25
	BF_7	RR			BF_7	RS			Total	41	58	8	107
	BF_8	RR			BF_8	RS
	BF_9	RR			BF_9	RS			The ability of hybrids to blood feed								The ability of hybrids to survive exposure
	BF_10	RR			BF_10	RS			Genotype frequency of CYP6P9b and ability to blood feed								Genotype frequency of CYP6P9b and ability to sruvive
	BF_11	RR			BF_11	RS				RR	RS	SS	total					RR	RS	SS
	BF_12	RR			BF_12	RR			Blood fed	17	33	5	55				Alive unfed	13	12	0	25
	BF_13	RR			BF_13	RS			Unfed	24	25	3	52				Dead unfed	11	13	3	27
	BF_14				BF_14	SS				41	58	8						24	25	3					the ability of hybrids to survive post blood feed
	BF_15				BF_15	SS			%Genotype frequency of CYP6P9b and ability to blood feed								%Genotype frequency of CYP6P9b and ability to survive exposure								%Genotype frequency of CYP6P9b and ability to survive post bloodfeed
	BF_16	RR			BF_16	RR				RR	RS	SS					%ages	RR	RS	SS					Alive Blood fed	88.2353	36.3636	20
	BF_17	RR			BF_17	SS			BF	41.4634	56.8966	62.5					Alive Unfed	54.1667	48	0					Dead Blood Fed	11.7647	63.6364	80
	BF_18	RR			BF_18	RS			UF	58.5366	43.1034	37.5					Dead Unfed	45.8333	52	100					Total	100	100	100
	BF_19	RS			BF_19	RS			Total	100	100	100						100	100	100
	BF_20	RS			BF_20	RS			%Genotype frequency of CYP6P9b and ability to blood feed								%Genotype frequency of CYP6P9b and ability to survive exposure
	BF_21	SS			BF_21	RS			%ages	RR	RS	SS	Total					RR	RS	SS	Total
	BF_22	RS			BF_22	SS			BF	30.9091	60	9.09091	100				AU	52	48	0	100
	BF_23	RS			BF_23	RS			UF	46.1538	48.0769	5.76923	100				DU	40.7407	48.1481	11.1111	100
	BF_24	RS			BF_24	RS
	BF_25	RS			BF_25	RS
	BF_26	RS			BF_26	RS
	BF_27	RR			BF_27	RS
	BF_28	RS			UF_1	RR
	BF_29	RR			UF_2	RS
	BF_30	RR			UF_3	RR
	UF_1	RR			UF_4	RR
	UF_2	RS			UF_5
	UF_3	RS			UF_6	RS
	UF_4	RR			UF_7	RR
	UF_5	RR			UF_8	RS
	UF_6	RS			UF_9	RS
	UF_7	RR			UF_10	RS																			Correlation between the genotypes of CYP6P9b and ability to survive post bloodfeeding
	UF_8	RS			UF_11	RR																			STATS	ODDS RATIO	CI	p value (Fisher's exact tet)
	UF_9	RR			UF_12	RR																			RR vs RS	13.04	6.254 to 26.61	<0.0001
	UF_10	RR			UF_13	RR			% CYP6P9b Allele frequency on ability to blood feed								% CYP6P9b Allele frequency and ability to survive exposure								RR vs SS	29.33	13.59 to 61.66	<0.0001
	UF_11	RR			UF_14	RR				R	S	TOTAL						R	S	total					RS vs SS	2.25	1.212 to 4.168	0.0177
	UF_12	RR			UF_15	RR			Blood fed	60.9091	39.0909	100					AliveUF	76	24	100
	UF_13	RR			UF_16	SS			Unfed	70.1923	29.8077	100					DeadUF	64.8148	35.1852	100
	UF_14	RS			UF_17	RR
	UF_15	RS			UF_18	RS
	UF_16	RS			UF_19	RS
	UF_17	RS			UF_20	SS
	UF_18	RS			UF_21	RS
	UF_19	RR			UF_22	RS
	UF_20	RS			UF_23	RR
	UF_21	RR			UF_24	RS
	UF_22	RS			UF_25	RS
	UF_23	RR			UF_26	RS
	UF_24	RS			UF_27	RS
	UF_25	RR			UF_28	SS
									Correlation between the CYP6P9b and the bloodfeeding success								Correlation between CYP6P9b genotypes and mortality of hybrids
									STATS	ODDS RATIO	CI	p value (Fisher's exact test)					Stat	ODDS RATIO	CI	p value (Fisher's exact test)
									RR vs RS	0.5217	0.2949 to 0.9415	0.0366					RR vs RS	1.28	0.4066 to 4.198	0.3843
									RR vs SS	0.3623	0.1248 to 1.229	0.1405					RR vs SS	Infinity	3.967 to Infinity	0.0002
									RS vs SS	0.6944	0.2480 to 2.213	0.581					RS vs SS	Infinity	3.077 to Infinity	0.001
									R vs S	0.6374	0.3467 to 1.143	0.1778					R vs S	1.732	0.9213 to 3.213	0.0892
																		P value and statistical significance
																		Test	Chi-square
																		Chi-square, df	78.74, 2
																		P value	<0.0001
																		P value summary	****
																		One- or two-sided	NA
																		Statistically significant (P < 0.05)?	Yes

## Sheet: Combined
	Combined Genotype and allele frequencies of markers (6.5kb SV + CYP6P9a + CYP6P9b) and ability of FUMOZ/FANG hybrids to bloodfeed, survive, and survive postbloodfeed (0.7% incorporated Sherlock net - WHO tunnel tests)
	Associated statistics of significance computed with GraphPad Prism v8.0.2
	Raw data
	Alive samples					Dead samples
	ID	6.5kb SV	6P9a	6P9b		ID	6.5kb SV	6P9a	6P9b
	BF_1	RR	RR	RR		BF_1	RS	RS	RS			Summary
	BF_2	RS	RS	RS		BF_2	RR	RR	RS
	BF_3	RR	RS	RR		BF_3	RS	RR	RS				RR/RR/RR	RR/RR/RS	RS/RS/RS	RR/RS/RR	RS/RS/RR	RS/RR/RR	RR/RS/SS	RR/RS/RS	RR/SS/RR	RS/RR/RS	RR/SS/SS	RS/SS/SS	SS/SS/SS	SS/RS/RR	RR/SS/RS	SS/RS/RS	SS/RR/RR	RS/SS/RS	Total
	BF_4	RS	RS	RS		BF_4	RR	RR	RS			Dead Blood Fed	1	3	6	1	0	0	0	8	0	1	3	1	0	0	2	0	0	0	26
	BF_5	RS	RS	RS		BF_5		RS	RS			Dead Unfed	4	0	9	0	1	3	0	0	0	0	0	0	3	1	0	3	2	1	27
	BF_6	RS	RS	RS		BF_6	RS	RS	RS			Alive Blood fed	8	3	4	1	2	2	1	4	1	1	0	0	0	0	0	0	0	0	27
	BF_7	RS	RS	RR		BF_7	RR	RR	RS			Alive Unfed	9	0	5	1	0	2	0	5	0	0	0	0	0	0	0	0	0	0	22
	BF_8	RR	RR	RR		BF_8	RR	RS	RS
	BF_9	RR	RR	RR		BF_9	RS	RS	RS			The ability of hybrids possessing the three genotypes (6.5kb SV + CYP6P9a + CYP6P9b) to blood feed
	BF_10	RR	RR	RR		BF_10	RR	RS	RS			Summary (the combined genotypes (6.5kb SV + CYP6P9a + CYP6P9b))
	BF_11	RR	RR	RR		BF_11	RS	RS	RS				RR/RR/RR	RR/RR/RS	RS/RS/RS	RS/RS/RR	RR/RS/SS	RR/SS/RR	RR/SS/SS	RS/SS/SS	SS/RS/RS	SS/SS/SS	Total
	BF_12	RR	RR	RR		BF_12	RR	RS	RR			Dead Blood Fed	1	4	6	9	2	0	3	1	0	0	26
	BF_13	RR	RR	RR		BF_13	RS	RS	RS			Dead Unfed	4	3	9	1	1	2	0	0	4	3	28
	BF_14	RR	RS			BF_14	RR	SS	SS			Alive Blood fed	8	6	4	7	1	1	0	0	0	0	27
	BF_15	RR	RR			BF_15	RS	SS	SS			Alive Unfed	9	3	5	5	0	0	0	0	0	0	22				The ability of hybrids possessing the three genotypes (6.5kb SV + CYP6P9a + CYP6P9b) to survive exposure
	BF_16		RR	RR		BF_16	RR	RR	RR																		Genotype frequency of the combined genotypes (6.5kb SV + CYP6P9a + CYP6P9b) and ability to survive													The ability of hybrids possessing the three genotypes ( 6.5kb SV + CYP6P9a + CYP6P9b) to survive post blood feed
	BF_17	RS	RR	RR		BF_17	RR	SS	SS			Genotype frequency of combined genotypes (6.5kb SV + CYP6P9a + CYP6P9b) and ability to blood feed																RR/RR/RR	RR/RR/RS	RS/RS/RS	RS/RS/RR	RR/RS/SS	RR/SS/RR	SS/RS/RS	SS/SS/SS	Total				Genotype of the combined genotypes (6.5kb SV + CYP6P9a + CYP6P9b) and ability to survive post bloofd feed
	BF_18	RS	RS	RR		BF_18	RR	RS	RS				RR/RR/RR	RR/RR/RS	RS/RS/RS	RS/RS/RR	RR/RS/SS	RR/SS/RR	RR/SS/SS	SS/RS/RS	SS/SS/SS	total					Alive Unfed	9	3	5	5	0	0	0	0	22					RR/RR/RR	RR/RR/RS	RS/RS/RS	RS/RS/RR	RR/RS/SS	RR/SS/RR	RR/SS/SS	SS/RS/RS	SS/SS/SS
	BF_19	RR	RR	RS		BF_19	RR	SS	RS			Blood fed	9	10	10	16	3	1	4	0	0	53					Dead Unfed	4	3	9	1	1	2	4	3	27				Dead Blood Fed	1	4	6	9	2	0	4	0	0
	BF_20	RR	RR	RS		BF_20	RR	RS	RS			Un fed	13	6	14	6	1	2	0	4	3	49						13	6	14	6	1	2	4	3					Alive Blood fed	8	6	4	7	1	1	0	0	0
	BF_21	RR	RS	SS		BF_21	RS	RS	RS				22	16	24	22	4	3	4	4	3						%Genotype frequency of the combined genotypes (6.5kb SV + CYP6P9a + CYP6P9b) and ability to survive													% Genotype of the combined genotypes (6.5kb SV + CYP6P9a + CYP6P9b) and ability to survive post bloofd feed
	BF_22	RR	RS	RS		BF_22	RR	SS	SS																			RR/RR/RR	RR/RR/RS	RS/RS/RS	RS/RS/RR	RR/RS/SS	RR/SS/RR	SS/RS/RS	SS/SS/SS					%ages	RR/RR/RR	RR/RR/RS	RS/RS/RS	RS/RS/RR	RR/RS/SS	RR/SS/RR	RR/SS/SS	SS/RS/RS	SS/SS/SS
	BF_23	RR	RS	RS		BF_23	RR	RS	RS			%Genotype frequency of combined genotypes (6.5kb SV + CYP6P9a + CYP6P9b) and ability to blood feed															Alive Unfed	69.2308	50	35.7143	83.3333	0	0	0	0					Dead Blood Fed	11.1111	40	60	56.25	66.6667	0	100	#DIV/0!	#DIV/0!
	BF_24	RR	RS	RS		BF_24	RR	RS	RS			% ages	RR/RR/RR	RR/RR/RS	RS/RS/RS	RS/RS/RR	RR/RS/SS	RR/SS/RR	RR/SS/SS	SS/RS/RS	SS/SS/SS						Dead Unfed	30.7692	50	64.2857	16.6667	100	100	100	100					Alive Blood fed	88.8889	60	40	43.75	33.3333	100	0	#DIV/0!	#DIV/0!
	BF_25	RR	RS	RS		BF_25	RR	RS	RS			Blood fed	40.9091	62.5	41.6667	72.7273	75	33.3333	100	0	0
	BF_26	RS	RR	RS		BF_26	RR	SS	RS			Un fed	59.0909	37.5	58.3333	27.2727	25	66.6667	0	100	100
	BF_27	RR	SS	RR		BF_27	RR	RS	RS
	BF_28	RR	RR	RS		UF_1	SS	RS	RR
	BF_29	RS	RR	RR		UF_2	SS	RS	RS
	BF_30	RR	RR	RR		UF_3	RR	RR	RR
	UF_1	RR	RS	RR		UF_4	SS	RR	RR
	UF_2	RR	RS	RS		UF_5	RS	RS
	UF_3	RS	RS	RS		UF_6	SS	RS	RS
	UF_4	RR	RR	RR		UF_7	RS	RS	RR
	UF_5	RR	RR	RR		UF_8	RS	RS	RS
	UF_6	RS	RS	RS		UF_9	SS	RS	RS
	UF_7	RS	RR	RR		UF_10	RS	RS	RS
	UF_8	RR	RS	RS		UF_11	RR	RR	RR
	UF_9	RR	RR	RR		UF_12	RS	RR	RR
	UF_10	RS		RR		UF_13	SS	RR	RR
	UF_11	RR	RR	RR		UF_14	RS	RR	RR
	UF_12	RS	RR	RR		UF_15	RR	RR	RR
	UF_13	RR	RR	RR		UF_16	SS	SS	SS			Correlation between the combined three genotypes (6.5kb SV + CYP6P9a + CYP6P9b) and ability to bloodfeed															Correlation between the combined three genotypes (6.5kb SV + CYP6P9a + CYP6P9b) and ability to survive													Correlation between the combined three genotypes (6.5kb SV + CYP6P9a + CYP6P9b) and ability to survive post bloodfeeding
	UF_14	RR	RS	RS		UF_17	RS	RR	RR				ODDS RATIO	CI	p value (Fisher's exact test)												STATS	ODDS RATIO	CI	p value (Fisher's exact test)										STAT	ODDS RATIO	CI	p value (Fisher's exact test)
	UF_15	RR	RS	RS		UF_18	RS	RS	RS			RR/RR/RR vs SS/SS/SS	0	0.0 to 0.05	<0.0001												RR/RR/RR vs SS/SS/SS	Inf.	65.7 to Inf.	<0.0001										RR/RR/RR vs RR/SS/SS	Infinity	195.6 to Infinity	<0.0001
	UF_16	RR		RS		UF_19	RS	SS	RS			RR/RR/RR vs SS/RS/RS	0	0.0 to 0.05	<0.0001												RR/RR/RR vs SS/RS/RS	Inf.	64.7 to Inf.	<0.0001										RR/RR/RR vs RR/RS/SS	16.43	7.59 to 34.98	<0.0001
	UF_17	RS	RS	RS		UF_20	SS	SS	SS			RR/RR/RR vs RR/SS/SS	Infinity	41.35 to Inf.	<0.0001												RR/RR/RR vs RR/SS/RR	Inf.	64.7 to Inf.	<0.0001										RR/RR/RR vs RS/RS/RR	10.3	4.86 to 22.16	<0.0001
	UF_18	RS		RS		UF_21	RS	RS	RS			RR/RR/RR vs RR/SS/RR	0.71	0.3997 to 1.239	0.3053												RR/RR/RR vs RR/RS/SS	Inf.	64.7 to Inf.	<0.0001										RR/RR/RR vs RS/RS/RS	12.14	5.71 to 26.26	<0.0001
	UF_19	RR	RR	RR		UF_22	RS	RS	RS			RR/RR/RR vs RR/RS/SS	4.317	2.395 to 7.856	<0.0001												RR/RR/RR vs RS/RS/RR	0.44	0.23 to 0.89	0.028										RR/RR/RR vs RR/SS/RR	0	0 to 0.28	0.0007
	UF_20	RS	RS	RS		UF_23	RR	RR	RR			RR/RR/RR vs RS/RS/RR	3.9	2.1 to 6.9	<0.0001												RR/RR/RR vs RS/RS/RS	4.21	2.3 to 7.5	<0.0001										RR/RR/RR vs RR/RR/RS	5.89	2.51 to 11.66	<0.0001
	UF_21	RR	RR	RR		UF_24	RS	RS	RS			RR/RR/RR vs RS/RS/RS	1	0.6 to 1.9	>0.9999												RR/RR/RR vs RR/RR/RS	2.3	1.3 to 4.2	0.0059										RR/RR/RS vs RR/SS/SS	Infinity	43.06 to Infinity	<0.0001
	UF_22	RS	RS	RS		UF_25	RS	RS	RS			RR/RR/RR vs RR/RR/RS	2.4	1.4 to 4.2	0.003												RR/RR/RS vs SS/SS/SS	Inf.	28.9 to Inf.	<0.0001										RR/RR/RS vs RR/RS/SS	3.045	1.69 to 5.47	0.0002
	UF_23	RR	RR	RR		UF_26	RS	RS	RS																		RR/RR/RS vs SS/RS/RS	Inf.	28.9 to Inf.	<0.0001										RR/RR/RS vs RS/RS/RR	1.909	1.08 to 3.29	0.0335
	UF_24	RR	RS	RS		UF_27	RS	RS	RS																		RR/RR/RS vs RR/SS/RR	Inf.	28.9 to Inf.	<0.0001										Rr/RR/RS vs RS/RS/RS	2.25	1.27 to 3.92	0.0071
	UF_25	RR	RR	RR		UF_28	SS	SS	SS																		RR/RR/RS vs RR/RS/SS	Inf.	28.9 to Inf.	<0.0001										RR/RR/RS vs RR/SS/RR	0	0 to 0.05	<0.0001
																											RR/RR/RS vs RS/RS/RR	0.19	0.1 to 0.4	<0.0001										RR/SS/RR vs RR/SS/SS	infinity	1980 to Infinity	<0.0001
																											RR/RR/RS vs RS/RS/RS	1.83	1.0 to 3.2	0.0449										RR/SS/RR vs RR/RS/SS	Infinity	57.58 to Infinity	<0.0001
																											RS/RS/RS vs SS/SS/SS	Inf.	15.7 to Inf.	<0.0001										RR/SS/RR vs RS/RS/RR	Infinity	36.68 to Infinity	<0.0001
																											RS/RS/RS vs SS/RS/RS	Inf.	15.7 to Inf.	<0.0001										RR/SS/RR vs RS/RS/RS	Infinity	43.06 to Infinity	<0.0001
																											RS/RS/RS vs RR/SS/RR	Inf.	15.7 to Inf,	<0.0001										RS/RS/RS vs RR/SS/SS	Infinity	19.22 to Infinity	<0.0001
																											RS/RS/RS vs RR/RS/SS	Inf.	15.7 to Inf.	<0.0001										RS/RS/RS vs RR/RS/SS	1.354	0.77 to 2.4	0.3782
																											RS/RS/RS vs RS/RS/RR	0.11	0.1 to 0.2	<0.0001										RS/RS/RS vs RS/RS/RR	0.85	0.49 to 1.51	0.6675
																																								RS/RS/RR vs RR/SS/SS	Infinity	22.7 to Infinity	<0.0001
																																								RS/RS/RR vs RR/RS/SS	1.595	0.88 to 2.82	0.146
																																								RR/RS/SS vs RR/SS/SS	Infinity	14.07 to Infinity	<0.0001
