# Supplementary material for: The duplicated cytochrome P450 CYP6P9a/b confers cross-resistance to a mitochondrial complex I inhibitor in the African malaria vector Anopheles funestus
Source: BMC Genomics. 2025 Sep 26;26:837. doi: 10.1186/s12864-025-11984-1 (PMC12465288; doi:10.1186/s12864-025-11984-1)
Supplement: Supplementary file 7 — Supplementary Material 7 [file 12864_2025_11984_MOESM7_ESM.xlsx]

## Sheet: FuMoz
		WHO Tunnel bioassays with FUMOZ pyrethroid-resistant laboratory strain
		Name of person performing bioassays: Ben, Willy and T-Boy
		Date of test (dd/mm/yyyy): |_2_|8_|/|1__|_0_|/|_2_|0_|_2_|_0_|
		LN code: |__|__|__|__|__|__|__|__|
		Temperature: |_2_|_6_| °C Relative humidity: |_7_|_5_| %
		Test mosquito species and strain: Kisumu	Ngousso
		Age of mosquitoes: |__6_| days
		* Females are introduced at 19:00 h and collected at 09:00 h.
				Blood fed females					Unfed females				Total			Total tested	%Mortality 24h	%Bloodfeeding			Mortality 24h %
				Alive		Death			Alive		Death		Alive	Death	Blood fed					Control	3.9604
				Immediate	24h	Immediate	24h	48h	Immediate	24h	Immediate	24h								PermaNet 2.0	6.93069
		Control	Compartment 1	26	26	0	0	0	13	13	1	1								PermaNet 3.0	90.1099
			Compartment 2	55	55	3	3	3	3	3	0	0								0.7% incorporated Sherlock net	64.7059
			Total	81	81	3	3	3	16	16	1	1	97	4	84	101	3.9604	83.1683
		PermaNet 2.0	Compartment 1	19	19	0	0	0	13	13	5	5
			Compartment 2	52	52	0	0	0	10	10	2	2
			Total	71	71	0	0	0	23	23	7	7	94	7	71	101	6.93069	70.297			Blood feeding %	Blood feeding inhibition%
		PermaNet 3.0	Compartment 1	3	3	9	9	9	0	0	41	41								Control	83.16	16.8
			Compartment 2	5	5	8	8	8	1	1	24	24								PermaNet 2.0	70.29	15.47
			Total	8	8	17	17	17	1	1	65	65	9	82	25	91	90.1099	27.4725		PermaNet 3.0	27.47	66.96
		0.7% incorporated Sherlock net	Compartment 1	2	2	10	10	10	12	12	23	23								0.7% incorporated Sherlock net	37.25	55.2
			Compartment 2	15	15	11	11	11	10	9	19	20
			Total	17	17	21	21	21	20	19	44	45	35	67	38	102	64.7059	37.2549
		Fumoz	Penetration rate (%)
		Control	86.13
		PermaNet 2.0	82.17
		PermaNet 3.0	54.94
		0.7% incorporated Sherlock net	65.68

## Sheet: FuMoz_FAng hybrid
	WHO tunnel bioassay with FUMOZ/FANG F4 hybrids
	Name of person performing bioassays: Theofelix
	Date of test (dd/mm/yyyy): |__|_|/|0__|_9_|/|_2_|0_|_2_|_1_|
	LN code: |__|__|__|__|__|__|__|__|
	Temperature: |_2_|_5_| °C Relative humidity: |_7_|_7_| %
	Test mosquito species and strain: Kisumu	FUMOZ/FANG F4 hybrids
	Age of mosquitoes: |__2 - 6_| days
	* Females are introduced at 19:00 h and collected at 09:00 h.
	Dates	Bed net	% Mortality 24h	% Blood feeding	% Blood feeding inhibition
	21.09.21	Control net	0	81	19
	23.09.21	Control net	0	90.0901	9.90991			net	% Mortality 24h (corrected)	% Blood feeding	% Blood Feeding inhibition
	24.09.21	Control net	0	73.0496	26.9504			Control net	0	82.2483	17.7517
	29.09.21	Control net	0	83.6066	16.3934			PermaNet 2.0	29.6091	67.1419	32.8581
	13.10.21	Control net	0	83.4951	16.5049			0.7% incorporated Sherlock net	72.4913	19.0948	80.9052
	21.09.21	PermaNet 2.0	54.3747	33.6957	66.3043			PermaNet 3.0 (top)	100	0	100
	23.09.21	PermaNet 2.0	31.3402	78.2609	21.7391
	24.09.21	PermaNet 2.0	27.2124	71.4912	28.5088
	29.09.21	PermaNet 2.0	11.1182	71.4286	28.5714			SEM
	13.10.21	PermaNet 2.0	24	80.8333	19.1667			net	% Mortality 24h	% Blood feeding	Bld.Fd* INB
	21.09.21	0.7% incorporated Sherlock net	74.9072	18.6992	81.3008			Control net	0	2.74833	2.74833
	23.09.21	0.7% incorporated Sherlock net	76.1598	21.875	78.125			PermaNet 2.0	7.05497	8.56455	8.56455
	24.09.21	0.7% incorporated Sherlock net	74.5476	11.9403	88.0597			0.7% incorporated Sherlock net	1.74208	2.29848	2.29848
	29.09.21	0.7% incorporated Sherlock net	69.8418	25.6757	74.3243			PermaNet 3.0 (top)	1.42109e-14	0	1.00486e-14
	13.10.21	0.7% incorporated Sherlock net	67	17.284	82.716
	21.09.21	PermaNet 3.0 (top)	100	0	100
	23.09.21	PermaNet 3.0 (top)	100	0	100

## Sheet: Mibellon
				%Mortality 24h	Average	Error	%Mortality 48h	Average	Error	%Bloodfeeding	Average	Error	%Bloodfeeding inhibition	Average	Error
		Control	Replicat 1	9.35			9.35			50.47
			Replicat 2	9.52			9.52			53.33
			replicat 3	9.9			9.9			55.45								% Mortality 24h	Error 24h
			Replicat 4														Control	9.59	0.162583
																	PermaNet 2.0	45.75	6.00507
			Average/error		9.59	0.162583		9.59	0.162583		53.0833	1.44288					Permanet 3.0	83.7633	3.66379
		PermaNet 2.0	Replicat 1	34.95			34.95			12.62			74.99				0.7% incorporated Sherlock net	52.8067	9.29816
			Replicat 2	55.7			58.23			1.27			97.61
			replicat 3	46.6			52.43			16.5			70.24
			Replicat 4
			Replicat 5															%BF	%BFI	Error BF	Error BFI
			Average/error		45.75	6.00507		48.5367	6.99662		10.13	4.5694		80.9467	8.44375		Control	53.0833		1.44288
		PermaNet 3.0	Replicat 1	91.09			87.13			0			100				PermaNet 2.0	10.13	80.9467	4.5694	8.44375
			Replicat 2	80.2			86.14			0			100				Permanet 3.0	0	100	0	0
			replicat 3	80			86			0			100				0.7% incorporated Sherlock net	0	100	0	0
			Replicat 4
			Replicat 5
			Average/error		83.7633	3.66379		86.4233	0.355637		0	0		100	0
		AM-16-8	Replicat 1	34.31			35.29			0			100
			Replicat 2	63.72			66.66			0			100
			replicat 3	60.39			60.39			0			100
			Replicat 4
			Replicat 5
			Average/error		52.8067	9.29816		54.1133	9.58413		0	0		100	0

## Sheet: Kisumu
		WHO tunnel bioassay with Kisumu susceptible strain
				%Mortality 24h	Average	Error	%Bloodfeeding	Average	Error	%Bloodfeeding inhibition	Average	Error
		Control	Replicat 1	8.26			51.38
			Replicat 2	9.09			50.91
			replicat 3	9.8			81.37								% Mortality 24h	Error 24h
			Replicat 4	8.82			92.12							Control	8.9925	0.31988
														PermaNet 2.0	75.27	1.32237
			Average/error		8.9925	0.31988		68.945	10.5089					Permanet 3.0	98.295	0.83783
		PermaNet 2.0	Replicat 1	76.24			4.95			90.36				0.7% incorporated Sherlock net	87.8975	4.90238
			Replicat 2	73			5			90.17
			replicat 3	78.57			14.29			82.43
			Replicat 4	73.27			24.75			73.14
			Replicat 5												%BF	%BFI	Error BF	Error BFI
			Average/error		75.27	1.32237		12.2475	4.71049		84.025	4.07145		Control	68.945		10.5089
		PermaNet 3.0	Replicat 1	98.06			0			100				PermaNet 2.0	12.2475	84.025	4.71049	4.07145
			Replicat 2	96.08			0			100				Permanet 3.0	5.2525	94.1975	3.59624	3.90922
			replicat 3	99.04			5.77			93.33				0.7% incorporated Sherlock net	2.49	97.075	1.44041	1.68875
			Replicat 4	100			15.24			83.46
			Replicat 5
			Average/error		98.295	0.83783		5.2525	3.59624		94.1975	3.90922
		AM-16-8	Replicat 1	87.25			0			100
			Replicat 2	74.5			0			100
			replicat 3	97.14			4.76			94.15
			Replicat 4	92.7			5.2			94.15
			Replicat 5
			Average/error		87.8975	4.90238		2.49	1.44041		97.075	1.68875
