# Supplementary material for: The duplicated cytochrome P450 CYP6P9a/b confers cross-resistance to a mitochondrial complex I inhibitor in the African malaria vector Anopheles funestus
Source: BMC Genomics. 2025 Sep 26;26:837. doi: 10.1186/s12864-025-11984-1 (PMC12465288; doi:10.1186/s12864-025-11984-1)
Supplement: Supplementary file 8 — Supplementary Material 8 [file 12864_2025_11984_MOESM8_ESM.docx]

**Supplementary data**

**Supplementary 1:** CDC Bottle bioassays

**Supplementary 1a:** Sample generation for bottle bioassay

|  |  | **No of Alive** | | **No of Dead** | | **Target**  **(Alive: Dead)** | **% Mortality (Corrected)** | |
| --- | --- | --- | --- | --- | --- | --- | --- | --- |
|  | **Time of exposure** | **30 mins.** | **60 mins.** | **30 mins.** | **60 mins.** |  | **30 mins.** | **60 mins** |
| **FUMOZ-R/FANG F4 hybrids** | **Negative control** | 86 | 216 | 4 | 15 | 100 alive | 0 % | 0% |
| **Permethrin control** | 51 | 49 | 146 | 653 | 100: 60 | 73±6.2% | 92±1.1% |
| **Sherlock 1xDC** | 61 | 42 | 132 | 576 | 100: 60 | 67±4.6% | 93±0.8% |
| **Sherlock 5xDC** | 42 | 20 | 175 | 646 | 100: 60 | 80±5.1% | 97±0.97% |
| **Mibellon F1** | **Negative control** | 75 | 90 | 2 | 5 | 100 alive | 2.6±1.6% | 0% |
| **Permethrin control** | 94 | 66 | 39 | 87 | 100:60 | 29.3±9.6% | 54.5±7.2% |
| **Sherlock 1xDC** | 32 | 3 | 247 | 149 | 100:60 | 88.5±4.1% | 97.9±0.9% |
| **Sherlock 5xDC** | 27 | 3 | 324 | 178 | 100:60 | 92.3±1.5% | 98.3±1.1% |

**Supplementary 1b:** Genotypic frequencies and allele frequencies of the 6.5 kb *SV* among FUMOZ-R/FANG F4 hybrids exposed to Permethrin bottles (A and B, respectively), Sherlock 1xDC (C and D, respectively), and Sherlock 5xDC (E and F, respectively)

**B**

**A**

**C**

**D**

**F**

**E**

**Supplementary 1c:** Genotypic and allelic frequencies of *CYP6P9a* among FUMOZ-R/FANG F4 hybrids exposed to Permethrin (A and B, respectively), Sherlock 1xDC (C and D, respectively), and Sherlock 5xDC (E and F, respectively)

**A**

**B**


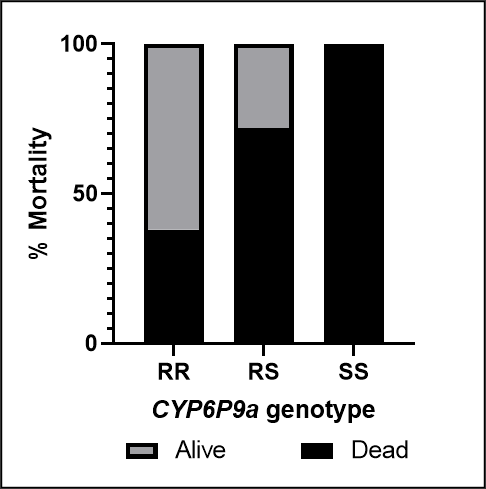


**C**

**D**

**E**

**F**

**Supplementary 1d:** Genotypic and allelic frequencies of *CYP6P9b* among FUMOZ-R/FANG F4 hybrids exposed to Permethrin (A and B, respectively), Sherlock 1xDC (C and D, respectively), and Sherlock 5xDC (E and F, respectively)

**B**

**A**

**C**

**D**

**F**

**E**

**Supplementary 1e:** The association between the combined three markers and the ability of FUMOZ-R/FANG F4 hybrids to survive exposure to insecticide bottles. The correlation between the combined three markers and the ability of F4 hybrids to survive permethrin, 1xDC Sherlock and 5xDC Sherlock bottles

|  | **SV/CYP6P9a/CYP6P9b** | **OR** | **CI** | **p value** |
| --- | --- | --- | --- | --- |
| **Permethrin bottles** | **SV+/SV+/RR/RR vs SV-/SV-/SS/SS** | 38.36 | 17.05 to 79.72 | <0.0001 |
| **SV+/SV+/RR/RR vs SV-/SV-/RS/SS** | Infinity | 145.8 to Infinity | <0.0001 |
| **SV+/SV+/RR/RR vs SV+/SV-/RS/RS** | 37.92 | 16.84 to 78.85 | <0.0001 |
| **SV+/SV+/RR/RR vs SV+/SV+/RS/RS** | 11.51 | 5.84 to 22.91 | <0.0001 |
| **SV+/SV+/RR/RR vs SV+/SV+/RR/RS** | 0 | 0 to 0.23 | <0.0001 |
| **SV+/SV+/RR/RS vs SV-/SV-/SS/SS** | Infinity | 169.6 to Infinity | <0.0001 |
| **SV+/SV+/RR/RS vs SV-/SV-/RS/SS** | Infinity | 1980 to Infinity | <0.0001 |
| **SV+/SV+/RR/RS vs SV+/SV-/RS/RS** | Infinity | 167.6 to Infinity | <0.0001 |
| **SV+/SV+/RR/RS vs SV+/SV+/RS/RS** | Infinity | 57.58 to infinity | <0.0001 |
| **SV+/SV+/RS/RS vs SV-/SV-/SS/SS** | 3.334 | 1.596 to 6.56 | 0.0008 |
| **SV+/SV+/RS/RS vs SV-/SV-/RS/SS** | Infinity | 14.07 to Infinity | <0.0001 |
| **SV+/SV+/RS/RS vs SV+/SV-/RS/RS** | 3.296 | 1.58 to 6.48 | 0.0013 |
| **SV+/SV-/RS/RS vs SV-/SV-/SS/SS** | 1.011 | 0.44 to 2.32 | >0.9999 |
| **SV+/SV-/RS/RS vs SV-/SV-/RS/SS** | Infinity | 3.73 to Infinity | 0.0002 |
| **SV-/SV-/RS/SS vs SV-/SV-/SS/SS** | 0 | 0 to 0.27 | 0.0002 |
| **1x DC sherlock bottles** | **SV+/SV+/RR/RR vs SV-/SV-/SS/SS** | Infinity | 120.8 to Infinity | <0.0001 |
| **SV+/SV+/RR/RR vs SV+/SV-/RS/RS** | 20.75 | 9.93 to 41.25 | <0.0001 |
| **SV+/SV+/RR/RR vs SV+/SV+/RS/RS** | 6.039 | 3.13 to 11.6 | <0.0001 |
| **SV+/SV+/RR/RR vs SV+/SV+/RR/RS** | 3.037 | 1.6 to 5.83 | 0.001 |
| **SV+/SV+/RR/RS vs SV-/SV-/SS/SS** | Infinity | 43.06 to Infinity | <0.0001 |
| **SV+/SV+/RR/RS vs SV+/SV-/RS/RS** | 6.83 | 3.53 to 13.2 | <0.0001 |
| **SV+/SV+/RR/RS vs SV+/SV+/RS/RS** | 1.99 | 1.13 to 3.44 | 0.0233 |
| **SV+/SV+/RS/RS vs SV-/SV-/SS/SS** | Infinity | 21.79 to Infinity | <0.0001 |
| **SV+/SV+/RS/RS vs SV+/SV-/RS/RS** | 3.44 | 1.77 to 6.58 | 0.0002 |
| **SV+/SV-/RS/RS vs SV-/SV-/SS/SS** | Infinity | 5.87 to Infinity | <0.0001 |
| **5x DC sherlock bottles** | **SV+/SV+/RR/RR vs SV-/SV-/SS/SS** | Infinity | 1980 to Infinity | <0.0001 |
| **SV+/SV+/RR/RR vs SV-/SV-/RS/SS** | Infinity | 1980 to Infinity | <0.0001 |
| **SV+/SV+/RR/RR vs SV+/SV-/RS/RS** | Infinity | 119.2 to Infinity | <0.0001 |
| **SV+/SV+/RR/RR vs SV+/SV+/RS/RS** | Infinity | 1980 to Infinity | <0.0001 |
| **SV+/SV+/RR/RR vs SV+/SV+/RR/RS** |  |  | >0.9999 |
| **SV+/SV+/RR/RS vs SV-/SV-/SS/SS** | Infinity | 1980 to Infinity | <0.0001 |
| **SV+/SV+/RR/RS vs SV-/SV-/RS/SS** | Infinity | 1980 to Infinity | <0.0001 |
| **SV+/SV+/RR/RS vs SV+/SV-/RS/RS** | Infinity | 119.2 to Infinity | <0.0001 |
| **SV+/SV+/RR/RS vs SV+/SV+/RS/RS** | Infinity | 1980 to Infinity | <0.0001 |
| **SV+/SV+/RS/RS vs SV-/SV-/SS/SS** |  |  | >0.9999 |
| **SV+/SV+/RS/RS vs SV-/SV-/RS/SS** |  |  | >0.9999 |
| **SV+/SV+/RS/RS vs SV+/SV-/RS/RS** | 0 | 0 to 0.17 | <0.0001 |
| **SV+/SV-/RS/RS vs SV-/SV-/SS/SS** | Infinity | 5.94 to Infinity | <0.0001 |
| **SV+/SV-/RS/RS vs SV-/SV-/RS/SS** | Infinity | 5.94 to Infinity | <0.0001 |
| **SV-/SV-/RS/SS vs SV-/SV-/SS/SS** |  |  | >0.9999 |

**Supplementary 2: WHO cone bioassays**

**Supplementary 2a:** Genotypic and allelic of the L119F_GSTe2 frequencies among *An. funestus* F1 Mibellon strains exposed to PermaNet 2.0 (A and B, respectively) and 0.7% incorporated Sherlock net (C and D, respectively)

**B**

**A**

**C**

**D**

**Supplementary 2b:** Table of significance showing the genotype and allele frequencies of the L119F-*GSTe2* pyrethroid-resistance marker in field *An. funestus* strains

|  |  | **OR** | **CI** | **p value** | **Summary** |
| --- | --- | --- | --- | --- | --- |
| **PermaNet 2.0** | **RR vs SS** | Infinity | 1.957 to Infinity | 0.0059 | ** |
| **RR vs RS** | Infinity | 1.490 to Infinity | 0.0159 | * |
| **RS vs SS** | 1.225 | 0.6713 to 2.249 | 0.5454 | ns |
| **R vs S** | 1.658 | 0.8289 to 3.304 | 0.2156 | ns |
| **0.7% incorporated Sherlock net** | **RR vs SS** | Infinity | 0.9918 to Infinity | 0.0901 | ns |
| **RR vs RS** | Infinity | 2.537 to Infinity | 0.0022 | ** |
| **RS vs SS** | 0.4085 | 0.2319 to 0.7280 | 0.0033 | ** |
| **R vs S** | 0.7619 | 0.4164 to 1.372 | 0.452 | ns |

**Supplementary 2c:** The combined effect of the three markers on the ability of FUMOZ-R/FANG F4 hybrids to survive exposure to bed nets. The correlation between the combined three markers and the ability of FUMOZ-R/FANG F4 hybrids to survive exposure to PermaNet 2.0 and Sherlock bed net

|  | **SV/CYP6P9a/CYP6P9b** | **OR** | **CI** | **p value** |
| --- | --- | --- | --- | --- |
| **PermaNet 2.0** | **SV+/SV+/RR/RR vs SV-/SV-/SS/SS** | Infinity | 1980 to Infinity | <0.0001 |
| **SV+/SV+/RR/RR vs SV+/SV-/SS/SS** | Infinity | 28.91 to Infinity | <0.0001 |
| **SV+/SV+/RR/RR vs SV+/SV-/RS/RS** |  |  | >0.9999 |
| **SV+/SV+/RR/RR vs SV+/SV+/RS/RS** |  |  | >0.9999 |
| **SV+/SV+/RR/RR vs SV+/SV+/RS/RR** | Infinity | 9.31 to Infinity | <0.0001 |
| **SV+/SV+/RS/RR vs SV-/SV-/SS/SS** | Infinity | 82.96 to Infinity | <0.0001 |
| **SV+/SV+/RS/RR vs SV+/SV-/SS/SS** | 3 | 1.67 to 5.39 | 0.0004 |
| **SV+/SV+/RS/RR vs SV+/SV-/RS/RS** | 0 | 0 to 0.11 | <0.0001 |
| **SV+/SV+/RS/RR vs SV+/SV+/RS/RS** | 0 | 0 to 0.11 | <0.0001 |
| **SV+/SV+/RS/RS vs SV-/SV-/SS/SS** | Infinity | 1980 to Infinity | <0.0001 |
| **SV+/SV+/RS/RS vs SV+/SV-/SS/SS** | Infinity | 28.91 to Infinity | <0.0001 |
| **SV+/SV+/RS/RS vs SV+/SV-/RS/RS** |  |  | >0.9999 |
| **SV+/SV-/RS/RS vs SV-/SV-/SS/SS** | Infinity | 1980 to Infinity | <0.0001 |
| **SV+/SV-/RS/RS vs SV+/SV-/SS/SS** | Infinity | 28.91 to Infinity | <0.0001 |
| **SV-+/SV-/SS/SS vs SV-/SV-/SS/SS** | Infinity | 28.91 to Infinity | <0.0001 |
| **0.7% incorporated Sherlock Net** | **SV+/SV+/RR/RR vs SV-/SV-/SS/SS** | Infinity | 156.1 to Infinity | <0.0001 |
| **SV+/SV+/RR/RR vs SV-/SV-/RS/SS** | Infinity | 57.58 to Infinity | <0.0001 |
| **SV+/SV+/RR/RR vs SV+/SV-/RS/RS** | Infinity | 68.71 to Infinity | <0.0001 |
| **SV+/SV+/RR/RR vs SV+/SV+/RR/RS** | Infinity | 5.42 to Infinity | <0.0001 |
| **SV+/SV+/RR/RS vs SV-/SV-/SS/SS** | 29.99 | 14.02 to 65.09 | <0.0001 |
| **SV+/SV+/RR/RS vs SV-/SV-/RS/SS** | 9.91 | 4.96 to 18.59 | <0.0001 |
| **SV+/SV+/RR/RS vs SV+/SV-/RS/RS** | 11.95 | 6.17 to 22.86 | <0.0001 |
| **SV+/SV+/RR/RS vs SV+/SV+/RS/RS** | 0.2034 | 0.07 to 0.58 | 0.0046 |
| **SV+/SV+/RS/RS vs SV-/SV-/SS/SS** | 147.4 | 46.52 to 402.5 | <0.0001 |
| **SV+/SV+/RS/RS vs SV-/SV-/RS/SS** | 48.73 | 16.46 to 130.1 | <0.0001 |
| **SV+/SV+/RS/RS vs SV+/SV-/RS/RS** | 58.76 | 19.56 to 157.1 | <0.0001 |
| **SV+/SV-/RS/RS vs SV-/SV-/SS/SS** | 2.509 | 1.27 to 5.24 | 0.0153 |
| **SV+/SV-/RS/RS vs SV-/SV-/RS/SS** | 0.8293 | 0.45 to 1.53 | 0.6467 |
| **SV-/SV-/RS/SS vs SV-/SV-/SS/SS** | 3.026 | 1.48 to 6.22 | 0.0025 |

**Supplementary 3:** WHO tunnel tests

**Supplementary 3a:** Genotypic and allelic of the 6.5 kb *SV* frequencies among FUMOZ-R/FANG F4 hybrids exposed to PermaNet 2.0: (Mortality (A and B, respectively) and blood-feeding status (C and D, respectively)

**B**

**A**

**C**

**DD**

**Supplementary 3b:** Genotypic and allelic of the 6.5 kb *SV* frequencies among FUMOZ-R/FANG F4 hybrids exposed to sherlock net: Mortality (C and D, respectively) and blood-feeding status (C and D, respectively)

**A**

**B**

**D**

**C**

**Supplementary 3c:** Genotypic and allelic of the *CYP6P9a* frequencies among FUMOZ-R/FANG F4 hybrids exposed to PermaNet 2.0: Mortality (C and D, respectively) and blood-feeding status (C and D, respectively)

**B**

**A**

**C**

**D**

**Supplementary 3d:** Genotypic and allelic of the *CYP6P9a* frequencies among F4 hybrids exposed to 0.7% incorporated Sherlock net: Mortality (C and D, respectively) and blood-feeding status (C and D, respectively)

**B**

**A**

**C**

**D**

**Supplementary 3e:** Genotypic and allelic of the *CYP6P9b* frequencies among FUMOZ-R/FANG F4 hybrids exposed to PermaNet 2.0: Mortality (C and D, respectively) and blood-feeding status (C and D, respectively)

**B**

**A**

**C**

**D**

**Supplementary 3f:** Genotypic and allelic of the *CYP6P9b* frequencies among FUMOZ-R/FANG F4 hybrids exposed to 0.7% incorporated Sherlock net: Mortality (C and D, respectively) and blood-feeding status (C and D, respectively)

**B**

**A**

**C**

**D**

**Supplementary 3g:** The ability of FUMOZ-R/FANG F4 hybrids with or without resistant markers to survive after successfully penetrating through bed net and blood-feeding on bait. Genotypic frequencies of *CYP6P9a* and *CYP6P9b* among FUMOZ-R/FANG F4 hybrids exposed to PermaNet 2.0 and 0.7% incorporated Sherlock bed net

**Supplementary 3h:** Correlation between genotypes of the 6.5 kb SV, *CYP6P9a* and *CYP6P9b* and the ability of FUMOZ-R/FANG F4 hybrids to survive exposure to 0.7% incorporated Sherlock net and PermaNet 2.0 post blood feeding (For the Sherlock-exposed comparison, no SS individuals for the structural variant were detected in either the alive or dead blood-fed groups, explaining the empty cells; all hybrids with the SS genotype were exclusively in the unfed group)

|  |  | **OR** | **CI** | **P value** | **OR** | **CI** | **P value** | **OR** | **CI** | **P value** |
| --- | --- | --- | --- | --- | --- | --- | --- | --- | --- | --- |
|  |  | ***6.5 kb* SV** | | | ***CYP6P9a*** | | | ***CYP6P9b*** | | |
| **Permanent 2.0** | **RR vs SS** | 13.67 | 6.76-27.17 | <0.0001 | 46 | 18.52-105.0 | <0.0001 | 3.48 | 1.91-6.22 | <0.0001 |
| **RS vs SS** | 5.03 | 2.55-10.12 | <0.0001 | 4.33 | 2.31-7.92 | <0.0001 | 3.96 | 2.16-6.94 | <0.0001 |
| **RR vs RS** | 2.72 | 1.5-4.9 | 0.001 | 10.6 | 4.72-22.53 | <0.0001 | 0.88 | 0.50-1.53 | 0.7703 |
| **0.7% incorporated Sherlock** | **RR vs SS** | - | - | - | 19.5 | 9.25-38.48 | <0.0001 | 29.33 | 13.59-61.66 | <0.0001 |
| **RS vs SS** | - | - | - | 5.03 | 2.55-10.12 | 0.0177 | 2.25 | 1.21-4.17 | 0.0177 |
| **RR vs RS** | 1 | 0.57-1.76 | >0.9999 | 3.9 | 2.14-7.08 | <0.0001 | 13.04 | 6.25-26.61 | <0.0001 |

**Supplementary 3i:** The combined additive advantage of the three markers on the ability of FUMOZ-R/FANG F4 hybrids to survive exposure to bed nets

|  | 6.5kb SV/CYP6P9a/CYP6P9b | **OR** | **CI** | **p value** |
| --- | --- | --- | --- | --- |
| **PermaNet 2.0** | **SV+/SV+/RR/RR vs SV-/SV-/RS/RS** | Infinity | 1980 to Infinity | <0.0001 |
|  | **SV+/SV+/RR/RR vs SV+/SV-/SS/RS** | Infinity | 33.88 to Infinity | <0.0001 |
|  | **SV+/SV+/RR/RR vs SV+/SV-/RS/RS** | Infinity | 14.07 to Infinity | <0.0001 |
|  | **SV+/SV+/RR/RR vs SV+/SV+/RR/RS** | Infinity | 4.14 to Infinity | <0.0001 |
|  | **SV+/SV+/RR/RS vs SV-/SV-/RS/RS** | Infinity | 156.1 to Infinity | <0.0001 |
|  | **SV+/SV+/RR/RS vs SV+/SV-/SS/RS** | **3.026** | 1.48 to 6.22 | 0.0025 |
|  | **SV+/SV+/RR/RS vs SV+/SV-/RS/RS** | 7.2 | 3.68 to 14.53 | <0.0001 |
|  | **SV+/SV-/RS/RS vs SV-/SV-/RS/RS** | Infinity | 57.58 to Infinity | <0.0001 |
|  | **SV+/SV-/RS/RS vs SV+/SV-/SS/RS** | 2.38 | 1.33 to 4.23 | 0.0042 |
|  | **SV+/SV-/SS/RS vs SV-/SV-/RS/RS** | Infinity | 24.63 to Infinity | <0.0001 |
| **0.7% incorporated Sherlock bed net** | **SV+/SV+/RR/RR vs SV-/SV-/SS/SS** | Inf. | 65.7 to Inf. | <0.0001 |
|  | **SV+/SV+/RR/RR vs SV-/SV-/RS/RS** | Inf. | 64.7 to Inf. | <0.0001 |
|  | **SV+/SV+/RR/RR vs SV+/SV+/SS/RR** | Inf. | 64.7 to Inf. | <0.0001 |
|  | **SV+/SV+/RR/RR vs SV+/SV+/RS/SS** | Inf. | 64.7 to Inf. | <0.0001 |
|  | **SV+/SV+/RR/RR vs SV+/SV-/RS/RR** | 0.44 | 0.23 to 0.89 | 0.028 |
|  | **SV+/SV+/RR/RR vs SV+/SV-/RS/RS** | 4.21 | 2.3 to 7.5 | <0.0001 |
|  | **SV+/SV+/RR/RR vs SV+/SV+/RR/RS** | 2.3 | 1.3 to 4.2 | 0.0059 |
|  | **SV+/SV+/RR/RS vs SV-/SV-/SS/SS** | Inf. | 28.9 to Inf. | <0.0001 |
|  | **SV+/SV+/RR/RS vs SV-/SV-/RS/RS** | Inf. | 28.9 to Inf. | <0.0001 |
|  | **SV+/SV+/RR/RS vs SV+/SV+/SS/RR** | Inf. | 28.9 to Inf. | <0.0001 |
|  | **SV+/SV+/RR/RS vs SV+/SV+/RS/SS** | Inf. | 28.9 to Inf. | <0.0001 |
|  | **SV+/SV+/RR/RS vs SV+/SV-/RS/RR** | 0.19 | 0.1 to 0.4 | <0.0001 |
|  | **SV+/SV+/RR/RS vs SV+/SV-/RS/RS** | 1.83 | 1.0 to 3.2 | 0.0449 |
|  | **SV+/SV-/RS/RS vs SV-/SV-/SS/SS** | Inf. | 15.7 to Inf. | <0.0001 |
|  | **SV+/SV-/RS/RS vs SV-/SV-/RS/RS** | Inf. | 15.7 to Inf. | <0.0001 |
|  | **SV+/SV-/RS/RS vs SV+/SV+/SS/RR** | Inf. | 15.7 to Inf, | <0.0001 |
|  | **SV+/SV-/RS/RS vs SV+/SV+/RS/SS** | Inf. | 15.7 to Inf. | <0.0001 |
|  | **SV+/SV-/RS/RS vs SV+/SV-/RS/RR** | 0.11 | 0.1 to 0.2 | <0.0001 |

**Supplementary 3j:** The combined effect of the three markers on the ability of FUMOZ-R/FANG F4 hybrids to survive after successfully penetrating through bed net and blood feeding. Genotypic frequencies of the combined three markers among FUMOZ-R/FANG F4 hybrids exposed to PermaNet 2.0 and Sherlock bed net

|  | 6.5kb SV/CYP6P9a/CYP6P9b | **OR** | **CI** | **p value** |
| --- | --- | --- | --- | --- |
| **PermaNet 2.0** | **SV+/SV+/RR/RR vs SV-/SV-/RS/RS** | Infinity | 1980 to Infinity | <0.0001 |
| **SV+/SV+/RR/RR vs SV+/SV-/SS/RS** | Infinity | 1980 to Infinity | <0.0001 |
| **SV+/SV+/RR/RR vs SV+/SV+/RS/SS** | Infinity | 1980 to Infinity | <0.0001 |
| **SV+/SV+/RR/RR vs SV+/SV-/RS/RS** | Infinity | 14.07 to Infinity | <0.0001 |
| **SV+/SV+/RR/RR vs SV+/SV+/RR/RS** | Infinity | 12.16 to Infinity | <0.0001 |
| **SV+/SV+/RR/RS vs SV-/SV-/RS/RS** | Infinity | 65.68 to Infinity | <0.0001 |
| **SV+/SV+/RR/RS vs SV+/SV-/SS/RS** | Infinity | 65.68 to Infinity | <0.0001 |
| **SV+/SV+/RR/RS vs SV+/SV+/RS/SS** | Infinity | 65.68 to Infinity | <0.0001 |
| **SV+/SV+/RR/RS vs SV+/SV-/RS/RS** | 1.15 | 0.64 to 2.12 | 0.7609 |
| **SV+/SV-/RS/RS vs SV-/SV-/RS/RS** | Infinity | 57.58 to Infinity | <0.0001 |
| **SV+/SV-/RS/RS vs SV+/SV-/SS/RS** | Infinity | 57.58 to Infinity | <0.0001 |
| **SV+/SV-/RS/RS vs SV+/SV+/RS/SS** | Infinity | 57.58 to Infinity | <0.0001 |
| **SV+/SV+/RS/SS vs SV-/SV-/RS/RS** |  |  | >0.9999 |
| **SV+/SV+/RS/SS vs SV+/SV-/SS/RS** |  |  | >0.9999 |
| **SV+/SV-/SS/RS vs SV-/SV-/RS/RS** |  |  | >0.9999 |
| **0.7% incorporated Sherlock bed net** | **SV+/SV+/RR/RR vs SV+/SV+/SS/SS** | Infinity | 195.6 to Infinity | <0.0001 |
| **SV+/SV+/RR/RR vs SV+/SV+/RS/SS** | 16.43 | 7.59 to 34.98 | <0.0001 |
| **SV+/SV+/RR/RR vs SV+/SV-/RS/RR** | 10.3 | 4.86 to 22.16 | <0.0001 |
| **SV+/SV+/RR/RR vs SV+/SV-/RS/RS** | 12.14 | 5.71 to 26.26 | <0.0001 |
| **SV+/SV+/RR/RR vs SV+/SV+/SS/RR** | 0 | 0 to 0.28 | 0.0007 |
| **SV+/SV+/RR/RR vs SV+/SV+/RR/RS** | 5.89 | 2.51 to 11.66 | <0.0001 |
| **SV+/SV+/RR/RS vs SV+/SV+/SS/SS** | Infinity | 43.06 to Infinity | <0.0001 |
| **SV+/SV+/RR/RS vs SV+/SV+/RS/SS** | 3.045 | 1.69 to 5.47 | 0.0002 |
| **SV+/SV+/RR/RS vs SV+/SV-/RS/RR** | 1.909 | 1.08 to 3.29 | 0.0335 |
| **SV+/SV+/RR/RS vs SV+/SV-/RS/RS** | 2.25 | 1.27 to 3.92 | 0.0071 |
| **SV+/SV+/RR/RS vs SV+/SV+/SS/RR** | 0 | 0 to 0.05 | <0.0001 |
| **SV+/SV+/SS/RR vs SV+/SV+/SS/SS** | infinity | 1980 to Infinity | <0.0001 |
| **SV+/SV+/SS/RR vs SV+/SV+/RS/SS** | Infinity | 57.58 to Infinity | <0.0001 |
| **SV+/SV+/SS/RR vs SV+/SV-/RS/RR** | Infinity | 36.68 to Infinity | <0.0001 |
| **SV+/SV+/SS/RR vs SV+/SV-/RS/RS** | Infinity | 43.06 to Infinity | <0.0001 |
| **SV+/SV-/RS/RS vs SV+/SV+/SS/SS** | Infinity | 19.22 to Infinity | <0.0001 |
| **SV+/SV-/RS/RS vs SV+/SV+/RS/SS** | 1.354 | 0.77 to 2.4 | 0.3782 |
| **SV+/SV-/RS/RS vs SV+/SV-/RS/RR** | 0.85 | 0.49 to 1.51 | 0.6675 |
| **SV+/SV-/RS/RR vs SV+/SV+/SS/SS** | Infinity | 22.7 to Infinity | <0.0001 |
| **SV+/SV-/RS/RR vs SV+/SV+/RS/SS** | 1.595 | 0.88 to 2.82 | 0.146 |
| **SV+/SV+/RS/SS vs SV+/SV+/SS/SS** | Infinity | 14.07 to Infinity | <0.0001 |
